# 1 Evolutionary branching in distorted trait spaces

2 Hiroshi C. Ito<sup>1\*</sup> and Akira Sasaki<sup>1,2</sup>

3

4 <sup>1</sup>Department of Evolutionary Studies of Biosystems, The Graduate University for  
5 Advanced Studies, SOKENDAI, Hayama, Kanagawa 240-0193, Japan

6 <sup>2</sup>Evolution and Ecology Program, International Institute for Applied Systems Analysis,  
7 Laxenburg, Austria

8

9 \* Corresponding author (Email: [hiroshibeetle@gmail.com](mailto:hiroshibeetle@gmail.com))

10

11

## 1 Abstract

2 Biological communities are thought to have been evolving in trait spaces that are not  
3 only multi-dimensional, but also distorted in a sense that mutational covariance  
4 matrices among traits depend on the parental phenotypes of mutants. Such a distortion  
5 may affect diversifying evolution as well as directional evolution. In adaptive dynamics  
6 theory, diversifying evolution through ecological interaction is called evolutionary  
7 branching. This study analytically develops conditions for evolutionary branching in  
8 distorted trait spaces of arbitrary dimensions, by a local nonlinear coordinate  
9 transformation so that the mutational covariance matrix becomes locally constant in  
10 the neighborhood of a focal point. The developed evolutionary branching conditions can  
11 be affected by the distortion when mutational step sizes have significant magnitude  
12 difference among directions, i.e., the eigenvalues of the mutational covariance matrix  
13 have significant magnitude difference.

14

## 15 1 Introduction

16 Biological communities are thought to have been evolving in multi-dimensional trait  
17 spaces (Doebeli and Ispolatov, 2010, 2017), and which are distorted in a sense that  
18 mutability in each direction (i.e., the mutational covariance matrix) varies depending  
19 on the parental phenotype of the mutant. Such a distortion may affect evolutionary  
20 dynamics and outcomes, including directional evolution and diversifying evolution.

21 Directional evolution in distorted trait spaces can be described with an ordinary  
22 differential equation for the resident trait, derived under assumption of the rare and  
23 small mutation limit in adaptive dynamics theory (Dieckmann and Law, 1996), or that  
24 for the mean trait under some assumption on variances and on higher moments of the

1 trait in quantitative genetics (Lande, 1979). In both frameworks, directional evolution  
2 is shown to be proportional to the fitness gradient (or selection gradient) multiplied by  
3 the mutational covariance matrix (or additive genetic covariance matrix). In distorted  
4 trait spaces, the covariance matrix varies depending on the parental phenotypes of  
5 mutants, which can change the speed and/or direction of directional evolution  
6 (explained in Section 2.1).

7       Diversifying evolution, which is a fundamental source of biodiversity, is described  
8 as evolutionary branching in adaptive dynamics theory (Metz et al., 1996; Geritz et al.,  
9 1997). Evolutionary branching explains sympatric and parapatric speciation as  
10 continuous adaptive evolution through ecological interaction (Dieckmann and Doebeli,  
11 1999; Doebeli and Dieckmann, 2003; Dieckmann et al., 2004; Doebeli, 2011). If a space  
12 composed of evolutionary traits has an evolutionary branching point, the point attracts  
13 a monomorphic population through directional selection, and then favors its  
14 diversification through disruptive selection (Geritz et al., 1997). Moreover, a trait space  
15 may have not only evolutionary branching points but also evolutionary branching lines  
16 (Ito and Dieckmann, 2012, 2014), if the trait space has a significant mutability  
17 difference among directions so that mutation in some direction is significantly difficult  
18 compared to the other directions. Analogously to evolutionary branching points, an  
19 evolutionary branching line attracts a monomorphic population and then favors their  
20 evolutionary branching through disruptive selection (Ito and Dieckmann, 2014).

21       So far, in multi-dimensional trait spaces, existence conditions for evolutionary  
22 branching points and lines (for two-dimensional trait spaces), or candidates for them  
23 (for the higher-dimensions, explained in Appendix D), have been developed under  
24 assumption of constant mutational covariance matrices, i.e., no distortion. Thus, a next

1 step is to reveal these conditions in distorted trait spaces.

2 In this paper, we first in the literature analyze the evolutionary branching in  
3 distorted trait spaces. By means of a local coordinate normalization to make the  
4 distortion vanish locally, we formally develop the conditions for evolutionary branching  
5 points and lines for two-dimensional distorted trait spaces. Although the analogous  
6 conditions are obtained in distorted trait spaces of arbitrarily higher dimensions  
7 (Appendix D), for simplicity, we restrict our explanation to two-dimensional trait spaces  
8 in the main text. For convenience, we refer to the conditions for evolutionary branching  
9 points and lines as the branching point conditions and branching line conditions,  
10 respectively.

11 To show with a minimum complexity how the distortion of a trait space affects  
12 evolutionary branching, Section 2 considers a simply distorted trait space and derives  
13 the branching point conditions and branching line conditions. Section 3 derives  
14 analogous results in an arbitrarily distorted trait space. Section 4 is devoted to an  
15 example to show how this theory can be applied. Section 5 discusses the obtained  
16 results in connection with relevant studies.

17

## 18 2 Evolutionary branching in a simply distorted trait space

19 Throughout the paper, we use italic for denoting scalars, bold small letters for column  
20 vectors, and bold capital for matrices. We consider a two-dimensional trait space  $\mathbf{s} =$   
21  $(x, y)^T$  and a monomorphic population with a resident phenotype  $\mathbf{s} = (x, y)^T$ , where  
22  $T$  denotes transpose. From resident  $\mathbf{s}$ , a mutant  $\mathbf{s}' = (x', y')^T$  emerges with a  
23 mutation rate  $\mu$  per birth event. The point  $\mathbf{s}'$  a mutant resides in the trait space  
24 follows a probability density distribution  $m(\mathbf{s}', \mathbf{s})$ , referred to as a “mutation

1 distribution." The shape of  $m(\mathbf{s}', \mathbf{s})$  changes depending on  $\mathbf{s}$ .

## 2 **2.1 Adaptive dynamics theory**

3 To analyze adaptive evolution in the trait space  $\mathbf{s} = (x, y)^T$ , we use one of adaptive  
4 dynamics theories, which is originated from Metz et al. (1996). This theory typically  
5 assumes clonal reproduction, sufficiently rare mutation, and sufficiently large  
6 population size, so that a population is monomorphic and is almost at an equilibrium  
7 density whenever a mutant emerges. In this setting, whether a mutant can invade the  
8 resident is determined by its initial per capita growth rate, called the invasion fitness,  
9  $f(\mathbf{s}', \mathbf{s})$ , which is a function of mutant  $\mathbf{s}'$  and resident  $\mathbf{s}$ . The invasion fitness  $f(\mathbf{s}', \mathbf{s})$   
10 can be translated into a fitness landscape along mutant trait  $\mathbf{s}'$ . The landscape can vary  
11 depending on the resident trait  $\mathbf{s}$ . The mutant can invade the resident only when  
12  $f(\mathbf{s}', \mathbf{s})$  is positive, resulting in substitution of the resident in many cases. Repetition of  
13 such a substitution forms directional evolution toward a higher fitness, as long as the  
14 dominant component of the fitness landscape around  $\mathbf{s}$  is the fitness gradient  
15 (corresponding to directional selection) rather than the fitness curvature  
16 (corresponding to diversifying or purifying selection). When the fitness gradient  
17 becomes small so that the second-order fitness component is not negligible, a mutant  
18 may coexist with its resident, which may bring about evolutionary diversification into  
19 two distinct morphs, called evolutionary branching (Metz et al., 1996; Geritz et al., 1997;  
20 Geritz et al., 1998). Such an evolutionary transition of residents induced by repeated  
21 mutant invasions, including directional evolution and evolutionary branching, is called  
22 a trait substitution sequence (Metz et al., 1996).

23 The expected evolutionary shift of resident phenotype through directional  
24 evolution is approximated as

$$1 \quad \frac{d\mathbf{s}}{dt} = \frac{1}{2} \mu \hat{n} \mathbf{V}_m(\mathbf{s}) \mathbf{g}(\mathbf{s}) \quad (1a)$$

2 (Dieckmann and Law, 1996), where  $\mu$  is the mutation rate,  $\hat{n}$  is the equilibrium  
 3 population density of the resident  $\mathbf{s}$ ,  $\mathbf{V}_m(\mathbf{s})$  is the covariance matrix of the mutation  
 4 distribution  $m(\mathbf{s}', \mathbf{s})$ , and

$$5 \quad \mathbf{g}(\mathbf{s}) = \nabla_{\mathbf{s}'} f(\mathbf{s}, \mathbf{s}) = \left( \begin{array}{c} \frac{\partial f(\mathbf{s}', \mathbf{s})}{\partial x'} \\ \frac{\partial f(\mathbf{s}', \mathbf{s})}{\partial y'} \end{array} \right)_{\mathbf{s}'=\mathbf{s}} \quad (1b)$$

6 is the fitness gradient vector evaluated at the resident trait  $\mathbf{s}$ . Eqs. (1) are applicable  
 7 even when the mutation distribution varies over  $\mathbf{s}$  and so does  $\mathbf{V}_m(\mathbf{s})$ . In this case,  
 8 such a dependency affects not only the speed of directional evolution but also its  
 9 direction (Fig.1).

## 10 **2.2 Assumption for mutation**

11 As for evolutionary branching in two-dimensional trait spaces, branching point  
 12 conditions (Geritz et al., 2016) and branching line conditions (Ito and Dieckmann, 2012,  
 13 2014) are applicable only for non-distorted trait spaces (i.e., the mutation distribution  
 14 does not depend on the resident phenotype). To apply those branching conditions for  
 15 distorted trait spaces, we assume there exists a nonlinear transformation of the  
 16 coordinate system  $\mathbf{s} = (x, y)^T$  into a new coordinate system  $\tilde{\mathbf{s}} = (\tilde{x}, \tilde{y})^T$  in which the  
 17 mutation distribution can be approximated with a bivariate Gaussian distribution that  
 18 is constant at least locally around a focal point  $\mathbf{s}_0$ . We refer to the coordinates  $\mathbf{s} =$   
 19  $(x, y)^T$  and  $\tilde{\mathbf{s}} = (\tilde{x}, \tilde{y})^T$  as the “original coordinates” and “geodesic coordinates”,  
 20 respectively (the meaning of “geodesic” is explained in Section 3.1). However, if we  
 21 approximate the mutation distribution with a Gaussian distribution in the original  
 22 coordinates  $\mathbf{s}$  (with its covariance matrix given by  $\mathbf{V}_m(\mathbf{s})$ ), the nonlinear coordinate

1 transformation can cause the mutation distribution in the geodesic coordinates  $\tilde{\mathbf{s}}$  to  
 2 deviate from the Gaussian. Such a deviation is not negligible when the mutation  
 3 distribution has a significantly narrow width in one direction compared to the other  
 4 (Fig. 2a). In this case, the branching line conditions are not applicable even in the  
 5 geodesic coordinates  $\tilde{\mathbf{s}}$ . To avoid this difficulty, in this paper we assume the Gaussian  
 6 approximation not before but after the coordinate transformation (Fig. 2b). This choice  
 7 has an advantage that we can express mutants restricted to constraint curves  
 8 completely or incompletely (left panel in Fig. 2b).

9 To show with a minimal complexity how distortion of a trait space affects  
 10 evolutionary branching conditions, we assume that the nonlinear transformation from  
 11 the original coordinates  $\mathbf{s} = (x, y)^T$  (around the focal point  $\mathbf{s}_0 = (x_0, y_0)^T$ ) into the  
 12 geodesic coordinates  $\tilde{\mathbf{s}} = (\tilde{x}, \tilde{y})^T$  is given by

$$\begin{aligned} x &= \tilde{x}, \\ y &= \tilde{y} + \frac{\rho}{2} [\tilde{x} - x_0]^2, \end{aligned} \quad (2)$$

13 with a single parameter  $\rho$  for controlling the degree of distortion (Fig. 2b). In addition,  
 14 we assume that the mutation distribution in the geodesic coordinates  $\tilde{\mathbf{s}}$  is a constant  
 15 bivariate Gaussian distribution,  
 16

$$\begin{aligned} \tilde{m}(\tilde{\mathbf{s}}', \tilde{\mathbf{s}}) &= \frac{1}{2\pi\sqrt{|\mathbf{V}^{-1}|}} \exp\left(-\frac{1}{2} [\tilde{\mathbf{s}}' - \tilde{\mathbf{s}}]^T \mathbf{V}^{-1} [\tilde{\mathbf{s}}' - \tilde{\mathbf{s}}]\right) \\ &= \frac{1}{2\pi\sigma_x\sigma_y} \exp\left(-\frac{[\tilde{x}' - \tilde{x}]^2}{2\sigma_x^2} - \frac{[\tilde{y}' - \tilde{y}]^2}{2\sigma_y^2}\right), \\ \mathbf{V} &= \begin{pmatrix} \sigma_x^2 & 0 \\ 0 & \sigma_y^2 \end{pmatrix}, \end{aligned} \quad (3)$$

17 as illustrated in the right side of Fig. 2b. Then, expressing  $\tilde{m}(\tilde{\mathbf{s}}', \tilde{\mathbf{s}})$  in the original  
 18 coordinates  $\mathbf{s}$  gives the mutation distribution  $m(\mathbf{s}', \mathbf{s})$  that varies depending on  $\mathbf{s}$ , as  
 19 illustrated in the left side of Fig. 2b (see Appendix A.1 for the derivation of  $m(\mathbf{s}', \mathbf{s})$ ).  
 20

1 The  $\sigma_x$  and  $\sigma_y$  describe the standard deviations of mutation along the  $\tilde{x}$ - and  $\tilde{y}$ -  
2 directions, respectively. When  $\sigma_y$  is very small, mutants deriving from an ancestral  
3 resident  $\tilde{\mathbf{s}}_a = (\tilde{x}_a, \tilde{y}_a)^T$  are almost restricted to a line  $\tilde{y} = \tilde{y}_a$  (i.e.,  $y = \tilde{y}_a + \frac{\rho}{2}[x -$   
4  $x_0]^2$ ), but can deviate slightly from it (Fig. 2b).

5 The local distortion defined by Eqs. (2) and (3) is a special case that is much  
6 simpler than a general expression for the local distortion defined by Eqs. (11) in the  
7 next section. However, the branching point conditions and branching line conditions  
8 derived in this simple case are essentially the same with those in the general case  
9 (Section 3.3-3.4). In this sense, the special case analyzed here has a certain generality.

10 By substituting Eqs. (2) into the invasion fitness function  $f(\mathbf{s}', \mathbf{s})$  in the original  
11 coordinates  $\mathbf{s}$ , we obtain the invasion fitness function in the geodesic coordinates  $\tilde{\mathbf{s}}$ ,  
12 referred to as the “geodesic invasion fitness”,

$$13 \quad \tilde{f}(\tilde{\mathbf{s}}', \tilde{\mathbf{s}}) = f\left(\left(\tilde{x}', \tilde{y}' + \frac{\rho}{2}[x' - x_0]^2\right)^T, \left(\tilde{x}, \tilde{y} + \frac{\rho}{2}[x - x_0]^2\right)^T\right). \quad (4)$$

14 Note that the constant Gaussian mutation distribution in the geodesic coordinates  $\tilde{\mathbf{s}}$   
15 allows application of the branching point conditions and branching line conditions. The  
16 contribution of  $\rho$  on those conditions shows how distortion of the trait space affects  
17 them.

### 18 **2.3 Quadratic approximation of invasion fitness functions**

19 Both of the branching point conditions and branching line conditions depend only on  
20 the first and second derivatives of invasion fitness functions with respect to mutant and  
21 resident phenotypes. Thus, to facilitate analysis, we apply quadratic approximation to  
22 the original and geodesic invasion fitness functions,  $f(\mathbf{s}', \mathbf{s})$  and  $\tilde{f}(\tilde{\mathbf{s}}', \tilde{\mathbf{s}})$ , without loss  
23 of generality. Since the resident phenotype is at population dynamical equilibrium,  
24  $f(\mathbf{s}, \mathbf{s}) = 0$  must hold for any  $\mathbf{s}$ . Then, following Ito and Dieckmann (2014), we expand



1  $f(\mathbf{s}', \mathbf{s})$  around the focal point  $\mathbf{s}_0$  in the form of

$$2 \quad f(\mathbf{s}', \mathbf{s}) = \mathbf{g}^T \delta \mathbf{s} + [\mathbf{s} - \mathbf{s}_0]^T \mathbf{C} \delta \mathbf{s} + \frac{1}{2} \delta \mathbf{s}^T \mathbf{D} \delta \mathbf{s} + \text{h. o. t.} \quad (5a)$$

3 with  $\delta \mathbf{s} = \mathbf{s}' - \mathbf{s}$ ,

$$\mathbf{g} = \begin{pmatrix} g_x \\ g_y \end{pmatrix} = \nabla_{\mathbf{s}'} f(\mathbf{s}_0, \mathbf{s}_0) = \begin{pmatrix} f_{x'} \\ f_{y'} \end{pmatrix},$$

$$\mathbf{D} = \begin{pmatrix} D_{xx} & D_{xy} \\ D_{xy} & D_{yy} \end{pmatrix} = \nabla_{\mathbf{s}'} \nabla_{\mathbf{s}'}^T f(\mathbf{s}_0, \mathbf{s}_0) = \begin{pmatrix} f_{x'x'} & f_{x'y'} \\ f_{x'y'} & f_{y'y'} \end{pmatrix},$$

4

$$\mathbf{C} = \begin{pmatrix} C_{xx} & C_{xy} \\ C_{yx} & C_{yy} \end{pmatrix} = \mathbf{D} + \nabla_{\mathbf{s}} \nabla_{\mathbf{s}'}^T f(\mathbf{s}_0, \mathbf{s}_0),$$

$$\nabla_{\mathbf{s}} \nabla_{\mathbf{s}'}^T f(\mathbf{s}_0, \mathbf{s}_0) = \begin{pmatrix} f_{xx'} & f_{xy'} \\ f_{yx'} & f_{yy'} \end{pmatrix} \quad (5b)$$

5 (Appendix B), where  $f_{\alpha} = \partial f(\mathbf{s}', \mathbf{s}) / \partial \alpha$  for  $\alpha = x', y', x, y$  and  $f_{\alpha\beta} = \partial^2 f(\mathbf{s}', \mathbf{s}) /$   
6  $\partial \alpha \partial \beta$  for  $\alpha, \beta = x', y', x, y$  denote the first and second derivatives of  $f(\mathbf{s}', \mathbf{s})$ ,  
7 respectively, evaluated at  $\mathbf{s}' = \mathbf{s} = \mathbf{s}_0$ . Note that  $f(\mathbf{s}', \mathbf{s})$  can be treated as a fitness  
8 landscape along  $\mathbf{s}'$ , which varies depending on  $\mathbf{s}$ . When  $\mathbf{g} = \mathbf{0}$ , i.e., the point  $\mathbf{s}_0$  is  
9 evolutionary singular (Geritz et al., 1997), the curvature of the fitness landscape along  
10 a vector  $\mathbf{v}$  is given by  $\mathbf{v}^T \mathbf{D} \mathbf{v} / |\mathbf{v}|^2$ . In other words, the signs of the two real eigenvalues  
11 of  $\mathbf{D}$  determines whether the point  $\mathbf{s}_0$  is a mountain top (locally evolutionarily stable  
12 (Maynard Smith and Price, 1973)), a basin bottom (evolutionarily unstable in all  
13 directions), or a saddle point (evolutionarily unstable in some directions). Even when  
14  $\mathbf{g} \neq \mathbf{0}$ , the sign of  $\mathbf{v}^T \mathbf{D} \mathbf{v} / |\mathbf{v}|^2$  tells whether the fitness landscape is locally convex or  
15 concave along  $\mathbf{v}$ . In this sense, we refer to  $\mathbf{D}$  as the “fitness curvature”.

16 For resident  $\mathbf{s}$  deviated slightly from the focal point  $\mathbf{s}_0$ , the fitness gradient at  $\mathbf{s}$   
17 is approximately given by

$$1 \quad \nabla_{\mathbf{s}'} f(\mathbf{s}, \mathbf{s}) = \left( \frac{\partial f(\mathbf{s}', \mathbf{s})}{\partial x'} \right)_{\mathbf{s}'=\mathbf{s}} = \mathbf{g} + \mathbf{C}^T [\mathbf{s} - \mathbf{s}_0]. \quad (5c)$$

2 Thus, the matrix  $\mathbf{C}$  describes the change rate of the fitness gradient when the resident  
 3 deviates from  $\mathbf{s}_0$ . In this sense, we refer to  $\mathbf{C}$  as the “fitness gradient variability.” When  
 4  $\mathbf{g} = \mathbf{0}$ , the Jacobian matrix  $\mathbf{J} = \mathbf{V}_m(\mathbf{s}_0)\mathbf{C}^T$  determines the local stability of  $\mathbf{s}_0$  through  
 5 directional evolution described by Eqs. (1) with Eq. (5c). Thus, if the all eigenvalues of  
 6  $\mathbf{J}$  have negative real parts, then the point  $\mathbf{s}_0$  is locally stable through directional  
 7 evolution. Whenever the symmetric part of  $\mathbf{C}$  is negative definite, the all eigenvalues of  
 8  $\mathbf{J}$  have negative real parts as far as  $\mathbf{V}_m(\mathbf{s}_0)$  is non-singular (i.e., mutation is possible in  
 9 all directions), in which case  $\mathbf{s}_0$  is called a strongly convergence stable point (Leimar,  
 10 2009).

11 Substituting Eqs. (2) into Eqs. (5) gives the quadratic form for the geodesic  
 12 invasion fitness function,

$$13 \quad \tilde{f}(\tilde{\mathbf{s}}', \tilde{\mathbf{s}}) = \tilde{\mathbf{g}}^T \delta \tilde{\mathbf{s}} + [\tilde{\mathbf{s}} - \mathbf{s}_0]^T \tilde{\mathbf{C}} \delta \tilde{\mathbf{s}} + \frac{1}{2} \delta \tilde{\mathbf{s}}^T \tilde{\mathbf{D}} \delta \tilde{\mathbf{s}} + \text{h. o. t.}, \quad (6a)$$

14 with  $\delta \tilde{\mathbf{s}} = \tilde{\mathbf{s}}' - \tilde{\mathbf{s}}$ ,

$$15 \quad \begin{aligned} \tilde{\mathbf{g}} &= \begin{pmatrix} \tilde{g}_x \\ \tilde{g}_y \end{pmatrix} = \mathbf{g}, \\ \tilde{\mathbf{C}} &= \begin{pmatrix} \tilde{C}_{xx} & \tilde{C}_{xy} \\ \tilde{C}_{yx} & \tilde{C}_{yy} \end{pmatrix} = \mathbf{C} + \mathbf{\Omega}, \\ \tilde{\mathbf{D}} &= \begin{pmatrix} \tilde{D}_{xx} & \tilde{D}_{xy} \\ \tilde{D}_{xy} & \tilde{D}_{yy} \end{pmatrix} = \mathbf{D} + \mathbf{\Omega}, \end{aligned} \quad (6b)$$

16 and

$$17 \quad \mathbf{\Omega} = \begin{pmatrix} \rho g_y & 0 \\ 0 & 0 \end{pmatrix}. \quad (6c)$$

18 Since  $\tilde{\mathbf{g}} = \nabla_{\tilde{\mathbf{s}}'} \tilde{f}(\mathbf{s}_0, \mathbf{s}_0)$ ,  $\tilde{\mathbf{C}} = \tilde{\mathbf{D}} + \nabla_{\tilde{\mathbf{s}}} \nabla_{\tilde{\mathbf{s}}'}^T \tilde{f}(\mathbf{s}_0, \mathbf{s}_0)$ , and  $\tilde{\mathbf{D}} = \nabla_{\tilde{\mathbf{s}}'} \nabla_{\tilde{\mathbf{s}}}^T \tilde{f}(\mathbf{s}_0, \mathbf{s}_0)$  hold, they

1 respectively describe the fitness gradient, fitness gradient variability, and fitness  
 2 curvature at the focal point  $\mathbf{s}_0$  in the geodesic coordinates  $\tilde{\mathbf{s}}$ . Note that  $\mathbf{C}$  and  $\mathbf{D}$  in  
 3 the original coordinates  $\mathbf{s}$  are respectively integrated with the “distortion effect”  $\mathbf{\Omega}$ ,  
 4 into  $\tilde{\mathbf{C}}$  and  $\tilde{\mathbf{D}}$  in the geodesic coordinates  $\tilde{\mathbf{s}}$ . On the basis of the local coordinate  
 5 normalization above, we derive the conditions for the focal point  $\mathbf{s}_0$  being an  
 6 evolutionary branching point (branching point conditions), and the conditions for  
 7 existence of an evolutionary branching line containing  $\mathbf{s}_0$  (branching line conditions),  
 8 in the following subsections.

## 9 **2.4 Conditions for evolutionary branching points**

10 An evolutionary branching point attracts a monomorphic population in its  
 11 neighborhood through directional evolution, and then favors its diversification into two  
 12 morphs that directionally evolve in opposite directions (Metz et al., 1996; Geritz et al.,  
 13 1997). Conditions for existence of evolutionary branching points, i.e., branching point  
 14 conditions, have been derived originally in one-dimensional trait spaces (Geritz et al.,  
 15 1997). For two-dimensional non-distorted trait spaces, the branching point conditions  
 16 have been proved by approximating the latter diversification process with coupled  
 17 Lande equations (Geritz et al. 2016). By expressing these two-dimensional branching  
 18 point conditions in the geodesic coordinates  $\tilde{\mathbf{s}} = (\tilde{x}, \tilde{y})^T$ , we derive the branching point  
 19 conditions for the simply distorted trait space  $\mathbf{s} = (x, y)^T$ . Specifically, we obtain the  
 20 following conditions for the focal point  $\mathbf{s}_0$  being an evolutionary branching point.

21 (i)  $\mathbf{s}_0$  is evolutionarily singular, satisfying

$$22 \quad \tilde{\mathbf{g}} = \mathbf{g} = \mathbf{0}. \quad (7a)$$

23 (ii)  $\mathbf{s}_0$  is strongly convergence stable, i.e., the symmetric part of

$$24 \quad \tilde{\mathbf{C}} = \mathbf{C} + \mathbf{\Omega} = \mathbf{C} + \begin{pmatrix} \rho g_y & 0 \\ 0 & 0 \end{pmatrix} \quad (7b)$$

1 is negative definite.

2 (iii)  $\mathbf{s}_0$  is evolutionarily unstable, i.e., a symmetric matrix

3 
$$\tilde{\mathbf{D}} = \mathbf{D} + \mathbf{\Omega} = \mathbf{D} + \begin{pmatrix} \rho g_y & 0 \\ 0 & 0 \end{pmatrix} \quad (7c)$$

4 has at least one positive eigenvalue, in which case the fitness landscape is concave  
5 along at least one direction.

6

7 Since Eq. (7a) requires  $g_x = g_y = 0$ , we see  $\tilde{\mathbf{C}} = \mathbf{C}$  and  $\tilde{\mathbf{D}} = \mathbf{D}$ . This means that the  
8 branching point conditions in the geodesic coordinates  $\tilde{\mathbf{s}}$  are equivalent to those in the  
9 original coordinates  $\mathbf{s}$ . Thus, the simple distortion of the trait space, controlled by  $\rho$  in  
10 Eqs. 2, does not affect the branching point conditions.

## 11 2.5 Conditions for evolutionary branching lines

12 As long as  $\sigma_y$  has a comparable magnitude with  $\sigma_x$ , evolutionary branching is  
13 expected only around the evolutionary branching points (Ito and Dieckmann, 2014). On  
14 the other hand, if  $\sigma_y$  is extremely smaller than  $\sigma_x$ , the resulting slower evolutionary  
15 change in  $\tilde{y}$  is negligible during the faster evolution in  $\tilde{x}$ , so that the evolutionary  
16 dynamics in the faster time scale can be described in a one-dimensional trait space  $\tilde{x}$   
17 under fixed  $\tilde{y}$ . In this case, a point satisfying the one-dimensional conditions for  
18 evolutionary branching points (Geritz, et al. 1997) in  $\tilde{x}$  can induce evolutionary  
19 branching in  $\tilde{x}$ . Even if  $\sigma_y$  is not extremely small, this type of evolutionary branching  
20 is likely to occur, as long as the disruptive selection along  $\tilde{x}$ , measured by  $\frac{1}{2}\tilde{D}_{xx}\sigma_x^2$ , is  
21 sufficiently stronger than the directional selection along  $\tilde{y}$ , measured by  $\tilde{g}_y\sigma_y$  (Ito and  
22 Dieckmann, 2007, 2014). The conditions for this type of evolutionary branching are  
23 called the conditions for evolutionary branching lines or the branching line conditions,

1 because points that satisfy those conditions often form lines in trait spaces, called  
 2 evolutionary branching lines (Ito and Dieckmann, 2014).

3 To facilitate application of the branching line conditions, we simplify the original  
 4 branching line conditions, following Ito and Dieckmann (2014) (see Appendix C.1-3 for  
 5 details of the original branching line conditions and the simplification). Specifically,  
 6 when  $\sigma_y$  is much smaller than  $\sigma_x$  so that  $\sigma_y = O(\sigma_x^2)$  with  $\sigma_x \ll 1$  (i.e.,  $\sigma_y$  has no  
 7 larger magnitude than  $\sigma_x^2$ ), following Ito and Dieckmann (2014), we can further  
 8 simplify Eq. (6a) into

$$9 \quad \tilde{f}(\tilde{\mathbf{s}}', \tilde{\mathbf{s}}) = \tilde{g}_x \delta \tilde{x} + \tilde{g}_y \delta \tilde{y} + \tilde{C}_{xx} [\tilde{x} - x_0] \delta \tilde{x} + \frac{1}{2} \tilde{D}_{xx} \delta \tilde{x}^2 + O(\sigma_x^3), \quad (8a)$$

10 with

$$\tilde{g}_x = g_x,$$

$$11 \quad \tilde{C}_{xx} = C_{xx} + \Omega_{xx},$$

$$\tilde{D}_{xx} = D_{xx} + \Omega_{xx}, \quad (8b)$$

12 and

$$13 \quad \Omega_{xx} = \rho g_y, \quad (8c)$$

14 where terms with  $\tilde{C}_{xy}$ ,  $\tilde{C}_{yx}$ ,  $\tilde{C}_{yy}$ ,  $\tilde{D}_{xy}$ , and  $\tilde{D}_{yy}$  are subsumed in  $O(\sigma_x^3)$ . Note that this  
 15 simplification is allowed even when  $\sigma_y$  is not much smaller than  $\sigma_x$ , as long as  
 16 magnitudes of  $\tilde{C}_{xy}$ ,  $\tilde{C}_{yx}$ ,  $\tilde{C}_{yy}$ ,  $\tilde{D}_{xy}$ , and  $\tilde{D}_{yy}$  are all sufficiently small instead. According  
 17 to Appendix B in Ito and Dieckmann (2014), Eqs. (8) hold when the sensitivity of the  
 18 geodesic invasion fitness,  $\tilde{f}(\tilde{\mathbf{s}}', \tilde{\mathbf{s}})$ , to single mutational changes of  $\tilde{\mathbf{s}}'$  and  $\tilde{\mathbf{s}}$  is  
 19 significantly lower in  $\tilde{y}$  than in  $\tilde{x}$ , satisfying

$$20 \quad \frac{\frac{\sigma_y}{\sigma_x} [|\tilde{g}_y| + |\tilde{C}_{xy}| + |\tilde{C}_{yx}| + |\tilde{D}_{xy}|] + \frac{\sigma_y^2}{\sigma_x^2} [|\tilde{C}_{yy}| + |\tilde{D}_{yy}|]}{|\tilde{g}_x| + |\tilde{C}_{xx}| + |\tilde{D}_{xx}|} = O(\sigma_x). \quad (9a)$$

21 On this basis, the simplified branching line conditions are described as follows:

1 (i) At  $\mathbf{s}_0$  the sensitivity of  $\tilde{f}(\tilde{\mathbf{s}}', \tilde{\mathbf{s}})$  to single mutational changes of  $\tilde{\mathbf{s}}'$  and  $\tilde{\mathbf{s}}$  is  
 2 significantly lower in  $\tilde{y}$  than in  $\tilde{x}$ , satisfying Eq. (9a).

3 (ii)  $\mathbf{s}_0$  is evolutionarily singular along  $\tilde{x}$ , satisfying

$$4 \quad \tilde{g}_x = g_x = 0. \quad (9b)$$

5 (iii)  $\mathbf{s}_0$  is convergence stable along  $\tilde{x}$ , satisfying

$$6 \quad \tilde{C}_{xx} = C_{xx} + \Omega_{xx} < 0. \quad (9c)$$

7 (iv)  $\mathbf{s}_0$  is sufficiently evolutionarily unstable (i.e., subject to sufficiently strong  
 8 disruptive selection) along  $\tilde{x}$ , satisfying

$$9 \quad \frac{\sigma_x^2 \tilde{D}_{xx}}{\sigma_y |\tilde{g}_y|} = \frac{\sigma_x^2 [D_{xx} + \Omega_{xx}]}{\sigma_y |g_y|} > \sqrt{2}. \quad (9d)$$

10

11 Note that condition (ii) above does not require  $g_y = 0$ , and thus  $\Omega_{xx} = \rho g_y$  may  
 12 remain nonzero in Eqs. (9c) and (9d). Thus, differently from the branching point  
 13 conditions, distortion of the trait space affects the branching line conditions through  
 14  $\Omega_{xx} = \rho g_y$ , as long as the fitness gradient along the  $y$ -axis,  $g_y$ , exists.

15 Existence of an evolutionary branching line ensures the occurrence of evolutionary  
 16 branching of a monomorphic population located in its neighborhood, in the maximum  
 17 likelihood invasion-event path, i.e., a trait substitution sequence composed of mutant-  
 18 invasion events each of which has the maximum likelihood (Ito and Dieckmann 2014).

19 When  $\sigma_y = 0$ , the evolutionary trajectory starting from the focal point  $\mathbf{s}_0$  in the  
 20 geodesic coordinates  $\tilde{\mathbf{s}} = (\tilde{x}, \tilde{y})^T$  is completely restricted to the line  $\tilde{y} = y_0$ , which  
 21 forms a parabolic curve in the original coordinates  $\mathbf{s} = (x, y)^T$ ,

$$22 \quad y = \frac{\rho}{2} [x - x_0]^2 + y_0 \quad (10)$$

23 (green curves in Fig. 2b). In this case, condition (i) always holds and condition (iv) is  
 24 simplified into  $\tilde{D}_{xx} = D_{xx} + \Omega_{xx} > 0$ , and thus conditions (ii-iv) become the one-

1 dimensional branching point conditions (Geritz et al., 1997) in  $\tilde{x}$  treated as a one-  
2 dimensional trait space. In the original coordinates  $\mathbf{s} = (x, y)^T$ , conditions (ii-iv) give  
3 the conditions for evolutionary branching point along a constraint curve locally  
4 approximated in the form of Eq. (10), and which are identical to the three conditions  
5 derived by Ito and Sasaki (2016) with an extended Lagrange multiplier method. Thus,  
6 the above conditions with  $\sigma_y > 0$  extend the conditions by Ito and Sasaki (2016) for  
7 the case allowing slight mutational deviations from the constraint curves, i.e., when the  
8 constraints are incomplete.

9       Although this section focuses on one of the simplest configurations among possible  
10 local distortions for two-dimensional trait spaces, the obtained results are already  
11 useful in analyses of eco-evolutionary models defined on two-dimensional trait spaces  
12 with constraint curves deriving from various trade-offs (e.g., trade-offs between  
13 competitive ability and grazing susceptibility of primary producers (Branco et al., 2010),  
14 foraging gain and predation risk of consumers (Abrams, 2003), specialist and generalist  
15 of consumers (Egas et al., 2004), transmission and virulence of parasites (Kamo et al.,  
16 2006), competitive ability and attack rate (or longevity) of parasitoids (Bonsal et al.,  
17 2004), and fecundity and dispersal (Weigang and Kisdi, 2015)). Specifically, by an  
18 appropriate rotation around a focal point (Fig. 3a to 3b) and obtaining the geodesic  
19 coordinates (Fig. 3b to 3c), we can apply the branching line conditions, Eqs. (9), which  
20 tells likelihoods of evolutionary branching in those models when the constraint curves  
21 are incomplete as well as complete.

22

### 23 **3 Evolutionary branching in an arbitrarily distorted trait space**

24 The above analysis in the simply distorted trait space showed that distortion of the trait

1 space controlled by  $\rho$  does not affect the branching point conditions but does affect  
 2 the branching line conditions. Analogous results are obtained for an arbitrarily  
 3 distorted trait space of an arbitrarily higher dimension, as shown in Appendix D. In this  
 4 section, for simplicity, we explain the obtained results mainly in an arbitrarily distorted  
 5 two-dimensional trait space, denoted by  $\mathbf{s} = (x, y)^T$ .

### 6 **3.1 Assumption for mutation**

7 We generalize the assumption for the simply distorted trait space (Section 2.2) as  
 8 follows (illustrated in Fig. 4a and 4b).

#### 9 **Geodesic-constant-mutation assumption:**

10 For an arbitrary point  $\mathbf{s}_0 = (x_0, y_0)^T$  in an arbitrarily distorted trait space  $\mathbf{s} = (x, y)^T$ ,  
 11 there exist the geodesic coordinates  $\tilde{\mathbf{s}} = (\tilde{x}, \tilde{y})^T$  defined by

$$\begin{aligned}
 12 \quad x &= \tilde{x} - \frac{1}{2} [Q_{xx}^x (\tilde{x} - x_0)^2 + 2Q_{xy}^x (\tilde{x} - x_0)(\tilde{y} - y_0) + Q_{yy}^x (\tilde{y} - y_0)^2], \\
 13 \quad y &= \tilde{y} - \frac{1}{2} [Q_{xx}^y (\tilde{x} - x_0)^2 + 2Q_{xy}^y (\tilde{x} - x_0)(\tilde{y} - y_0) + Q_{yy}^y (\tilde{y} - y_0)^2], \quad (11a)
 \end{aligned}$$

13 with an appropriately chosen  $Q$ s, such that the mutation distribution in the geodesic  
 14 coordinates  $\tilde{\mathbf{s}}$  can be approximated with a constant bivariate Gaussian distribution,

$$15 \quad \tilde{m}(\tilde{\mathbf{s}}', \tilde{\mathbf{s}}) \simeq \frac{1}{2\pi\sqrt{|\mathbf{V}(\mathbf{s}_0)|}} \exp\left(-\frac{1}{2}[\tilde{\mathbf{s}}' - \tilde{\mathbf{s}}]^T \mathbf{V}(\mathbf{s}_0)^{-1} [\tilde{\mathbf{s}}' - \tilde{\mathbf{s}}]\right), \quad (11b)$$

16 for a resident  $\tilde{\mathbf{s}}$  in the neighborhood of  $\mathbf{s}_0$ , satisfying

$$17 \quad |\mathbf{v}_x^T [\tilde{\mathbf{s}} - \mathbf{s}_0]| = O(\sigma_x), \quad |\mathbf{v}_y^T [\tilde{\mathbf{s}} - \mathbf{s}_0]| = O(\sigma_y) \quad (11c)$$

18 with a sufficiently small  $\sigma_x$  and  $\sigma_y$ , where  $\sigma_x^2$  and  $\sigma_y^2$  are the two eigenvalues of  
 19  $\mathbf{V}(\mathbf{s}_0)$  with corresponding eigenvectors  $\mathbf{v}_x$  and  $\mathbf{v}_y$ , respectively, and  $\sigma_x \geq \sigma_y \geq 0$   
 20 is assumed without loss of generality.

21

22 The matrix  $\mathbf{V}(\mathbf{s})$  in Eq. (11b) is symmetric and positive definite, referred to as a



1 “mutational covariance matrix” or “mutational covariance”,

$$2 \quad \mathbf{V}(\mathbf{s}) = \begin{pmatrix} V_{xx}(\mathbf{s}) & V_{xy}(\mathbf{s}) \\ V_{xy}(\mathbf{s}) & V_{yy}(\mathbf{s}) \end{pmatrix}. \quad (12a)$$

3 Each of the six  $Q$ s in Eqs. (11a) correspond to each mode of local distortion for a trait  
4 space (Fig. 5). For a given  $\mathbf{V}(\mathbf{s})$ , we choose  $Q_{\alpha\beta}^{\gamma}$  for  $\alpha, \beta, \gamma \in \{x, y\}$  as

$$5 \quad Q_{\alpha\beta}^{\gamma} = \frac{1}{2} V_{\gamma x}(\mathbf{s}_0) \left[ \Lambda_{\alpha x}^{\beta} + \Lambda_{\beta x}^{\alpha} - \Lambda_{\alpha\beta}^x \right] + \frac{1}{2} V_{\gamma y}(\mathbf{s}_0) \left[ \Lambda_{\alpha y}^{\beta} + \Lambda_{\beta y}^{\alpha} - \Lambda_{\alpha\beta}^y \right], \quad (12b)$$

6 with

$$7 \quad \begin{pmatrix} \Lambda_{xx}^x & \Lambda_{xy}^x \\ \Lambda_{xy}^x & \Lambda_{yy}^x \end{pmatrix} = \left[ \frac{\partial \mathbf{V}(\mathbf{s})^{-1}}{\partial x} \right]_{\mathbf{s}=\mathbf{s}_0}, \quad \begin{pmatrix} \Lambda_{xx}^y & \Lambda_{xy}^y \\ \Lambda_{xy}^y & \Lambda_{yy}^y \end{pmatrix} = \left[ \frac{\partial \mathbf{V}(\mathbf{s})^{-1}}{\partial y} \right]_{\mathbf{s}=\mathbf{s}_0}, \quad (12c)$$

8 so that  $\mathbf{V}(\mathbf{s})^{-1}$  has no linear dependency on  $\tilde{\mathbf{s}}$  at the focal point  $\mathbf{s}_0$  (in order to  
9 satisfy Eq. (11b)). In differential geometry,  $Q_{\alpha\beta}^{\gamma}$  are called the Christoffel symbols of  
10 the second kind at  $\mathbf{s}_0$  in the original coordinates  $\mathbf{s}$  with respect to the metric  $\mathbf{V}(\mathbf{s})^{-1}$   
11 (see Section 3 in Hobson et al. (2006) for introduction to Christoffel symbols and  
12 geodesic coordinates). For example, in the simply distorted trait space in Section 2 (Eqs.  
13 (2)), the focal point  $\mathbf{s}_0$  has  $Q_{xx}^y = -\rho$  and  $Q_{\alpha\beta}^{\gamma} = 0$  for the all other  $\alpha, \beta, \gamma \in \{x, y\}$ .  
14 We refer to the inverse of the mutational covariance,  $\mathbf{V}(\mathbf{s})^{-1}$ , as the “mutational metric”,  
15 with which we can describe the mutational square distance from  $\mathbf{s}$  to  $\mathbf{s} + d\mathbf{s}$  with  
16 infinitesimal  $d\mathbf{s} = (dx, dy)^T$  as

$$17 \quad dl^2 = d\mathbf{s}^T \mathbf{V}(\mathbf{s})^{-1} d\mathbf{s}. \quad (13)$$

18 Based on the mutational covariance  $\mathbf{V}(\mathbf{s})$ , we formally define “distorted trait  
19 spaces” as trait spaces with non-constant  $\mathbf{V}(\mathbf{s})$ . (This “distortion” corresponding to the  
20 first derivatives of metrics is different from the “distortion” in differential geometry  
21 defined by the second derivatives of metrics (Hobson et al., 2006).) Although the  
22 plausibility of the geodesic-constant-mutation assumption above must be examined by  
23 empirical data, this assumption provides one of the simplest frameworks that allow

1 analytical treatment of evolutionary branching in distorted trait spaces.

2 In Figs. 4 and 5, the mutational covariance at each point  $\mathbf{s}_0$  is expressed as an  
3 ellipse,

$$4 \quad (\mathbf{s} - \mathbf{s}_0)^T \mathbf{V}(\mathbf{s}_0)^{-1} (\mathbf{s} - \mathbf{s}_0) = 1, \quad (14a)$$

5 referred to as a “mutation ellipse”, which indicates the standard deviation of  $\tilde{m}(\tilde{\mathbf{s}}', \mathbf{s}_0)$   
6 (the mutation distribution described in the geodesic coordinates) along each direction  
7 in the geodesic coordinates  $\tilde{\mathbf{s}}$  (overlaid on coordinates  $\mathbf{s}$ ), with its maximum and  
8 minimum given by  $\sigma_x$  and  $\sigma_y$ , respectively. Expressing  $\tilde{m}(\tilde{\mathbf{s}}', \mathbf{s}_0)$  in the original  
9 coordinates  $\mathbf{s}$  gives the mutation distribution  $m(\mathbf{s}', \mathbf{s}_0)$  in the original coordinates  
10 (see Appendix A.2 for the derivation). For  $\sigma_x$  and  $\sigma_y$  having comparable magnitudes,  
11  $m(\mathbf{s}', \mathbf{s}_0) \simeq \tilde{m}(\tilde{\mathbf{s}}', \mathbf{s}_0)$  holds for sufficiently small  $\sigma_x$ . In this case, the covariance matrix  
12  $\mathbf{V}_m(\mathbf{s}_0)$  of  $m(\mathbf{s}', \mathbf{s}_0)$  is approximately given by the mutational covariance  $\mathbf{V}(\mathbf{s}_0)$ , and  
13 the mutation ellipse is approximately the same with the contour for  $m(\mathbf{s}', \mathbf{s}_0)$  at  
14 density level

$$15 \quad \exp\left(-\frac{1}{2}\right) \max_{\mathbf{s}'}(m(\mathbf{s}', \mathbf{s}_0)), \quad (14b)$$

16 referred to as the “mutation contour” (red closed-curves in Figs. 2 and 3). On the other  
17 hand, when  $\sigma_y$  is much smaller than  $\sigma_x$ , the mutation contour non-negligibly deviates  
18 from the mutation ellipse (Fig. 6). In this case, using  $\mathbf{V}(\mathbf{s})$  in stead of  $\mathbf{V}_m(\mathbf{s})$  in Eq. (1a)  
19 may give a better description for directional evolution (see Appendix E for the details).

## 20 **3.2 Quadratic approximation of invasion fitness functions**

21 To reduce complexity of the expressions in the subsequent analysis, without loss of  
22 generality we assume that coordinates  $\mathbf{s} = (x, y)^T$  are first rotated so that  $\mathbf{V}(\mathbf{s}_0)$   
23 becomes a diagonal matrix expressed as

$$1 \quad \mathbf{V}(\mathbf{s}_0) = \begin{pmatrix} \sigma_x^2 & 0 \\ 0 & \sigma_y^2 \end{pmatrix}, \quad (15)$$

2 and then the geodesic coordinates  $\tilde{\mathbf{s}} = (\tilde{x}, \tilde{y})^T$  are obtained (Fig. 4c-e). In this case, Eqs.  
 3 (11c) become  $|\tilde{x} - x_0| = O(\sigma_x)$  and  $|\tilde{y} - y_0| = O(\sigma_y)$ . For convenience, we express  
 4 Eqs. (11a) in a vector-matrix form, as

$$5 \quad \mathbf{s} = \tilde{\mathbf{s}} - \frac{1}{2} \begin{pmatrix} [\tilde{\mathbf{s}} - \mathbf{s}_0]^T \mathbf{Q}^x [\tilde{\mathbf{s}} - \mathbf{s}_0] \\ [\tilde{\mathbf{s}} - \mathbf{s}_0]^T \mathbf{Q}^y [\tilde{\mathbf{s}} - \mathbf{s}_0] \end{pmatrix},$$

$$6 \quad \mathbf{Q}^x = \begin{pmatrix} Q_{xx}^x & Q_{xy}^x \\ Q_{xy}^x & Q_{yy}^x \end{pmatrix} = \frac{\sigma_x^2}{2} \begin{pmatrix} \Lambda_{xx}^x & \Lambda_{xx}^y \\ \Lambda_{xy}^x & 2\Lambda_{xy}^y - \Lambda_{yy}^x \end{pmatrix},$$

$$7 \quad \mathbf{Q}^y = \begin{pmatrix} Q_{xx}^y & Q_{xy}^y \\ Q_{xy}^y & Q_{yy}^y \end{pmatrix} = \frac{\sigma_y^2}{2} \begin{pmatrix} 2\Lambda_{xy}^x - \Lambda_{xx}^y & \Lambda_{yy}^x \\ \Lambda_{xy}^y & \Lambda_{yy}^y \end{pmatrix}. \quad (16)$$

8 Note that  $\mathbf{Q}^x$  and  $\mathbf{Q}^y$  are both symmetric. We refer to  $\mathbf{Q}^x$  and  $\mathbf{Q}^y$  as “distortion  
 9 matrices.” By substituting Eqs. (16) into the original invasion fitness function,  $f(\mathbf{s}', \mathbf{s})$ ,  
 10 we derive the invasion fitness function in the geodesic coordinates  $\tilde{\mathbf{s}}$ , i.e., the geodesic  
 11 invasion fitness,

$$12 \quad \tilde{f}(\tilde{\mathbf{s}}', \tilde{\mathbf{s}}) = f \left( \tilde{\mathbf{s}}' - \frac{1}{2} \begin{pmatrix} [\tilde{\mathbf{s}}' - \mathbf{s}_0]^T \mathbf{Q}^x [\tilde{\mathbf{s}}' - \mathbf{s}_0] \\ [\tilde{\mathbf{s}}' - \mathbf{s}_0]^T \mathbf{Q}^y [\tilde{\mathbf{s}}' - \mathbf{s}_0] \end{pmatrix}, \tilde{\mathbf{s}} - \frac{1}{2} \begin{pmatrix} [\tilde{\mathbf{s}} - \mathbf{s}_0]^T \mathbf{Q}^x [\tilde{\mathbf{s}} - \mathbf{s}_0] \\ [\tilde{\mathbf{s}} - \mathbf{s}_0]^T \mathbf{Q}^y [\tilde{\mathbf{s}} - \mathbf{s}_0] \end{pmatrix} \right). \quad (17)$$

13 Then, we expand  $f(\mathbf{s}', \mathbf{s})$  in the same form with Eqs. (5), and expand  $\tilde{f}(\tilde{\mathbf{s}}', \tilde{\mathbf{s}})$  in a form  
 14 similar to Eqs. (6), as

$$15 \quad \tilde{f}(\tilde{\mathbf{s}}', \tilde{\mathbf{s}}) = \tilde{\mathbf{g}}^T \delta \tilde{\mathbf{s}} + [\tilde{\mathbf{s}} - \mathbf{s}_0]^T \tilde{\mathbf{C}} \delta \tilde{\mathbf{s}} + \frac{1}{2} \delta \tilde{\mathbf{s}}^T \tilde{\mathbf{D}} \delta \tilde{\mathbf{s}} + \text{h. o. t.}, \quad (18a)$$

16 with

$$\tilde{\mathbf{g}} = \begin{pmatrix} \tilde{g}_x \\ \tilde{g}_y \end{pmatrix} = \mathbf{g},$$

$$\tilde{\mathbf{C}} = \begin{pmatrix} \tilde{C}_{xx} & \tilde{C}_{xy} \\ \tilde{C}_{yx} & \tilde{C}_{yy} \end{pmatrix} = \mathbf{C} + \mathbf{\Omega},$$

$$\tilde{\mathbf{D}} = \begin{pmatrix} \tilde{D}_{xx} & \tilde{D}_{xy} \\ \tilde{D}_{xy} & \tilde{D}_{yy} \end{pmatrix} = \mathbf{D} + \mathbf{\Omega}, \quad (18b)$$

2 and

$$\mathbf{\Omega} = -g_x \mathbf{Q}^x - g_y \mathbf{Q}^y. \quad (18c)$$

4 Note that Eqs. (18) are identical to Eqs. (6), except that Eq. (18c) is different from Eq.  
5 (6c).

### 6 **3.3 Conditions for evolutionary branching points**

7 Analogously to the branching point conditions in the simply distorted trait space  
8 (Section 2.4), we can describe conditions for a point  $\mathbf{s}_0$  being an evolutionary  
9 branching point, as follows.

#### 10 **Branching point conditions in arbitrarily distorted two-dimensional trait spaces:**

11 In an arbitrarily distorted trait space  $\mathbf{s} = (x, y)^T$ , a point  $\mathbf{s}_0 = (x_0, y_0)^T$  is an  
12 evolutionary branching point, if  $\mathbf{s}_0$  satisfies the following three conditions in  
13 the corresponding geodesic coordinates  $\tilde{\mathbf{s}} = (\tilde{x}, \tilde{y})^T$  given by Eqs. (16) with  
14 Eqs. (12c) (after rotation of coordinates  $\mathbf{s}$  so that Eq. (15) holds).

15 (i)  $\mathbf{s}_0$  is evolutionarily singular, satisfying

$$\tilde{\mathbf{g}} = \mathbf{g} = \mathbf{0}. \quad (19a)$$

17 (ii)  $\mathbf{s}_0$  is strongly convergence stable, i.e., the symmetric part of

$$\tilde{\mathbf{C}} = \mathbf{C} + \mathbf{\Omega} \quad (19b)$$

19 is negative definite.

1 (iii)  $\mathbf{s}_0$  is evolutionarily unstable, i.e., a symmetric matrix

$$2 \quad \tilde{\mathbf{D}} = \mathbf{D} + \boldsymbol{\Omega} \quad (19c)$$

3 has at least one positive eigenvalue.

4 Here  $\boldsymbol{\Omega} = -g_x \mathbf{Q}^x - g_y \mathbf{Q}^y$ , while  $\mathbf{g}$ ,  $\mathbf{C}$ , and  $\mathbf{D}$  are calculated from Eqs. (5).

5

6 Since Eq. (19a) gives  $\boldsymbol{\Omega} = -g_x \mathbf{Q}^x - g_y \mathbf{Q}^y = \mathbf{0}$ , we see  $\tilde{\mathbf{C}} = \mathbf{C}$  and  $\tilde{\mathbf{D}} = \mathbf{D}$ . This means  
7 that the branching point conditions in the geodesic coordinates  $\tilde{\mathbf{s}}$  are equivalent to  
8 those in the original coordinates  $\mathbf{s}$  (and in the original coordinates before the rotation).

9 Analogous results are obtained in distorted trait spaces of arbitrary higher dimensions  
10 (Appendix D.3). Therefore, distortion of a trait space of an arbitrary dimension does not  
11 affect the branching point conditions, as long as mutation is possible in all directions.

### 12 3.4 Conditions for evolutionary branching lines

13 Analogously to the case of the simply distorted trait space in Section 2.5, when the  
14 sensitivity of the geodesic invasion fitness,  $\tilde{f}(\tilde{\mathbf{s}}', \tilde{\mathbf{s}})$ , to single mutational changes of  $\tilde{\mathbf{s}}'$   
15 and  $\tilde{\mathbf{s}}$  is significantly lower in  $\tilde{y}$  than in  $\tilde{x}$ , so that Eq. (9a) holds, we can simplify Eqs.  
16 (18) into

$$17 \quad \tilde{f}(\tilde{\mathbf{s}}', \tilde{\mathbf{s}}) = \tilde{g}_x \delta \tilde{x} + \tilde{g}_y \delta \tilde{y} + \tilde{C}_{xx} [\tilde{x} - x_0] \delta \tilde{x} + \frac{1}{2} \tilde{D}_{xx} \delta \tilde{x}^2 + O(\sigma_x^3), \quad (20a)$$

18 with

$$19 \quad \begin{aligned} \tilde{g}_x &= g_x, \\ \tilde{C}_{xx} &= C_{xx} + \Omega_{xx}, \\ \tilde{D}_{xx} &= D_{xx} + \Omega_{xx}, \end{aligned} \quad (20b)$$

20 and

$$21 \quad \Omega_{xx} = -g_x Q_{xx}^x - g_y Q_{xx}^y. \quad (20c)$$

22 Note that Eqs. (20) are identical to Eqs. (8) except that Eq. (20c) is different from

1 Eq. (8c). On this basis, the simplified branching line conditions for arbitrarily distorted  
 2 two-dimensional trait spaces are described as follows (Appendix C.1-3).

3 **Branching line conditions in arbitrarily distorted two-dimensional trait spaces**  
 4 **(simplified):**

5 In an arbitrarily distorted two-dimensional trait space  $\mathbf{s} = (x, y)^T$ , there exists  
 6 an evolutionary branching line containing a point  $\mathbf{s}_0 = (x_0, y_0)^T$ , if  $\mathbf{s}_0$   
 7 satisfies the following four conditions in the corresponding geodesic  
 8 coordinates  $\tilde{\mathbf{s}} = (\tilde{x}, \tilde{y})^T$  given by Eqs. (16) with Eqs. (12c) (after rotation of  
 9 coordinates  $\mathbf{s}$  so that Eq. (15) holds).

10 (i) At  $\mathbf{s}_0$  the sensitivity of the geodesic invasion fitness,  $\tilde{f}(\tilde{\mathbf{s}}', \tilde{\mathbf{s}})$ , to single  
 11 mutational changes of  $\tilde{\mathbf{s}}'$  and  $\tilde{\mathbf{s}}$  is significantly lower in  $\tilde{y}$  than in  $\tilde{x}$ ,  
 12 satisfying

$$13 \frac{\frac{\sigma_y}{\sigma_x} [|\tilde{g}_y| + |\tilde{C}_{xy}| + |\tilde{C}_{xy}| + |\tilde{D}_{xy}|] + \frac{\sigma_y^2}{\sigma_x^2} [|\tilde{C}_{yy}| + |\tilde{D}_{yy}|]}{|\tilde{g}_x| + |\tilde{C}_{xx}| + |\tilde{D}_{xx}|} = 0(\sigma_x). \quad (21a)$$

14 (ii)  $\mathbf{s}_0$  is evolutionarily singular along  $\tilde{x}$ , satisfying

$$15 \tilde{g}_x = g_x = 0. \quad (21b)$$

16 (iii)  $\mathbf{s}_0$  is convergence stable along  $\tilde{x}$ , satisfying

$$17 \tilde{C}_{xx} = C_{xx} + \Omega_{xx} < 0. \quad (21c)$$

18 (iv)  $\mathbf{s}_0$  is sufficiently evolutionarily unstable (i.e., subject to sufficiently strong  
 19 disruptive selection) along  $\tilde{x}$ , satisfying

$$20 \frac{\sigma_x^2 \tilde{D}_{xx}}{\sigma_y |\tilde{g}_y|} = \frac{\sigma_x^2 [D_{xx} + \Omega_{xx}]}{\sigma_y |g_y|} > \sqrt{2}. \quad (21d)$$

21 Here  $\Omega_{xx} = -g_x Q_{xx}^x - g_y Q_{xx}^y$ , while  $g_x$ ,  $g_y$ ,  $C_{xx}$ , and  $D_{xx}$  are calculated from  
 22 Eqs. (5).

23

1 Note that condition (ii)  $g_x = 0$  gives  $g_x Q_{xx}^x = 0$ , while  $g_y Q_{xx}^y$  can remain  
2 nonzero in Eqs. (21c) and (21d). Thus, the distortion affects the branching line  
3 conditions through  $g_y Q_{xx}^y$ , as long as the fitness gradient along the  $y$ -axis,  $g_y$ , exists.  
4 Interestingly,  $g_x Q_{xx}^x = 0$  makes the above branching line conditions equivalent to the  
5 branching line conditions for the simply distorted trait space (Section 2.5), where  
6  $Q_{xx}^y = -\rho$ . Among the six  $Q$ s for describing local distortion, only  $Q_{xx}^y$  has effect on the  
7 branching line conditions, even in this general case.

8 When  $\sigma_y = 0$ , the evolutionary trajectory starting from  $\mathbf{s}_0 = (x_0, y_0)^T$  in  
9 coordinates  $\tilde{\mathbf{s}} = (\tilde{x}, \tilde{y})^T$  is completely restricted to the line  $\tilde{y} = y_0$ , which forms a  
10 parabolic curve in the coordinates  $\mathbf{s} = (x, y)^T$  in the neighborhood of  $\mathbf{s}_0$ ,

$$11 \quad y = -\frac{Q_{xx}^y}{2} [x - x_0]^2 + y_0 + \text{h. o. t.}, \quad (23)$$

12 analogously to Eq. (10) in Section 2.5. In this case, condition (i) always holds, and  
13 conditions (ii-iv) become identical to the three conditions for evolutionary branching  
14 point along a constraint curve that is locally approximated in the form of Eq. (23),  
15 derived by Ito and Sasaki (2016) with an extended Lagrange multiplier method.

16 The branching line conditions for distorted two-dimensional trait spaces, Eqs. (21),  
17 are extended for trait spaces of arbitrary higher dimensions (Ito and Dieckmann, 2014),  
18 referred to as “candidate-branching-surface conditions” in this paper, and which are  
19 affected by the distortion in a manner analogous to the two-dimensional case here  
20 (Appendix D.4). Those conditions extend the branching point conditions along  
21 constraint curves and surfaces of arbitrary dimensions (Ito and Sasaki, 2016), for the  
22 case allowing slight mutational deviations from those curves and surfaces.

### 23 **3.5 Conditions for evolutionary branching areas**

24 In numerical simulations, evolutionary branching may occur before populations have

1 reached to evolutionary branching points or lines. Consequently, the set of points where  
2 evolutionary branchings have occurred form an area or areas. To characterize such  
3 areas, Ito and Dieckmann (2012) have heuristically extended the branching line  
4 conditions into the branching area conditions, for non-distorted trait spaces. Although  
5 the branching area conditions have not been formally proved, those conditions have a  
6 good prediction performance in numerically simulated evolutionary dynamics (Ito and  
7 Dieckmann, 2012).

8 In this paper, we extend the branching area conditions for distorted trait spaces of  
9 two dimensions (Appendix C.5) and of arbitrary higher dimensions (Appendix D.5), by  
10 describing those conditions (for non-distorted trait spaces) in the corresponding  
11 geodesic coordinates. Analogously to the case of branching line conditions, the  
12 distortion affects the branching area conditions in trait spaces of arbitrary dimensions.

13 In non-distorted trait spaces, any evolutionary branching point or line is contained  
14 in an evolutionary branching area (Ito and Dieckmann, 2012). This property is kept in  
15 distorted trait spaces (Appendices C.5 and D.5).

16

## 17 4 Example

18 In this example, we design the trait space  $\mathbf{s} = (x, y)^T$  by nonlinear transformation of a  
19 coordinate system having a constant Gaussian mutation distribution. This setting shows  
20 clearly how our local coordinate normalization works.

### 21 4.1 Ecological interaction

22 In trait space  $\mathbf{s} = (x, y)^T$ , we consider the two-dimensional version of the classical  
23 MacArthur-Levins resource competition model (MacArthur and Levins, 1967; Vukics et  
24 al., 2003). The growth rate of  $i$ th phenotype  $\mathbf{s}_i = (x_i, y_i)^T$  among coexisting



1 phenotypes  $\mathbf{s}_1, \dots, \mathbf{s}_M$  is defined by

$$\frac{1}{n_i} \frac{dn_i}{dt} = 1 - \sum_{j=1}^M \frac{\alpha(\mathbf{s}_j - \mathbf{s}_i) n_j}{K(\mathbf{s}_i)}, \quad (24a)$$

2

$$\alpha(\mathbf{s}_j - \mathbf{s}_i) = \exp\left(-\frac{|\mathbf{s}_j - \mathbf{s}_i|^2}{2\sigma_\alpha^2}\right), \quad (24b)$$

$$K(\mathbf{s}) = K_0 \exp\left(-\frac{(\mathbf{s} - \mathbf{s}_K)^2}{2\sigma_K^2}\right). \quad (24c)$$

3 Here,  $K(\mathbf{s}_i)$  is the carrying capacity for phenotype  $\mathbf{s}_i$ , expressed with an isotropic  
 4 bivariate Gaussian function with its standard deviation  $\sigma_K$  and maximum  $K_0$  at  
 5  $\mathbf{s}_K = (x_K, y_K)^T$ . The competition kernel  $\alpha(\mathbf{s}_j - \mathbf{s}_i)$  describes the competition strength  
 6 between  $\mathbf{s}_j$  and  $\mathbf{s}_i$ , which is also an isotropic Gaussian function with its standard  
 7 deviation  $\sigma_\alpha$ , i.e., the competition strength is a decreasing function about their  
 8 phenotypic distance.

9 We assume a monomorphic population with its resident phenotype  $\mathbf{s}$ , where its  
 10 density  $n$  is at an equilibrium given by  $K(\mathbf{s})$ . The invasion fitness  $f(\mathbf{s}', \mathbf{s})$  is defined  
 11 as the per-capita growth rate of the mutant population density  $n'$  when it is very low,

12

$$f(\mathbf{s}', \mathbf{s}) = \lim_{n' \rightarrow 0} \left[ \frac{1}{n'} \frac{dn'}{dt} \right]_{n=K(\mathbf{s})} = 1 - \frac{\alpha(\mathbf{s}' - \mathbf{s})K(\mathbf{s})}{K(\mathbf{s}')}. \quad (25)$$

## 13 4.2 Mutation

14 To model a nontrivial but analytically tractable mutational covariance for the trait space  
 15  $\mathbf{s} = (x, y)^T$ , we assume that  $x$  and  $y$  are functions of  $r$  and  $\theta$  which mutate  
 16 independently, following one-dimensional Gaussian distributions with constant  
 17 standard deviations  $\sigma_\theta$  and  $\sigma_r$ , respectively. Thus, in coordinates  $(\theta, r)^T$ , the  
 18 mutation distribution is a bivariate Gaussian distribution with a constant and diagonal  
 19 mutational covariance with its entries  $\sigma_\theta^2$  and  $\sigma_r^2$  (Fig. 7b). Specifically, we define  $x$

1 and  $y$  as

$$\begin{aligned} x &= r \sin \theta, \\ y &= r \cos \theta. \end{aligned} \quad (26)$$

3 Eqs. (26) may be plausible when the trait space  $\mathbf{s} = (x, y)^T$  is for predators competing  
4 for their prey animals as resources (Fig. 8), where  $x$  and  $y$  respectively describe the  
5 width and height of the main prey for a predator of phenotype  $\mathbf{s} = (x, y)^T$ , while  $r$  and  
6  $\theta$  respectively describe the length of predator's jaw (or raptorial legs) and its maximum  
7 open angle. Note that both of  $x$  and  $y$  must be positive in this case.

8 From Eqs. (26), we can derive the mutational covariance as

$$\begin{aligned} \mathbf{V}(\mathbf{s}) &= \mathbf{P}(\theta) \begin{pmatrix} r^2 \sigma_\theta^2 & 0 \\ 0 & \sigma_r^2 \end{pmatrix} \mathbf{P}(\theta)^T, \\ \mathbf{P}(\theta) &= \begin{pmatrix} \cos \theta & \sin \theta \\ -\sin \theta & \cos \theta \end{pmatrix} \end{aligned} \quad (27)$$

10 (Eq. (F.7) in Appendix F.1). After coordinate rotation about a focal point  $\mathbf{s}_0 =$   
11  $(x_0, y_0)^T = (r_0 \sin \theta_0, r_0 \cos \theta_0)^T$  so that  $\mathbf{V}(\mathbf{s}_0)$  becomes diagonal, we obtain the  
12 geodesic coordinates  $\tilde{\mathbf{s}}$  (Fig. 7d) with

$$\begin{aligned} \mathbf{V}(\mathbf{s}_0) &= \begin{pmatrix} \sigma_x^2 & 0 \\ 0 & \sigma_y^2 \end{pmatrix} = \begin{pmatrix} r_0^2 \sigma_\theta^2 & 0 \\ 0 & \sigma_r^2 \end{pmatrix}, \\ \mathbf{Q}^x &= \begin{pmatrix} Q_{xx}^x & Q_{xy}^x \\ Q_{xy}^x & Q_{yy}^x \end{pmatrix} = \begin{pmatrix} 0 & r_0^{-1} \\ r_0^{-1} & 0 \end{pmatrix}, \\ \mathbf{Q}^y &= \begin{pmatrix} Q_{xx}^y & Q_{xy}^y \\ Q_{xy}^y & Q_{yy}^y \end{pmatrix} = \begin{pmatrix} r_0^{-1} & 0 \\ 0 & 0 \end{pmatrix} \end{aligned} \quad (28)$$

14 (Appendix F.2). Note that the constant Gaussian mutation distribution in coordinates  
15  $(\theta, r)^T$  (Fig. 7b) is locally recovered around the focal point  $\mathbf{s}_0$  in the geodesic  
16 coordinates  $\tilde{\mathbf{s}}$  (Fig. 7d). In this special example, the non-distorted coordinates  $(\theta, r)^T$   
17 allows application of the evolutionary branching conditions for non-distorted trait

1 spaces. (As shown in Appendix F.6, the branching point conditions and branching line  
 2 conditions derived in the non-distorted coordinates  $(r, \theta)^T$  are identical to those in the  
 3 geodesic coordinates  $\tilde{\mathbf{s}}$ .) However, obtaining such coordinates is usually impossible for  
 4 a given mutational covariance  $\mathbf{V}(\mathbf{s})$ . On the other hand, obtaining the geodesic  
 5 coordinates  $\tilde{\mathbf{s}}$  by the local coordinate normalization is possible in many cases.

### 6 **4.3 Branching point conditions**

7 From Eq. (25), we derive the fitness gradient, fitness-gradient variability, and fitness  
 8 curvature at the focal point  $\mathbf{s}_0$  in the original coordinates (after rotation, Fig. 7c), as

$$\begin{aligned}
 \mathbf{g} &= -\frac{1}{\sigma_K^2 r_0} \begin{pmatrix} y_K x_0 - x_K y_0 \\ r_0^2 - x_K x_0 - y_K y_0 \end{pmatrix}, \\
 \mathbf{C} &= -\frac{1}{\sigma_K^2} \begin{pmatrix} 1 & 0 \\ 0 & 1 \end{pmatrix}, \\
 \mathbf{D} &= \left[ \frac{1}{\sigma_\alpha^2} - \frac{1}{\sigma_K^2} \right] \begin{pmatrix} 1 & 0 \\ 0 & 1 \end{pmatrix} - \mathbf{g}^T \mathbf{g} \quad (29)
 \end{aligned}$$

10 (Appendix F.3). As shown in Section 3.3, the branching point conditions (Eqs. 19) are  
 11 not affected by the distortion. Thus, we can directly examine those conditions in the  
 12 original coordinates  $\mathbf{s}$ . Consequently, a necessary and sufficient condition for the  
 13 existence of an evolutionary branching point is given by  $\sigma_\alpha < \sigma_K$ . When  $\sigma_\alpha < \sigma_K$ , an  
 14 evolutionary branching point exists at the peak point of the carrying capacity,  $\mathbf{s}_K$   
 15 (Appendix F.4), as already derived in Vukics et al. (2003) for non-distorted trait spaces.  
 16 Conversely, when  $\sigma_\alpha > \sigma_K$ , the point  $\mathbf{s}_K$  is locally evolutionarily stable as well as  
 17 strongly convergence stable, in which case  $\mathbf{s}_K$  is not an evolutionary branching point.

### 18 **4.4 Branching line conditions**

19 The branching line conditions (Eqs. (21)) are examined in this model by substituting  
 20 Eqs. (28) and (29) into Eqs. (21). As shown in Appendix F.5, for a  $\sigma_r$  sufficiently

1 smaller than  $\sigma_\theta$ , there exists an evolutionary branching line along the line passing  
 2 through the origin and the peak point  $\mathbf{s}_K = (x_K, y_K)^T$  of the carrying capacity,  
 3 expressed in the original coordinates before the rotation, as

$$4 \quad \begin{pmatrix} x_0 \\ y_0 \end{pmatrix} = \begin{pmatrix} x_K \frac{r_0}{r_K} \\ y_K \frac{r_0}{r_K} \end{pmatrix}, \quad (30a)$$

5 with  $r_K = \sqrt{x_K^2 + y_K^2}$  and a positive parameter  $r_0$ , where the range of  $r_0$  is given by

$$6 \quad \frac{\sigma_\theta^2 r_0^2 \left[ \frac{\sigma_K^2}{\sigma_\alpha^2} - 1 + \sigma_K^2 \Omega_{xx} \right]}{\sigma_r |r_0 - r_K|} > \sqrt{2} \quad (30b)$$

7 with

$$8 \quad \Omega_{xx} = \frac{1}{\sigma_K^2} \left[ 1 - \frac{r_K}{r_0} \right]. \quad (30c)$$

9 Note that this branching line exists even under  $\sigma_\alpha > \sigma_K$ , in which case there exists no  
 10 branching point. Moreover, the distortion effect  $\Omega_{xx}$  enables the existence of this  
 11 branching line, because Eq. (30b) is never satisfied for  $\Omega_{xx} = 0$  under  $\sigma_\alpha > \sigma_K$ .

## 12 4.5 Numerical analysis

13 Figure 9 shows evolutionary dynamics simulated numerically as trait substitution  
 14 sequences (Ito and Dieckmann, 2014) starting from various initial phenotypes, under  
 15  $\sigma_r = \sigma_\theta$  (see Appendix G for the simulation algorithm). This simulation assumes  $\sigma_\alpha >$   
 16  $\sigma_K$ , i.e., the unique evolutionary singular point  $\mathbf{s}_K$  is convergence stable but not an  
 17 evolutionary branching point. As predicted, all evolutionary trajectories converge to  $\mathbf{s}_K$ ,  
 18 but evolutionary branching does not occur. Even in this case, a branching line can exist  
 19 when  $\sigma_r$  is much smaller than  $\sigma_\theta$  (Fig. 10a), inducing evolutionary branching (Fig.  
 20 10c-e). The area of occurrence of evolutionary branchings is well characterized by the  
 21 branching area (Fig. 10b).

1           Therefore, both of analytical and numerical results in this example accord with the  
2 general result derived in Section 3 that distortion of a trait space affects evolutionary  
3 branching when mutability have significant magnitude differences among directions,  
4 through the branching line conditions and branching area conditions.

5

## 6 **5 Discussion**

### 7 **5.1 General discussion**

8 Biological communities are thought to have been evolving in trait spaces that are not  
9 only multi-dimensional but also distorted, in a sense that mutational covariance  
10 matrices depend on the parental phenotypes of mutants. For efficient analysis of  
11 adaptive evolutionary diversification in distorted trait spaces, we made an assumption  
12 for mutation such that an appropriate local nonlinear coordinate transformation allows  
13 approximation of the mutation distribution with a locally constant Gaussian  
14 distribution, and then we applied conventional conditions for evolutionary branching  
15 points (Metz et al., 1996; Geritz et al., 1997), lines (Ito and Dieckmann, 2014) and areas  
16 (Ito and Dieckmann, 2012). Consequently, we have shown that the distortion does not  
17 affect branching point conditions but do affect branching line conditions and area  
18 conditions, in two-dimensional trait spaces. Analogous results have been obtained in  
19 trait spaces of arbitrary higher dimensions (Appendix D). Our method provides an  
20 extension tool of adaptive dynamics theory for distorted trait spaces. Our assumption  
21 for mutation and coordinate normalization described in Subsection 3.1 may be useful  
22 in other theories for evolution as well, including quantitative genetics.

## 1 **5.2 Assumption for mutation and evolutionary constraints**

2 Although the plausibility of our assumption for the geodesic-constant-mutation in  
3 Section 3.1 must be examined by empirical data, our assumption provides one of the  
4 simplest frameworks that allow analytical treatment of evolutionary branching in  
5 distorted trait spaces. The biological plausibility of our assumption may be examined  
6 by using it as a statistical fitting function for empirical data about mutation distributions,  
7 and checking its fitting performance. At least, our assumption would be closer to the  
8 reality than assuming a constant mutation distribution over a trait space.

9 An advantage of our assumption is that evolutionary dynamics along constraint  
10 curves or surfaces (of arbitrary dimensions) can be described by setting zeros for some  
11 eigenvalues of the mutational covariance matrix. The obtained evolutionary branching  
12 conditions are identical to those derived by Ito and Sasaki (2016) with an extended  
13 Lagrange multiplier method. (The obtained conditions are also mathematically  
14 equivalent to deMazancourt and Dieckmann (2004) when constraints are one-  
15 dimensional curves in two-dimensional trait spaces, and to Kisdi (2015) when  
16 constraints are one-dimensional curves in trait spaces of arbitrary dimensions.) Note  
17 that in reality all constraint curves are incomplete in a sense that mutational deviations  
18 from the curves must not be impossible, although their magnitudes may be very small  
19 and/or their likelihoods may be very low. Therefore, constraint curves themselves can  
20 change evolutionarily. Under our assumption for mutation in this paper, such a situation  
21 is easily expressed by assuming very small but nonzero values for some eigenvalues of  
22 the mutational covariance matrix, which gives evolutionary branching conditions along  
23 incomplete constraints, in the form of the branching line conditions for two-  
24 dimensional trait spaces (Sections 3.4) and the candidate-branching-surface conditions

1 for arbitrary higher-dimensional trait spaces (Appendix D.4).

## 2 **5.3 Relationship between evolutionary branching points and lines**

3 If a focal point  $\mathbf{s}_0$  is an evolutionary branching point with positive  $\tilde{D}_{xx}$  (Section 3.3),  
4 the point also satisfies the branching line conditions for sufficiently small  $\sigma_y$  (Section  
5 3.4), which allows the coexistence of the branching point and a branching line  
6 containing the point, like as Fig.2 in Ito and Dieckmann (2012) for a non-distorted two-  
7 dimensional trait space. On the other hand, if the focal point is an evolutionary  
8 branching point with negative  $\tilde{D}_{xx}$ , the branching line conditions are not satisfied by  
9 any small  $\sigma_y$ . In this case,  $\sigma_y \rightarrow 0$  makes the branching point just vanish. On the other  
10 hand, depending on the invasion fitness function, a sufficiently small  $\sigma_y$  allows  
11 existence of a branching line containing no branching point, as shown in Fig. 10, like as  
12 Figs. 4 in Ito and Dieckmann (2012) for non-distorted two-dimensional trait spaces.  
13 Thus, the relationship between branching points and branching lines is complex,  
14 requiring further analyses.

## 15 **5.4 Comparison with population genetic theory for distorted trait spaces**

16 Rice (2002) developed a general population genetic theory for the evolution of  
17 developmental interactions, in the framework of quantitative genetics. This theory can  
18 analyze evolutionary dynamics in distorted trait spaces from the perspective of  
19 developmental interactions, while its focal time span is different from our method. The  
20 theory by Rice (2002) seems good for analyzing short-term evolution with explicit  
21 description of the dynamics of standing genetic variations, while our method is good for  
22 analyzing long-term directional evolution and evolutionary diversification with  
23 simplification of the genetic structure.

24

1

## 2 Reference

- 3 Abrams PA (2003) Can adaptive evolution or behaviour lead to diversification of traits  
4 determining a trade-off between foraging gain and predation risk? *Evolutionary*  
5 *Ecology Research* 5: 653-670
- 6 Bonsall MB, Jansen VAA, Hassell MP (2004) Life history trade-offs assemble ecological  
7 guilds. *Science* 306: 111-114
- 8 Branco P, Stomp M, Egas M, Huisman J (2010) Evolution of nutrient uptake reveals a  
9 trade-off in the ecological stoichiometry of plant-herbivore interactions. *American*  
10 *Naturalist* 176: E162–E176
- 11 deMazancourt C, Dieckmann U (2004) Trade-off geometries and frequency-dependent  
12 selection. *American Naturalist* 164: 765–778
- 13 Dieckmann U, Doebeli M (1999) On the origin of species by sympatric speciation.  
14 *Nature* 400: 354–357
- 15 Dieckmann U, Law R (1996) The dynamical theory of coevolution: A derivation from  
16 stochastic ecological processes. *Journal of Mathematical Biology* 34: 579–612
- 17 Dieckmann U, Metz JA, Doebeli M, Tautz D (eds) (2004) *Adaptive speciation*. Cambridge  
18 University Press, Cambridge
- 19 Doebeli M (2011) *Adaptive Diversification*. *Monographs in Population Biology*,  
20 Princeton University Press, Princeton.
- 21 Doebeli M, Dieckmann U (2003) Speciation along environmental gradients. *Nature* 421:  
22 259–264
- 23 Doebeli M, Ispolatov I (2010) Complexity and Diversity. *Science* 328, 494-497
- 24 Doebeli M, Ispolatov I (2017) Diversity and Coevolutionary Dynamics in High-



- 1        Dimensional Phenotype Spaces. *American Naturalist* 189, 105-120
- 2        Egas M, Dieckmann U, Sabelis MW (2004) Evolution restricts the coexistence of  
3        specialists and generalists: The role of trade-off structure. *American Naturalist* 163:  
4        518-531
- 5        Geritz SAH, Kisdi E, Meszena G, Metz JAJ (1998) Evolutionarily singular strategies and  
6        the adaptive growth and branching of the evolutionary tree. *Evolutionary Ecology* 12:  
7        35-57
- 8        Geritz SAH, Metz JAJ, Kisdi E, Meszena G (1997) Dynamics of adaptation and  
9        evolutionary branching. *Physical Review Letters* 78: 2024-2027
- 10       Geritz SAH, Metz JAJ, Rueffler C (2016) Mutual invadability near evolutionarily singular  
11       strategies for multivariate traits, with special reference to the strongly convergence  
12       stable case. *Journal of Mathematical Biology* 72: 1081-1099
- 13       Hobson MP, Efstathiou GP, Lasenby AN (2006) *General Relativity: An Introduction for*  
14       *Physicists*. Cambridge University Press, Cambridge
- 15       Ito HC, Dieckmann U (2007) A new mechanism for recurrent adaptive radiations. *The*  
16       *American Naturalist* 170: E96-E111
- 17       Ito HC, Dieckmann U (2012) Evolutionary-branching lines and areas in bivariate trait  
18       spaces. *Evolutionary Ecology Research* 14: 555-582
- 19       Ito HC, Dieckmann U (2014) Evolutionary branching under slow directional evolution.  
20       *Journal of Theoretical Biology* 360: 290-314
- 21       Ito H, Sasaki A (2016) Evolutionary branching under multidimensional evolutionary  
22       constraints. *Journal of Theoretical Biology* 407: 409-428
- 23       Kamo M, Sasaki A, Boots M (2006) The role of trade-off shapes in the evolution of  
24       parasites in spatial host populations: an approximate analytical approach. *Journal of*

- 1 Theoretical Biology 244: 588-596
- 2 Kisdi É (2015) Construction of multiple trade-offs to obtain arbitrary singularities of  
3 adaptive dynamics. *Journal of Mathematical Biology* 70: 1093–1117
- 4 Lande R (1979) Quantitative genetic analysis of multivariate evolution applied to brain:  
5 body size allometry. *Evolution* 33: 402-416
- 6 Leimar O (2009) Multidimensional convergence stability. *Evolutionary Ecology*  
7 *Research* 11: 191–208
- 8 MacArthur RH, Levins R (1967) The limiting similarity, convergence and divergence of  
9 coexisting species. *American Naturalist* 101: 377-385
- 10 Maynard Smith J, Price GR (1973) The logic of animal conflict. *Nature* 246: 15-18
- 11 Metz JAJ, Geritz SAH, Mesznera G, Jacobs FJA, vanHeerwaarden JS (1996) Adaptive  
12 dynamics, a geometrical study of the consequences of nearly faithful reproduction.  
13 In: vanStrien SJ, Verduyn-Lunel SM(eds) *Stochastic and spatial structures of*  
14 *dynamical systems*. North Holland, Amsterdam, The Netherlands, pp 83–231
- 15 Rice SH (2002) A general population genetic theory for the evolution of developmental  
16 interactions. *PNAS* 99:15518-15523
- 17 Vukics A, Asboth J, Mesznera G (2003) Speciation in multidimensional evolutionary  
18 space. *Physical Review E* 68: 041903
- 19 Weigang HC, Kisdi É (2015) Evolution of dispersal under a fecundity-dispersal trade-  
20 off. *Journal of Theoretical Biology* 371: 145–153

21

## 22 Figure captions

### 23 **Figure 1**

24 Illustrated directional evolution affected by distortion of trait space. In panels (a) and

1 (b), the covariance matrices of mutation distributions, indicated with black dotted  
2 ellipses, vary depending on resident phenotypes (i.e., trait spaces are distorted). In both  
3 cases, directionally evolving populations described with Eqs. (1) are expected to change  
4 their directions (blue curved arrows) as well as speeds, even under constant selection  
5 gradients (dark gray arrows).

6

## 7 **Figure 2**

8 Gaussian approximation of mutation distributions before or after nonlinear coordinate  
9 transformation. Red closed curves are contours of mutation distributions defined by Eq.  
10 (14b), referred to as mutation contours. Green curves indicate constraint curves formed  
11 under  $\sigma_y = 0$ . The coordinate transformation is defined by Eqs. (2). Parameters:  $\sigma_x =$   
12  $0.8$ ,  $\sigma_y = 0.1$ , and  $\rho = 0.6$ .

13

## 14 **Figure 3**

15 Illustrated application of branching line conditions derived for simply distorted trait  
16 spaces in Section 2.5. In eco-evolutionary models defined on two-dimensional trait  
17 spaces with constraint curves, we can analyze the likelihood of evolutionary branching  
18 not only when all mutants are completely restricted to the curves (complete  
19 constraints), but also when some mutants can slightly deviate from the curves  
20 (incomplete constraints). The branching line conditions can be applied in the geodesic  
21 coordinates, obtained after coordinate rotation (from (a) to (b)) and nonlinear  
22 coordinate transformation (from (b) to (c)). Red closed curves are mutation contours  
23 defined by Eq. (14b). Green curves indicate constraint curves formed under  $\sigma_y = 0$ .  
24 The thick orange line is an evolutionary branching line detected by the branching line

1 conditions.

2

### 3 **Figure 4**

4 Local coordinate normalization for arbitrarily distorted trait spaces. Black ellipses are  
5 mutation ellipses, defined by Eq. (14a). A mutation ellipse indicates the mutational  
6 standard deviation in each direction from a parental phenotype located at its center.

7

### 8 **Figure 5**

9 Modes of local distortion. Each of (i-vi) in panel (a) shows how each  $Q_{\beta\gamma}^{\alpha}$  for  $\alpha, \beta, \gamma =$   
10  $x, y$  contributes to local distortion of a trait space (only the focal  $Q_{\beta\gamma}^{\alpha}$  is set at 0.4, while  
11 the others are all zero). An example for all  $Q_{\beta\gamma}^{\alpha}$ s being nonzero is shown in (vii) in panel  
12 (a). All of the local distortions (i-vii) are canceled by coordinate transformation into the  
13 geodesic coordinates (Eqs. (11a)) as shown in panel (b).

14

### 15 **Figure 6**

16 Deviation of mutation contour from mutation ellipse caused by nonlinear coordinate  
17 transformation. Black ellipses and red closed-curves are respectively mutation ellipses  
18 (Eq. (14a)) and mutation contours (Eq. (14b)). The coordinate transformation is  
19 defined by Eqs. (11a). Parameters:  $\sigma_x = 0.8$ ,  $\sigma_y = 0.1$ , and  $Q_{\beta\gamma}^{\alpha} = 0$  for all  $\alpha, \beta, \gamma = x, y$   
20 except  $Q_{xx}^y = -0.6$ .

21

### 22 **Figure 7**

23 Local coordinate normalization in Example. (a) Original coordinates  $\mathbf{s} = (x, y)^T$ . (b)

1 Non-distorted coordinates  $(\theta, R)^T$ , nonlinear transformation of which generates the  
2 original coordinates. (c) Original coordinates after rotation, still denoted by  $\mathbf{s} = (x, y)^T$ .  
3 (d) Geodesic coordinates  $\tilde{\mathbf{s}} = (\tilde{x}, \tilde{y})^T$ . Black dots indicate a focal point  $\mathbf{s}_0$  for  
4 examination of evolutionary branching conditions. Thick red and thin black ellipses  
5 respectively indicate mutation contours and mutation ellipses (almost identical in this  
6 figure). Green curves indicate constraint curves formed under  $\sigma_r = 0$ . Parameters:  
7  $\sigma_\theta = 0.2$ ,  $\sigma_r = 0.03$ .

8

## 9 **Figure 8**

10 Ecological assumption for predator-prey relationship in Example.

11

## 12 **Figure 9**

13 Numerically calculated evolutionary trajectories in Example, without significant  
14 anisotropy in mutation. From each of randomly chosen 25 initial phenotypes (small  
15 blue dots) within  $0 \leq \theta \leq \pi/2$  and  $0.1 \leq r \leq 1.5$ , evolutionary trajectories was  
16 calculated for  $10^9$  generations, as a trait substitution sequence assuming asexual  
17 reproduction (blue curves) (see Appendix G for the simulation algorithm). White  
18 triangles bordered with black indicate the final resident phenotypes that have not  
19 brought about evolutionary branching. Neither evolutionary branching line (Section  
20 3.4) nor area (Section 3.5) was found (condition (i) in the branching line condition is  
21 examined by replacing “ $= 0(\sigma_x)$ ” with “ $> \sqrt{\sigma_x}$ ” in the right hand side of Eq. (21a)).  
22 Parameters:  $x_K = 0.15$ ,  $y_K = \sqrt{3}x_K$ ,  $K_0 = 1 \times 10^6$ ,  $\sigma_K = 0.7$ ,  $\sigma_\alpha = 0.75$ ,  $\mu = 1 \times$   
23  $10^{-5}$  (mutation rate per birth event), and  $\sigma_\theta = \sigma_r = 5 \times 10^{-3}$ .

24

## 1 **Figure 10**

2 Comparison of evolutionary branching lines and areas with numerically calculated  
3 evolutionary trajectories in Example, with significant anisotropy in mutation. In panel  
4 (a), an evolutionary branching line (Section 3.4) is indicated with a red line. An  
5 evolutionary branching area (Section 3.5) is indicated with an orange area bordered by  
6 black curve (values of the color bar indicate the values for  $\beta$  in Eqs. (C.7) in Appendix  
7 C.5). The green curves indicate constraint curves formed under  $\sigma_r = 0$ . Panel (b) shows  
8 50 evolutionary trajectories numerically calculated as trait substitution sequences  
9 (blue curves) for  $10^9$  generations (Appendix G), with initial phenotypes (small blue  
10 dots) randomly chosen within  $0 \leq \theta \leq \pi/2$  and  $0.1 \leq r \leq 1.5$ . White circles  
11 bordered with red indicate occurrence of evolutionary branching there, while white  
12 triangles bordered with blue indicate the final resident phenotypes that have not  
13 brought about evolutionary branching. Panels (c-e) show an example evolutionary  
14 trajectory (blue curves). The initial state, first branching, and the state at the end of  
15 simulation are indicated with the blue filled circle, white circle bordered with red, white  
16 triangle bordered with black, respectively. The time unit in panels (d-e) is generation.  
17 Parameters:  $\sigma_\theta = 5 \times 10^{-3}$ ,  $\sigma_r = 1 \times 10^{-5}$ , and other parameters are the same as in  
18 Fig.9.

19

## 1 Appendix A: Mutation distributions in original coordinates

### 2 A.1. Simply distorted trait space

3 By using Eqs. (3) in the main text, the mutation distribution  $m(\mathbf{s}', \mathbf{s})$  can be expressed  
4 as

$$\begin{aligned} m(\mathbf{s}', \mathbf{s}) &= \tilde{m}(\tilde{\mathbf{s}}', \tilde{\mathbf{s}}) \left| \frac{d\tilde{\mathbf{s}}'}{d\mathbf{s}'} \right| \\ &= \frac{1}{2\pi\sigma_x\sigma_y} \exp\left(-\frac{[\tilde{x}' - \tilde{x}]^2}{2\sigma_x^2} - \frac{[\tilde{y}' - \tilde{y}]^2}{2\sigma_y^2}\right) \left| \frac{d\tilde{\mathbf{s}}'}{d\mathbf{s}'} \right|, \end{aligned} \quad (\text{A.1})$$

6 where the expansion or diminishing rate of area element due to the coordinate  
7 transformation is described by  $\left| \frac{d\tilde{\mathbf{s}}'}{d\mathbf{s}'} \right|$ , which is the determinant of a Jacobian matrix  $\frac{d\tilde{\mathbf{s}}'}{d\mathbf{s}'}$ .

8 By expressing Eqs. (2) with respect to mutant  $\mathbf{s}'$ ,

$$\begin{aligned} x' &= \tilde{x}', \\ y' &= \tilde{y}' + \frac{\rho}{2}[\tilde{x}' - x_0]^2, \end{aligned} \quad (\text{A.2})$$

10 we see

$$\frac{d\tilde{\mathbf{s}}'}{d\mathbf{s}'} = \begin{pmatrix} \frac{\partial \tilde{x}'}{\partial x'} & \frac{\partial \tilde{x}'}{\partial y'} \\ \frac{\partial \tilde{y}'}{\partial x'} & \frac{\partial \tilde{y}'}{\partial y'} \end{pmatrix} = \begin{pmatrix} \frac{\partial x'}{\partial \tilde{x}'} & \frac{\partial x'}{\partial \tilde{y}'} \\ \frac{\partial y'}{\partial \tilde{x}'} & \frac{\partial y'}{\partial \tilde{y}'} \end{pmatrix}^{-1} = \begin{pmatrix} 1 & 0 \\ \rho\tilde{x}' & 1 \end{pmatrix}^{-1} = \begin{pmatrix} 1 & 0 \\ -\rho x' & 1 \end{pmatrix}, \quad (\text{A.3})$$

12 and thus

$$\left| \frac{d\tilde{\mathbf{s}}'}{d\mathbf{s}'} \right| = 1. \quad (\text{A.4})$$

14 In addition, from Eqs. (2) we see

$$\begin{aligned} \tilde{x} &= x, \\ \tilde{y} &= y - \frac{\rho}{2}[x - x_0]^2. \end{aligned} \quad (\text{A.5})$$

16 Substituting Eqs. (A.4) and (A.5) into Eq. (A.1) gives

$$1 \quad m(\mathbf{s}', \mathbf{s}) = \frac{1}{2\pi\sigma_x\sigma_y} \exp\left(-\frac{[x' - x]^2}{2\sigma_x^2} - \frac{\left[y' - \frac{\rho}{2}[x' - x_0]^2 - y + \frac{\rho}{2}[x - x_0]^2\right]^2}{2\sigma_y^2}\right). \quad (\text{A.6})$$

2 To see the deviation of  $m(\mathbf{s}', \mathbf{s})$  from  $\tilde{m}(\tilde{\mathbf{s}}', \tilde{\mathbf{s}})$ , we express  $\delta x = x' - x$ ,  $\delta y =$   
 3  $y' - y$  as

$$4 \quad \begin{aligned} \delta x &= \delta \tilde{x}, \\ \delta y &= \delta \tilde{y} - \rho[\tilde{x} - x_0]\delta \tilde{x} - \frac{\rho}{2}\delta \tilde{x}^2. \end{aligned} \quad (\text{A.7})$$

5 with  $\delta \tilde{x} = \tilde{x}' - \tilde{x}$ , and  $\delta \tilde{y} = \tilde{y}' - \tilde{y}$ . Note that  $(\delta \tilde{x}, \delta \tilde{y})^T = \tilde{\mathbf{s}}' - \tilde{\mathbf{s}}$  follows  $\tilde{m}(\tilde{\mathbf{s}}', \tilde{\mathbf{s}})$ ,  
 6 which is a constant Gaussian distribution, Eqs. (3). If  $\sigma_y$  has a similar magnitude to  $\sigma_x$ ,  
 7 i.e., both of  $|\delta \tilde{x}|$  and  $|\delta \tilde{y}|$  are expected to be of order  $\sigma_x^1$ , then  $\delta x = \delta \tilde{x}$  and  $\delta y \simeq$   
 8  $\delta \tilde{y}$  hold for a resident in the neighborhood of the focal point satisfying  $|\tilde{x} - x_0| =$   
 9  $O(\sigma_x)$ . In this case, the deviation of  $m(\mathbf{s}', \mathbf{s})$  from  $\tilde{m}(\tilde{\mathbf{s}}', \tilde{\mathbf{s}})$  is negligible. On the other  
 10 hand, if  $\sigma_y$  is much smaller than  $\sigma_x$  so that  $\sigma_y = O(\sigma_x^2)$ , i.e.,  $|\delta \tilde{y}| = O(\sigma_y) = O(\sigma_x^2)$   
 11 is expected, then  $-\rho[\tilde{x} - x_0]\delta \tilde{x} - \frac{\rho}{2}\delta \tilde{x}^2$  is not negligible, and thus  $\delta y \simeq \delta \tilde{y}$  does not  
 12 hold. In this case, the deviation of  $m(\mathbf{s}', \mathbf{s})$  from  $\tilde{m}(\tilde{\mathbf{s}}', \tilde{\mathbf{s}})$  is not negligible, even under  
 13 an extremely small  $\sigma_x$ .

## 14 A.2. Arbitrarily distorted trait space

15 For an arbitrarily distorted two-dimensional trait space, from Eqs. (11) we express the  
 16 mutation distribution  $m(\mathbf{s}', \mathbf{s})$  as

$$17 \quad \begin{aligned} m(\mathbf{s}', \mathbf{s}) &= \tilde{m}(\tilde{\mathbf{s}}', \mathbf{s}) \left| \frac{d\tilde{\mathbf{s}}'}{d\mathbf{s}'} \right| \\ &\simeq \frac{1}{2\pi\sqrt{|\mathbf{V}(\mathbf{s}_0)|}} \exp\left(\frac{1}{2}[\tilde{\mathbf{s}}' - \tilde{\mathbf{s}}]^T \mathbf{V}(\mathbf{s}_0)^{-1}[\tilde{\mathbf{s}}' - \tilde{\mathbf{s}}]\right) \left| \frac{d\tilde{\mathbf{s}}'}{d\mathbf{s}'} \right|, \end{aligned} \quad (\text{A.8})$$

18 where  $\frac{d\tilde{\mathbf{s}}'}{d\mathbf{s}'}$  is expressed by using Eq. (16) as



$$\frac{d\tilde{\mathbf{s}}'}{d\mathbf{s}'} = \begin{pmatrix} \frac{\partial \tilde{x}'}{\partial x'} & \frac{\partial \tilde{x}'}{\partial y'} \\ \frac{\partial \tilde{y}'}{\partial x'} & \frac{\partial \tilde{y}'}{\partial y'} \end{pmatrix} = \begin{pmatrix} \frac{\partial x'}{\partial \tilde{x}'} & \frac{\partial x'}{\partial \tilde{y}'} \\ \frac{\partial y'}{\partial \tilde{x}'} & \frac{\partial y'}{\partial \tilde{y}'} \end{pmatrix}^{-1} = \left[ \mathbf{I} - \begin{pmatrix} (\tilde{\mathbf{s}}' - \mathbf{s}_0)^T \mathbf{Q}^x \\ (\tilde{\mathbf{s}}' - \mathbf{s}_0)^T \mathbf{Q}^y \end{pmatrix} \right]^{-1}. \quad (\text{A.9})$$

From Eqs. (16), we can express  $\tilde{\mathbf{s}}'$  and  $\tilde{\mathbf{s}}$  as

$$\begin{aligned} \tilde{\mathbf{s}}' &= \mathbf{s}' + \frac{1}{2} \begin{pmatrix} (\mathbf{s}' - \mathbf{s}_0)^T \mathbf{Q}^x (\mathbf{s}' - \mathbf{s}_0) \\ (\mathbf{s}' - \mathbf{s}_0)^T \mathbf{Q}^y (\mathbf{s}' - \mathbf{s}_0) \end{pmatrix} + \text{h. o. t.}, \\ \tilde{\mathbf{s}} &= \mathbf{s} + \frac{1}{2} \begin{pmatrix} (\mathbf{s} - \mathbf{s}_0)^T \mathbf{Q}^x (\mathbf{s} - \mathbf{s}_0) \\ (\mathbf{s} - \mathbf{s}_0)^T \mathbf{Q}^y (\mathbf{s} - \mathbf{s}_0) \end{pmatrix} + \text{h. o. t.}, \end{aligned} \quad (\text{A.10})$$

from which we express  $\delta\tilde{\mathbf{s}} = \tilde{\mathbf{s}}' - \tilde{\mathbf{s}}$  as

$$\delta\tilde{\mathbf{s}} = \delta\mathbf{s} + \begin{pmatrix} (\mathbf{s} - \mathbf{s}_0)^T \mathbf{Q}^x \delta\mathbf{s} \\ (\mathbf{s} - \mathbf{s}_0)^T \mathbf{Q}^y \delta\mathbf{s} \end{pmatrix} + \frac{1}{2} \begin{pmatrix} \delta\mathbf{s}^T \mathbf{Q}^x \delta\mathbf{s} \\ \delta\mathbf{s}^T \mathbf{Q}^y \delta\mathbf{s} \end{pmatrix} + \text{h. o. t.} \quad (\text{A.11})$$

with  $\delta\mathbf{s} = \mathbf{s}' - \mathbf{s}$ . Substituting Eqs. (A.9) and (A.11) into Eq. (A.8) approximately gives an explicit form for  $m(\mathbf{s}', \mathbf{s})$ , which is used for plotting mutation contours in Fig. 7.

To see the deviation of  $m(\mathbf{s}', \mathbf{s})$  from  $\tilde{m}(\tilde{\mathbf{s}}', \tilde{\mathbf{s}})$ , we express  $\delta x = x' - x$ ,  $\delta y = y' - y$  as

$$\begin{aligned} \delta x &= \delta \tilde{x} + (\mathbf{s} - \mathbf{s}_0)^T \mathbf{Q}^x \delta\mathbf{s} + \frac{1}{2} \delta\mathbf{s}^T \mathbf{Q}^x \delta\mathbf{s}, \\ \delta y &= \delta \tilde{y} + (\mathbf{s} - \mathbf{s}_0)^T \mathbf{Q}^y \delta\mathbf{s} + \frac{1}{2} \delta\mathbf{s}^T \mathbf{Q}^y \delta\mathbf{s}, \end{aligned} \quad (\text{A.12})$$

with  $\delta \tilde{x} = \tilde{x}' - \tilde{x}$ , and  $\delta \tilde{y} = \tilde{y}' - \tilde{y}$ . Then analogously to Section A.1 above, if  $\sigma_y$  has a similar magnitude to  $\sigma_x$ , the deviation of  $m(\mathbf{s}', \mathbf{s})$  from  $\tilde{m}(\tilde{\mathbf{s}}', \tilde{\mathbf{s}})$  is negligible. On the other hand, if  $\sigma_y$  is much smaller than  $\sigma_x$  so that  $\sigma_y = O(\sigma_x^2)$ , the deviation of  $m(\mathbf{s}', \mathbf{s})$  from  $\tilde{m}(\tilde{\mathbf{s}}', \tilde{\mathbf{s}})$  is not negligible, even under an extremely small  $\sigma_x$ .

15

## Appendix B: Quadratic approximation of invasion fitness functions

Following Ito and Dieckmann (2014), we derive an approximate quadratic form of

1  $f(\mathbf{s}', \mathbf{s})$ , as follows. We assume  $\mathbf{s}_0 = \mathbf{0}$  without loss of generality. We expand  $f(\mathbf{s}', \mathbf{s})$   
 2 around  $\mathbf{s}_0 = \mathbf{0}$  with respect to  $\mathbf{s}'$  and  $\mathbf{s}$  as

$$3 \quad f(\mathbf{s}', \mathbf{s}) = \mathbf{g}_m^T \mathbf{s}' + \mathbf{g}_r^T \mathbf{s} + \frac{1}{2} [\mathbf{s}'^T \mathbf{D}_{mm} \mathbf{s}' + \mathbf{s}^T \mathbf{D}_{rr} \mathbf{s} + \mathbf{s}^T \mathbf{D}_{rm} \mathbf{s}' + \mathbf{s}'^T \mathbf{D}_{mr} \mathbf{s}] + \text{h. o. t.}, \quad (\text{B. 1a})$$

4 with

$$5 \quad \begin{aligned} \mathbf{g}_m &= (f_{x'} \quad f_{y'}), \mathbf{g}_r = (f_x \quad f_y), \\ \mathbf{D}_{mm} &= \begin{pmatrix} f_{x'x'} & f_{x'y'} \\ f_{x'y'} & f_{y'y'} \end{pmatrix}, \mathbf{D}_{rr} = \begin{pmatrix} f_{xx} & f_{xy} \\ f_{xy} & f_{yy} \end{pmatrix}, \\ \mathbf{D}_{mr} &= \begin{pmatrix} f_{x'x} & f_{x'y} \\ f_{y'x} & f_{y'y} \end{pmatrix}, \mathbf{D}_{rm} = \begin{pmatrix} f_{xx'} & f_{xy'} \\ f_{yx'} & f_{yy'} \end{pmatrix} = \mathbf{D}_{mr}^T, \end{aligned} \quad (\text{B. 1b})$$

6 where the subscripts 'm' and 'r' refer to mutants and residents, respectively, and where

7  $f_\alpha = \partial f(\mathbf{s}', \mathbf{s}) / \partial \alpha$  for  $\alpha = x', y', x, y$  and  $f_{\alpha\beta} = \partial^2 f(\mathbf{s}', \mathbf{s}) / \partial \alpha \partial \beta$  for  $\alpha, \beta =$

8  $x', y', x, y$  denote the first and second derivatives of  $f(\mathbf{s}', \mathbf{s})$ , respectively, evaluated at

9  $\mathbf{s}' = \mathbf{s} = \mathbf{s}_0$ . Since  $f(\mathbf{s}, \mathbf{s}) = 0$  always holds for any  $\mathbf{s}$  by definition, we see from Eq.

10 (B.1a) that

$$11 \quad f(\mathbf{s}, \mathbf{s}) = \mathbf{g}_m^T \mathbf{s} + \mathbf{g}_r^T \mathbf{s} + \frac{1}{2} [\mathbf{s}^T \mathbf{D}_{mm} \mathbf{s} + \mathbf{s}^T \mathbf{D}_{rr} \mathbf{s} + \mathbf{s}^T \mathbf{D}_{rm} \mathbf{s} + \mathbf{s}^T \mathbf{D}_{mr} \mathbf{s}] + \text{h. o. t.} = 0. \quad (\text{B. 2})$$

12 Subtracting Eq. (B.2) from Eq. (B.1a) gives

$$13 \quad \begin{aligned} f(\mathbf{s}', \mathbf{s}) &= \mathbf{g}_m^T \delta \mathbf{s} + \frac{1}{2} [\delta \mathbf{s} + \mathbf{s}]^T \mathbf{D}_{mm} [\delta \mathbf{s} + \mathbf{s}] - \frac{1}{2} \mathbf{s}^T \mathbf{D}_{mm} \mathbf{s} \\ &\quad + \frac{1}{2} \mathbf{s}^T \mathbf{D}_{rm} \delta \mathbf{s} + \frac{1}{2} \delta \mathbf{s}^T \mathbf{D}_{mr} \mathbf{s} + \text{h. o. t.} \\ &= \mathbf{g}_m^T \delta \mathbf{s} + \frac{1}{2} [\delta \mathbf{s}^T \mathbf{D}_{mm} \delta \mathbf{s} + \mathbf{s}^T \mathbf{D}_{mm} \delta \mathbf{s} + \delta \mathbf{s}^T \mathbf{D}_{mm} \mathbf{s}] \\ &\quad + \frac{1}{2} [\mathbf{s}^T \mathbf{D}_{rm} \delta \mathbf{s} + \delta \mathbf{s}^T \mathbf{D}_{mr} \mathbf{s}] + \text{h. o. t.} \end{aligned} \quad (\text{B. 3})$$

14 with  $\delta \mathbf{s} = \mathbf{s}' - \mathbf{s}$ . By using  $\delta \mathbf{s}^T \mathbf{D}_{mm} \mathbf{s} = [\delta \mathbf{s}^T \mathbf{D}_{mm} \mathbf{s}]^T = \mathbf{s}^T \mathbf{D}_{mm}^T \delta \mathbf{s} = \mathbf{s}^T \mathbf{D}_{mm} \delta \mathbf{s}$  and

15  $\delta \mathbf{s}^T \mathbf{D}_{mr} \mathbf{s} = [\delta \mathbf{s}^T \mathbf{D}_{mr} \mathbf{s}]^T = \mathbf{s}^T \mathbf{D}_{mr}^T \delta \mathbf{s} = \mathbf{s}^T \mathbf{D}_{rm} \delta \mathbf{s}$ , we further transform Eq. (B.3) into

$$f(\mathbf{s}', \mathbf{s}) = \mathbf{g}_m^T \delta \mathbf{s} + \frac{1}{2} \delta \mathbf{s}^T \mathbf{D}_{mm} \delta \mathbf{s} + \mathbf{s}^T \mathbf{D}_{mm} \delta \mathbf{s} + \mathbf{s}^T \mathbf{D}_{rm} \delta \mathbf{s} + \text{h. o. t.}$$

1

$$= \mathbf{g}_m^T \delta \mathbf{s} + \frac{1}{2} \delta \mathbf{s}^T \mathbf{D}_{mm} \delta \mathbf{s} + \mathbf{s}^T [\mathbf{D}_{mm} + \mathbf{D}_{rm}] \delta \mathbf{s} + \text{h. o. t.} \quad (\text{B. 4})$$

2 Analogously, for  $\mathbf{s}_0 \neq \mathbf{0}$ , we get

$$f(\mathbf{s}', \mathbf{s}) = \mathbf{g}_m^T \delta \mathbf{s} + \frac{1}{2} \delta \mathbf{s}^T \mathbf{D}_{mm} \delta \mathbf{s} + [\mathbf{s} - \mathbf{s}_0]^T [\mathbf{D}_{mm} + \mathbf{D}_{rm}] \delta \mathbf{s} + \text{h. o. t.}$$

3

$$= \mathbf{g}^T \delta \mathbf{s} + \frac{1}{2} \delta \mathbf{s}^T \mathbf{D} \delta \mathbf{s} + \mathbf{s}^T \mathbf{C} \delta \mathbf{s} + \text{h. o. t.} \quad (\text{B. 5})$$

4 with  $\mathbf{g} = \mathbf{g}_m$ ,  $\mathbf{D} = \mathbf{D}_{mm}$ , and  $\mathbf{C} = \mathbf{D}_{mm} + \mathbf{D}_{rm}$ .

5

## 6 Appendix C: Branching line conditions and area conditions in 7 arbitrarily distorted two-dimensional trait spaces

### 8 C.1. Preparation

9 To apply the original branching line conditions (Ito and Dieckmann, 2014) to a distorted  
10 trait space, we transform the geodesic coordinates  $\tilde{\mathbf{s}}$  for a focal point  $\mathbf{s}_0$ , given by Eqs.  
11 (12c), (15) and (16), into new coordinates  $\tilde{\mathbf{s}} = (\tilde{x}, \tilde{y})^T$ , so that the mutational  
12 covariance becomes  $\sigma_x \mathbf{I}$ , i.e., the mutation is isotropic with its standard deviation  $\sigma_x$ .

13 Specifically, we define coordinates  $\tilde{\mathbf{s}} = (\tilde{x}, \tilde{y})^T$  by

$$\tilde{\mathbf{s}} - \mathbf{s}_0 = \mathbf{WR}[\tilde{\mathbf{s}} - \mathbf{s}_0],$$

14

$$\mathbf{W} = \begin{pmatrix} 1 & 0 \\ 0 & \frac{\sigma_y}{\sigma_x} \end{pmatrix}, \quad (\text{C. 1})$$

15 where  $\mathbf{R}$  is a rotation matrix for further adjustment, which is used for description of  
16 the original branching line conditions and area conditions. Substituting Eqs. (C.1) into  
17 the geodesic invasion fitness, Eqs. (18) in the main text, gives the invasion fitness in  
18 coordinates  $\tilde{\mathbf{s}}$ ,

1 
$$\check{f}(\check{\mathbf{s}}', \check{\mathbf{s}}) = \check{\mathbf{g}}^T \delta \check{\mathbf{s}} + [\check{\mathbf{s}} - \mathbf{s}_0]^T \check{\mathbf{C}} \delta \check{\mathbf{s}} + \frac{1}{2} \delta \check{\mathbf{s}}^T \check{\mathbf{D}} \delta \check{\mathbf{s}} + \text{h. o. t.} \quad (\text{C. 2a})$$

2 with

3 
$$\begin{aligned} \check{\mathbf{g}} &= \begin{pmatrix} \check{g}_x \\ \check{g}_y \end{pmatrix} = \mathbf{R}^T \mathbf{W}^T \check{\mathbf{g}}, \\ \check{\mathbf{C}} &= \begin{pmatrix} \check{C}_{xx} & \check{C}_{xy} \\ \check{C}_{yx} & \check{C}_{yy} \end{pmatrix} = \mathbf{R}^T \mathbf{W}^T \check{\mathbf{C}} \mathbf{W} \mathbf{R}, \\ \check{\mathbf{D}} &= \begin{pmatrix} \check{D}_{xx} & \check{D}_{xy} \\ \check{D}_{xy} & \check{C}_{yy} \end{pmatrix} = \mathbf{R}^T \mathbf{W}^T \check{\mathbf{D}} \mathbf{W} \mathbf{R}. \end{aligned} \quad (\text{C. 2b})$$

4 According to Eqs. (11b) and (11c) in the geodesic-constant mutation assumption,  
5 the mutation distribution  $\check{m}(\check{\mathbf{s}}', \check{\mathbf{s}})$  in coordinates  $\check{\mathbf{s}}$  can be approximated with a  
6 constant isotropic Gaussian distribution with its standard deviation  $\sigma_x$ ,

7 
$$\check{m}(\check{\mathbf{s}}', \check{\mathbf{s}}) \simeq \frac{1}{2\pi\sigma_x^2} \exp\left(-\frac{|\check{\mathbf{s}}' - \check{\mathbf{s}}|^2}{2\sigma_x^2}\right) \quad (\text{C. 3a})$$

8 for a resident  $\check{\mathbf{s}} = (\check{x}, \check{y})^T$  satisfying

9 
$$|\check{x} - x_0| = O(\sigma_x), \quad |\check{y} - y_0| = O(\sigma_x). \quad (\text{C. 3b})$$

10 Thus, if the focal point  $\mathbf{s}_0$  satisfies the branching line conditions below (or the  
11 branching point conditions), we expect that evolutionary branching successfully  
12 proceed (from an initial resident  $\check{\mathbf{s}}$  satisfying  $|\check{x} - x_0| = O(\sigma_x)$  and  $|\check{y} - y_0| =$   
13  $O(\sigma_x)$ ), as long as distances of coexisting residents to the focal point  $\mathbf{s}_0$  are all  $O(\sigma_x)$ ,  
14 so that the mutation distributions for those residents still can be approximated with a  
15 constant and isotropic Gaussian distribution with its standard deviation  $\sigma_x$ , and that  
16 the quadratic approximation of the invasion fitness function is valid (Ito and Dieckmann,  
17 2014).

## 18 C.2. Original branching line conditions

19 In coordinates  $\check{\mathbf{s}}$  defined in Eqs. (C.1), we describe the original branching line

1 conditions (Ito and Dieckmann, 2014), as follows.

2 **Branching line conditions in arbitrarily distorted two-dimensional trait spaces**  
 3 **(original)**

4 In an arbitrarily distorted two-dimensional trait space  $\mathbf{s} = (x, y)^T$ , there exists  
 5 an evolutionary branching line containing a point  $\mathbf{s}_0 = (x_0, y_0)^T$ , if  $\mathbf{s}_0$   
 6 satisfies the following four conditions in the corresponding coordinates  $\check{\mathbf{s}} =$   
 7  $(\check{x}, \check{y})^T$  given by Eqs. (C.1), (12c), and (16) (after rotation of coordinates  $\mathbf{s}$   
 8 so that Eq. (15) holds), with an appropriate choice of  $\mathbf{R}$ .

9 (i) At  $\mathbf{s}_0$  the sensitivity of  $\check{f}(\check{\mathbf{s}}', \check{\mathbf{s}})$  to single mutational changes of  $\check{\mathbf{s}}'$  and  $\check{\mathbf{s}}$   
 10 are significantly lower in  $\check{y}$  than in  $\check{x}$ , satisfying

$$11 \frac{|\check{g}_y| + |\check{C}_{xy}| + |\check{C}_{yx}| + |\check{C}_{yy}| + |\check{D}_{xy}| + |\check{D}_{yy}|}{|\check{g}_x| + |\check{C}_{xx}| + |\check{D}_{xx}|} = O(\sigma_x). \quad (C.3a)$$

12 (ii)  $\mathbf{s}_0$  is evolutionarily singular along  $\check{x}$ , satisfying

$$13 \check{g}_x = 0. \quad (C.3b)$$

14 (iii)  $\mathbf{s}_0$  is convergence stable along  $\check{x}$ , satisfying

$$15 \check{C}_{xx} < 0. \quad (C.3c)$$

16 (iv)  $\mathbf{s}_0$  is sufficiently evolutionarily unstable (i.e., subject to sufficiently strong  
 17 disruptive selection) along  $\check{x}$ , satisfying

$$18 \frac{\sigma_x \check{D}_{xx}}{|\check{g}_y|} > \sqrt{2}. \quad (C.3d)$$

19

20 Note that condition (i) allows simplification of Eq. (C.2a) into

$$21 \check{f}(\check{\mathbf{s}}', \check{\mathbf{s}}) = \check{g}_x \delta \check{x} + \check{g}_y \delta \check{y} + \check{C}_{xx} [\check{x} - x_0] \delta \check{x} + \frac{1}{2} \check{D}_{xx} \delta \check{x}^2 + O(\sigma_x^3) \quad (C.4)$$

22 (Ito and Dieckmann, 2014).

### 1 C.3. Simplified branching line conditions

2 When  $\xi = \frac{\sigma_y}{\sigma_x}$  is very small so that  $\sigma_y = O(\sigma_x^2)$ , an appropriate  $\mathbf{R}$  for the original  
3 branching line conditions is approximately given by  $\mathbf{I}$  (Ito and Dieckmann, 2014).

4 Assuming  $\mathbf{R} = \mathbf{I}$  transforms Eqs. (C.2b) into

$$5 \quad \tilde{\mathbf{g}} = \begin{pmatrix} \tilde{g}_x \\ \xi \tilde{g}_y \end{pmatrix}, \tilde{\mathbf{C}} = \begin{pmatrix} \tilde{C}_{xx} & \xi \tilde{C}_{xy} \\ \xi \tilde{C}_{yx} & \xi^2 \tilde{C}_{yy} \end{pmatrix}, \tilde{\mathbf{D}} = \begin{pmatrix} \tilde{D}_{xx} & \xi \tilde{D}_{xy} \\ \xi \tilde{D}_{xy} & \xi^2 \tilde{D}_{yy} \end{pmatrix}. \quad (\text{C.5})$$

6 Substituting Eqs. (C.5) into Eqs. (C.3) gives the simplified branching line conditions in  
7 Section 3.4.

### 8 C.4. Original branching area conditions

9 In coordinates  $\tilde{\mathbf{s}}$  defined by Eqs. (C.1), we can apply the original branching area  
10 conditions (Ito and Dieckmann, 2012), as described below.

#### 11 Branching area conditions in arbitrarily distorted two-dimensional trait spaces 12 (original)

13 In an arbitrarily distorted two-dimensional trait space  $\mathbf{s} = (x, y)^T$ , there exists  
14 an evolutionary branching area containing a point  $\mathbf{s}_0$ , if  $\mathbf{s}_0$  satisfies the  
15 following two conditions in the corresponding coordinates  $\tilde{\mathbf{s}} = (\tilde{x}, \tilde{y})^T$  given  
16 by Eqs. (C.1), (12c), and (16) (after rotation of coordinates  $\mathbf{s}$  so that Eq. (15)  
17 holds), where  $\mathbf{R}$  is chosen so that  $\tilde{D}_{xx} > \tilde{D}_{yy}$  and  $\tilde{D}_{xy} = 0$  hold.

18 (i)  $\mathbf{s}_0$  satisfies

$$19 \quad \tilde{C}_{xx} < 0 \quad (\text{C.6a})$$

20 (i.e., convergence stable along  $\tilde{x}$  when  $\tilde{g}_x = 0$ ).

21 (ii)  $\mathbf{s}_0$  satisfies

$$22 \quad \frac{\sigma_x \tilde{D}_{xx}}{\sqrt{2\tilde{g}_x^2 + \tilde{g}_y^2}} > \sqrt{2}\beta \quad (\text{C.6b})$$

23 (i.e., sufficiently evolutionarily unstable along  $\tilde{x}$  when  $\tilde{g}_x = 0$ ).

1

2 The  $\beta$  is a positive constant to prevent condition (ii) from being too conservative.

3 Since  $\beta = \frac{1}{5}$  has shown a good prediction performance in Ito and Dieckmann (2012),

4  $\beta = \frac{1}{5}$  is used in this paper as well.

### 5 **C.5. Simplified branching area conditions**

6 When  $\sigma_y \ll \sigma_x$  holds,  $\mathbf{R}$  for attaining  $\check{D}_{xx} > \check{D}_{yy}$  and  $\check{D}_{xy} = 0$  in the branching area  
 7 conditions above is approximately given by  $\mathbf{I}$ . Then  $\mathbf{R} = \mathbf{I}$  transforms Eqs. (C.2b) into  
 8 Eqs. (C.5). Substituting Eqs. (C.5) into Eqs. (C.6) gives the simplified branching area  
 9 conditions, as described below.

#### 10 **Branching area conditions in arbitrarily distorted two-dimensional trait spaces** 11 **(simplified):**

12 In an arbitrary distorted two-dimensional trait space  $\mathbf{s} = (x, y)^T$ , there exists  
 13 an evolutionary branching area containing a point  $\mathbf{s}_0$ , if  $\mathbf{s}_0$  satisfies the  
 14 following two conditions in the corresponding geodesic coordinates  $\tilde{\mathbf{s}} =$   
 15  $(\tilde{x}, \tilde{y})^T$  given by Eqs. (12c), and (16) (after rotation of coordinates  $\mathbf{s}$  so that  
 16 Eq. (15) holds), under  $\sigma_y \ll \sigma_x$ .

17 (i)  $\mathbf{s}_0$  satisfies

$$18 \quad \tilde{C}_{xx} = C_{xx} + \Omega_{xx} < 0 \quad (\text{C.7a})$$

19 (i.e., convergence stable along  $\tilde{x}$  when  $g_x = 0$ ).

20 (ii)  $\mathbf{s}_0$  satisfies

$$21 \quad \frac{\sigma_x^2 \check{D}_{xx}}{\sqrt{2\sigma_x^2 \tilde{g}_x^2 + \sigma_y^2 \tilde{g}_y^2}} = \frac{\sigma_x^2 [D_{xx} + \Omega_{xx}]}{\sqrt{2\sigma_x^2 g_x^2 + \sigma_y^2 g_y^2}} > \sqrt{2}\beta \quad (\text{C.7b})$$

22 (i.e., sufficiently evolutionarily unstable along  $\tilde{x}$  when  $g_x = 0$ ), where  $\beta = \frac{1}{5}$ .

1

2 Under  $\sigma_y \ll \sigma_x$ , Eq.(C.7b) requires  $|g_x|$  to be very small, while  $|g_y|$  is not  
 3 needed to be very small, which allows  $\Omega_{xx} = g_x Q_{xx}^x + g_y Q_{xx}^y$  to be non-small.  
 4 Therefore, analogously to the case of branching lines, distortion of a trait space affects  
 5 the branching area conditions when  $\sigma_y \ll \sigma_x$ .

6

## 7 Appendix D: Evolutionary branching conditions in distorted trait 8 spaces of arbitrary higher dimensions

9 We derive conditions for evolutionary branching points, lines, and areas in an arbitrarily  
 10 distorted trait space  $\mathbf{s} = (x_1, \dots, x_N)^T$  of an arbitrary dimension  $N$  with  $N \geq 2$ . The  
 11 derivation and the obtained result are analogous to the two-dimensional case (Section  
 12 3 in the main text and Appendix C).

### 13 D.1. Assumption for mutation

14 We generalize the geodesic-constant-mutation assumption for two-dimensional trait  
 15 spaces (Section 3.1) as follows.

#### 16 Geodesic-constant-mutation assumption (for a trait space of an arbitrary dimension):

17 For an arbitrary point  $\mathbf{s}_0 = (x_{0,1}, \dots, x_{0,N})^T$  in an arbitrarily distorted trait space  
 18  $\mathbf{s} = (x_1, \dots, x_N)^T$ , there exist coordinates  $\tilde{\mathbf{s}} = (\tilde{x}_1, \dots, \tilde{x}_N)^T$  defined by

$$19 \quad \mathbf{s} = \tilde{\mathbf{s}} - \frac{1}{2} \begin{pmatrix} (\tilde{\mathbf{s}} - \mathbf{s}_0)^T \mathbf{Q}^1 (\tilde{\mathbf{s}} - \mathbf{s}_0) \\ \vdots \\ (\tilde{\mathbf{s}} - \mathbf{s}_0)^T \mathbf{Q}^N (\tilde{\mathbf{s}} - \mathbf{s}_0) \end{pmatrix}, \quad (\text{D. 1a})$$

20 with an appropriately chosen symmetric matrices  $\mathbf{Q}^1, \dots, \mathbf{Q}^N$ , such that the  
 21 mutation distribution in coordinates  $\tilde{\mathbf{s}}$  can be approximated with a constant  
 22  $N$ -variate Gaussian distribution,



$$\tilde{m}(\tilde{\mathbf{s}}', \tilde{\mathbf{s}}) \approx \frac{1}{(\sqrt{2\pi})^N \sqrt{|\mathbf{V}(\mathbf{s}_0)|}} \exp\left(-\frac{1}{2} [\tilde{\mathbf{s}}' - \tilde{\mathbf{s}}]^T \mathbf{V}(\mathbf{s}_0)^{-1} [\tilde{\mathbf{s}}' - \tilde{\mathbf{s}}]\right), \quad (\text{D.1b})$$

for a resident  $\tilde{\mathbf{s}}$  in the neighborhood of  $\mathbf{s}_0$ , satisfying

$$|\mathbf{v}_i^T [\tilde{\mathbf{s}} - \mathbf{s}_0]| = O(\sigma_i) \quad (\text{D.1c})$$

for all  $i = 1, \dots, N$ , with a sufficiently small  $\sigma_1, \dots, \sigma_N$ , where  $\mathbf{V}(\mathbf{s}_0)$  has eigenvalues  $\sigma_1^2, \dots, \sigma_N^2$  with the corresponding eigenvectors  $\mathbf{v}_1, \dots, \mathbf{v}_N$ , respectively, and  $\sigma_1 \geq \dots \geq \sigma_N \geq 0$  is assumed without loss of generality.

The mutational covariance  $\mathbf{V}(\mathbf{s})$  is an  $N \times N$  symmetric and positive definite matrix

$$\mathbf{V}(\mathbf{s}) = \begin{pmatrix} V_{11}(\mathbf{s}) & \cdots & V_{1N}(\mathbf{s}) \\ \vdots & \ddots & \vdots \\ V_{N1}(\mathbf{s}) & \cdots & V_{NN}(\mathbf{s}) \end{pmatrix}. \quad (\text{D.2})$$

For a given  $\mathbf{V}(\mathbf{s})$ , we choose  $\mathbf{Q}^i$  for  $i = 1, \dots, N$  as

$$\mathbf{Q}^i = \begin{pmatrix} Q_{11}^i & \cdots & Q_{1N}^i \\ \vdots & \ddots & \vdots \\ Q_{N1}^i & \cdots & Q_{NN}^i \end{pmatrix},$$

$$Q_{jk}^i = \frac{1}{2} \sum_{l=1}^N V_{il}(\mathbf{s}_0) [A_{jl}^k + A_{kl}^j - A_{jk}^l],$$

$$\begin{pmatrix} A_{11}^i & \cdots & A_{1N}^i \\ \vdots & \ddots & \vdots \\ A_{N1}^i & \cdots & A_{NN}^i \end{pmatrix} = \left[ \frac{\partial \mathbf{V}(\mathbf{s})^{-1}}{\partial x_i} \right]_{\mathbf{s}=\mathbf{s}_0}, \quad (\text{D.3})$$

so that  $\mathbf{V}(\mathbf{s})^{-1}$  has no linear dependency on  $\tilde{\mathbf{s}}$  at the focal point  $\mathbf{s}_0$  (in order to satisfy Eq. (D.1b)). In differential geometry,  $Q_{jk}^i$  are called the Christoffel symbols of the second kind at  $\mathbf{s}_0$  in the original coordinates  $\mathbf{s}$  with respect to the metric  $\mathbf{V}(\mathbf{s})^{-1}$ .

## D.2. Quadratic approximation of invasion fitness functions

To reduce complexity of the expressions in the subsequent analysis, without loss of generality we assume that coordinates  $\mathbf{s}$  are first rotated so that  $\mathbf{V}(\mathbf{s}_0)$  become a

1 diagonal matrix expressed as

$$2 \quad \mathbf{V}(\mathbf{s}_0) = \begin{pmatrix} \sigma_1^2 & \cdots & 0 \\ \vdots & \ddots & \vdots \\ 0 & \cdots & \sigma_N^2 \end{pmatrix}, \quad (\text{D.5})$$

3 and then the geodesic coordinates  $\tilde{\mathbf{s}}$  are obtained from Eqs. (D.1-3). Then, in the same  
4 manner with Eqs. (5) in the main text, we expand  $f(\mathbf{s}', \mathbf{s})$  around the focal point  $\mathbf{s}_0$  as

$$5 \quad f(\mathbf{s}', \mathbf{s}) = \mathbf{g}^T \boldsymbol{\delta} \mathbf{s} + [\mathbf{s} - \mathbf{s}_0]^T \mathbf{C} \boldsymbol{\delta} \mathbf{s} + \frac{1}{2} \boldsymbol{\delta} \mathbf{s}^T \mathbf{D} \boldsymbol{\delta} \mathbf{s} + \text{h. o. t.}, \quad (\text{D.6a})$$

6 with  $\boldsymbol{\delta} \mathbf{s} = \mathbf{s}' - \mathbf{s}$  and

$$\begin{aligned} \mathbf{g} &= \begin{pmatrix} g_1 \\ \vdots \\ g_N \end{pmatrix} = \nabla_{\mathbf{s}'} f(\mathbf{s}_0, \mathbf{s}_0), \\ \mathbf{C} &= \begin{pmatrix} C_{11} & \cdots & C_{1N} \\ \vdots & \ddots & \vdots \\ C_{N1} & \cdots & C_{NN} \end{pmatrix} = \mathbf{D} + \nabla_{\mathbf{s}} \nabla_{\mathbf{s}'}^T f(\mathbf{s}_0, \mathbf{s}_0), \\ \mathbf{D} &= \begin{pmatrix} D_{11} & \cdots & D_{1N} \\ \vdots & \ddots & \vdots \\ D_{N1} & \cdots & D_{NN} \end{pmatrix} = \nabla_{\mathbf{s}'} \nabla_{\mathbf{s}'}^T f(\mathbf{s}_0, \mathbf{s}_0). \end{aligned} \quad (\text{D.6b})$$

8 Substitution of Eq. (D.1a) into Eqs. (D.6) gives the invasion fitness function in the  
9 geodesic coordinates,

$$10 \quad \tilde{f}(\tilde{\mathbf{s}}', \tilde{\mathbf{s}}) = \tilde{\mathbf{g}}^T \boldsymbol{\delta} \tilde{\mathbf{s}} + [\tilde{\mathbf{s}} - \mathbf{s}_0]^T \tilde{\mathbf{C}} \boldsymbol{\delta} \tilde{\mathbf{s}} + \frac{1}{2} \boldsymbol{\delta} \tilde{\mathbf{s}}^T \tilde{\mathbf{D}} \boldsymbol{\delta} \tilde{\mathbf{s}} + \text{h. o. t.} \quad (\text{D.7a})$$

11 with  $\boldsymbol{\delta} \tilde{\mathbf{s}} = \tilde{\mathbf{s}}' - \tilde{\mathbf{s}}$  and

$$\begin{aligned}\tilde{\mathbf{g}} &= \begin{pmatrix} \tilde{g}_1 \\ \vdots \\ g_N \end{pmatrix} = \mathbf{g}, \\ \tilde{\mathbf{C}} &= \begin{pmatrix} \tilde{C}_{11} & \cdots & \tilde{C}_{1N} \\ \vdots & \ddots & \vdots \\ \tilde{C}_{N1} & \cdots & \tilde{C}_{NN} \end{pmatrix} = \mathbf{C} + \mathbf{\Omega}, \\ \tilde{\mathbf{D}} &= \begin{pmatrix} \tilde{D}_{11} & \cdots & \tilde{D}_{1N} \\ \vdots & \ddots & \vdots \\ \tilde{D}_{N1} & \cdots & \tilde{D}_{NN} \end{pmatrix} = \mathbf{D} + \mathbf{\Omega}, \\ \mathbf{\Omega} &= - \sum_{i=1}^N g_i \mathbf{Q}^i. \end{aligned} \tag{D.7b}.$$

### 2 **D.3. Conditions for evolutionary branching points**

3 In trait spaces of dimensions higher than two, it has not been formally proved yet  
4 whether points that are strongly convergence stable and evolutionarily unstable ensure  
5 high likelihoods of evolutionary branching (but see Geritz et al., 2016). Thus, such  
6 points are called candidate branching points (Ito and Sasaki, 2016). The conditions for  
7 the focal point  $\mathbf{s}_0$  being a candidate evolutionary branching point (Ito and Dieckmann,  
8 2014; Geritz et al., 2016; Ito and Sasaki, 2016) are described as follows.

#### 9 **Candidate-branching-point conditions in distorted $N$ -dimensional trait spaces:**

10 In an arbitrarily distorted  $N$ -dimensional trait space  $\mathbf{s} = (x_1, \dots, x_N)^T$ , a point  
11  $\mathbf{s}_0 = (x_{0,1}, \dots, x_{0,N})^T$  is a candidate-branching-point, if  $\mathbf{s}_0$  satisfies the  
12 following three conditions in the corresponding geodesic coordinates  $\tilde{\mathbf{s}} =$   
13  $(\tilde{x}_1, \dots, \tilde{x}_N)^T$  given by Eqs. (D.1-3) (after rotation of coordinates  $\mathbf{s}$  so that Eq.  
14 (D.5) holds).

15 (i)  $\mathbf{s}_0$  is evolutionarily singular, satisfying

$$16 \quad \tilde{\mathbf{g}} = \mathbf{g} = \mathbf{0}. \tag{D.8a}$$

17 (ii)  $\mathbf{s}_0$  is strongly convergence stable, i.e., the symmetric part of

1 
$$\tilde{\mathbf{C}} = \mathbf{C} + \mathbf{\Omega} \tag{D.8b}$$

2 is negative definite.

3 (iii)  $\mathbf{s}_0$  is evolutionarily unstable, i.e., a symmetric matrix

4 
$$\tilde{\mathbf{D}} = \mathbf{D} + \mathbf{\Omega} \tag{D.8c}$$

5 has at least one positive eigenvalue.

6

7 Since condition (i)  $\tilde{\mathbf{g}} = \mathbf{0}$  requires  $\mathbf{\Omega} = -\sum_{i=1}^N g_i \mathbf{Q}^i = \mathbf{0}$ , we see  $\tilde{\mathbf{C}} = \mathbf{C}$  and  $\tilde{\mathbf{D}} = \mathbf{D}$ .

8 Thus, analogously to the two-dimensional case in the main text, the candidate-

9 branching-point conditions are not affected by the distortion in trait spaces of arbitrary

10 higher-dimensions.

#### 11 **D.4. Conditions for candidate-branching-surfaces**

12 It has not been formally proved yet whether the higher-dimensional extension of

13 branching line conditions (Ito and Dieckmann, 2014) ensures high likelihoods of

14 evolutionary branching. In this sense, we refer to the extended branching line

15 conditions as the “candidate-branching-surface conditions.” If we can find an integer  $L$

16 with  $1 \leq L < N$  such that  $\sigma_L \gg \sigma_{L+1}$  (i.e.,  $\sigma_{L+1}, \dots, \sigma_N$  are all significantly smaller

17 than  $\sigma_1, \dots, \sigma_L$ ), then we can simplify the original candidate-branching-surface

18 conditions (Ito and Dieckmann 2014), in a manner analogous to the two-dimensional

19 case (Appendix C). Consequently, we get the Candidate-branching-surface conditions

20 for distorted trait spaces of arbitrary dimensions, described below.

21 **Candidate-branching-surface conditions in distorted trait spaces of arbitrary**

22 **dimensions (simplified):**

23 In an arbitrarily distorted  $N$ -dimensional trait space  $\mathbf{s} = (x_1, \dots, x_N)^T$ , there

24 exists an  $(N - L)$ -dimensional candidate-branching-surface containing a

1 point  $\mathbf{s}_0$ , if  $\mathbf{s}_0$  satisfies the following four conditions in the corresponding  
 2 geodesic coordinates  $\tilde{\mathbf{s}}$  given by Eqs. (D.1-3) (after rotation of coordinates  $\mathbf{s}$   
 3 so that Eq. (D.5) holds).

4 (i) At  $\mathbf{s}_0$  the sensitivity of  $\tilde{f}(\tilde{\mathbf{s}}', \tilde{\mathbf{s}})$  to single mutational changes of  $\tilde{\mathbf{s}}'$  and  $\tilde{\mathbf{s}}$   
 5 is significantly lower in a subspace  $\tilde{\mathbf{y}} = (\tilde{y}_{L+1}, \dots, \tilde{y}_N)^T = (\tilde{x}_{L+1}, \dots, \tilde{x}_N)^T$  than  
 6 in  $\tilde{\mathbf{x}} = (\tilde{x}_1, \dots, \tilde{x}_L)^T$ , satisfying

$$7 \quad \frac{\frac{\sigma_j}{\sigma_1} [|\tilde{g}_j| + |\tilde{C}_{ij}| + |\tilde{C}_{ji}| + |\tilde{D}_{ij}|] + \frac{\sigma_j^2}{\sigma_1^2} [|\tilde{C}_{jj}| + |\tilde{D}_{jj}|]}{|\tilde{g}_i| + |\tilde{C}_{ii}| + |\tilde{D}_{ii}|} = O(\sigma_1), \quad (\text{D.9a})$$

8 for all  $i = 1, \dots, L$  and  $j = L + 1, \dots, N$ , so that the normalized invasion fitness  
 9 function can be simplified into

$$10 \quad \tilde{f}(\tilde{\mathbf{s}}', \tilde{\mathbf{s}}) = \tilde{\mathbf{g}}_{\mathbf{x}}^T \delta \tilde{\mathbf{x}} + \tilde{\mathbf{g}}_{\mathbf{y}}^T \delta \tilde{\mathbf{y}} + [\tilde{\mathbf{x}} - \mathbf{x}_0]^T \tilde{\mathbf{C}}_{\mathbf{xx}} \delta \tilde{\mathbf{x}} + \frac{1}{2} \delta \tilde{\mathbf{x}}^T \tilde{\mathbf{D}}_{\mathbf{xx}} \delta \tilde{\mathbf{x}} + O(\sigma_1^3), \quad (\text{D.9b})$$

11 with  $\mathbf{x}_0 = (x_{0,1}, \dots, x_{0,L})^T$  and

$$12 \quad \tilde{\mathbf{g}}_{\mathbf{x}} = \begin{pmatrix} \tilde{g}_1 \\ \vdots \\ \tilde{g}_L \end{pmatrix}, \tilde{\mathbf{g}}_{\mathbf{y}} = \begin{pmatrix} \tilde{g}_{L+1} \\ \vdots \\ \tilde{g}_N \end{pmatrix},$$

$$\tilde{\mathbf{C}}_{\mathbf{xx}} = \begin{pmatrix} \tilde{C}_{11} & \cdots & \tilde{C}_{1L} \\ \vdots & \ddots & \vdots \\ \tilde{C}_{L1} & \cdots & \tilde{C}_{LL} \end{pmatrix}, \tilde{\mathbf{D}}_{\mathbf{xx}} = \begin{pmatrix} \tilde{D}_{11} & \cdots & \tilde{D}_{1L} \\ \vdots & \ddots & \vdots \\ \tilde{D}_{L1} & \cdots & \tilde{D}_{LL} \end{pmatrix}. \quad (\text{D.9c})$$

13 (ii)  $\mathbf{s}_0$  is evolutionarily singular in subspace  $\tilde{\mathbf{x}}$ , satisfying

$$14 \quad \tilde{\mathbf{g}}_{\mathbf{x}} = \mathbf{g}_{\mathbf{x}} = \mathbf{0}. \quad (\text{D.9d})$$

15 (iii)  $\mathbf{s}_0$  is strongly convergence stable in subspace  $\tilde{\mathbf{x}}$ , i.e., the symmetric part  
 16 of

$$17 \quad \tilde{\mathbf{C}}_{\mathbf{xx}} = \mathbf{C}_{\mathbf{xx}} + \mathbf{\Omega}_{\mathbf{xx}} \quad (\text{D.9e})$$

18 is negative definite, where

$$\mathbf{\Omega}_{\mathbf{xx}} = - \sum_{i=1}^N g_i \mathbf{Q}_{\mathbf{xx}}^i,$$

1

$$\mathbf{Q}_{\mathbf{xx}}^i = \begin{pmatrix} Q_{11}^i & \cdots & Q_{1L}^i \\ \vdots & \ddots & \vdots \\ Q_{L1}^i & \cdots & Q_{LL}^i \end{pmatrix}. \quad (\text{D. 9f})$$

2

(iii)  $\mathbf{s}_0$  is sufficiently evolutionarily unstable (corresponding to disruptive selection) in subspace  $\tilde{\mathbf{x}}$ , satisfying

3

$$\frac{\lambda_{\max}(\mathbf{W}_{\tilde{\mathbf{x}}} \tilde{\mathbf{D}}_{\mathbf{xx}} \mathbf{W}_{\tilde{\mathbf{x}}})}{|\mathbf{W}_{\tilde{\mathbf{y}}} \tilde{\mathbf{g}}_{\tilde{\mathbf{y}}}|} = \frac{\lambda_{\max}(\mathbf{W}_{\mathbf{x}} [\mathbf{D}_{\mathbf{xx}} + \mathbf{\Omega}_{\mathbf{xx}}] \mathbf{W}_{\mathbf{x}})}{|\mathbf{W}_{\mathbf{y}} \tilde{\mathbf{g}}_{\mathbf{y}}|} > \sqrt{2}. \quad (\text{D. 9g})$$

4

where  $\mathbf{W}_{\mathbf{x}}$  and  $\mathbf{W}_{\mathbf{y}}$  are diagonal matrices with their diagonal components  $\sigma_1, \dots, \sigma_L$  and  $\sigma_{L+1}, \dots, \sigma_N$ , respectively, and  $\lambda_{\max}()$  gives the maximum eigenvalue of its argument matrix.

5

Note that even when condition (ii),  $\mathbf{g}_{\mathbf{x}} = (g_1, \dots, g_L)^T = \mathbf{0}$ , is satisfied,  $\mathbf{g}_{\mathbf{y}} = (g_{L+1}, \dots, g_N)^T$  can make  $\mathbf{\Omega}_{\mathbf{xx}} = -\sum_{j=L+1}^N g_j \mathbf{Q}_{\mathbf{xx}}^j$  non-zero. Therefore, analogously to the two-dimensional case (Section 3.4 and Appendix C.4), the candidate-branching-surface conditions are affected by the distortion.

6

When the subspace  $\tilde{\mathbf{x}}$  is one-dimensional ( $L = 1$ ), the candidate-branching-surface conditions are proved to ensure evolutionary branching in the maximum likelihood invasion-event paths (Ito and Dieckmann, 2014). But for other cases ( $L > 1$ ), those conditions only give candidates, which do not ensure high likelihoods for evolutionary branching.

7

When  $\sigma_L \gg \sigma_{L+1}$  is satisfied, all possible mutants are almost restricted to  $\tilde{\mathbf{y}} = \mathbf{y}_0 = (y_{0,L+1}, \dots, y_{0,N})^T$ , which upon substituting into Eq. (D.1a) gives an  $(N - L)$ -dimensional constraint surface expressed in coordinates  $\mathbf{s}$ ,

8

$$1 \quad \mathbf{y} = \mathbf{y}_0 - \frac{1}{2} \begin{pmatrix} [\mathbf{x} - \mathbf{x}_0]^T \mathbf{Q}_{\mathbf{xx}}^{L+1} [\mathbf{x} - \mathbf{x}_0] \\ \vdots \\ [\mathbf{x} - \mathbf{x}_0]^T \mathbf{Q}_{\mathbf{xx}}^N [\mathbf{x} - \mathbf{x}_0] \end{pmatrix} + \text{h. o. t.} \quad (\text{D.10a})$$

2 If  $\sigma_{L+1}, \dots, \sigma_N$  are all zero, then the candidate-branching-surface conditions (Eqs.  
3 (D.9)) become identical to the conditions for candidate-branching-points along a  
4 constraint surface locally described in the form of Eq. (D.10a), derived by Ito and Sasaki  
5 (2016). Specifically, we describe the constraint surface, Eq. (D.10a), as

$$6 \quad h_j(\mathbf{s}) = y_j - y_{0,j} + \frac{1}{2} [\mathbf{x} - \mathbf{x}_0]^T \mathbf{Q}_{\mathbf{xx}}^j [\mathbf{x} - \mathbf{x}_0] + \text{h. o. t.} = 0. \quad (\text{D.10b})$$

7 for  $j = L + 1, \dots, N$ , and define a Lagrange invasion fitness

$$8 \quad F(\mathbf{s}'; \mathbf{s}; \boldsymbol{\lambda}) = f(\mathbf{s}'; \mathbf{s}) - \sum_{j=L+1}^N \lambda_j [h_j(\mathbf{s}') - h_j(\mathbf{s})]. \quad (\text{D.10c})$$

9 Then by Theorem 2 in Ito and Sasaki (2016), we get  $\boldsymbol{\lambda} = (\lambda_{L+1}, \dots, \lambda_M)^T = \mathbf{g}_y$ , and find  
10 the fitness gradient  $\mathbf{g}_h$ , fitness gradient variability  $\mathbf{C}_h$ , and fitness curvature  $\mathbf{D}_h$  along  
11 the constraint surface at the focal point  $\mathbf{s}_0$  as

$$12 \quad \begin{aligned} \mathbf{g}_h &= \mathbf{E}^T \mathbf{g} = \mathbf{g}_x = \tilde{\mathbf{g}}_x, \\ \mathbf{C}_h &= \mathbf{E}^T [\nabla_{\mathbf{s}'} \nabla_{\mathbf{s}'}^T F(\mathbf{s}_0, \mathbf{s}_0; \boldsymbol{\lambda}) + \nabla_{\mathbf{s}} \nabla_{\mathbf{s}'}^T F(\mathbf{s}_0, \mathbf{s}_0; \boldsymbol{\lambda})] \mathbf{E} = \mathbf{C}_{\mathbf{xx}} - \sum_{j=L+1}^M g_j \mathbf{Q}_{\mathbf{xx}}^j, \\ \mathbf{D}_h &= \mathbf{E}^T \nabla_{\mathbf{s}'} \nabla_{\mathbf{s}'}^T F(\mathbf{s}_0, \mathbf{s}_0; \boldsymbol{\lambda}) \mathbf{E} = \mathbf{D}_{\mathbf{xx}} - \sum_{j=L+1}^M g_j \mathbf{Q}_{\mathbf{xx}}^j \end{aligned} \quad (\text{D.11d})$$

13 where  $\mathbf{E} = (\mathbf{e}_1, \dots, \mathbf{e}_L) = \begin{pmatrix} \mathbf{I}_{L,L} \\ \mathbf{0}_{N-L, N-L} \end{pmatrix}$  consists of the orthogonal base vectors  $\mathbf{e}_1, \dots, \mathbf{e}_L$   
14 of the tangent plane of the surface at  $\mathbf{s}_0$ , with  $\mathbf{I}_{L,L}$  an  $L \times L$  identity matrix and  
15  $\mathbf{0}_{N-L, N-L}$  an  $(N - L) \times (N - L)$  zero matrix. Thus, when Eq. (D9d),  $\mathbf{g}_x =$   
16  $(g_1, \dots, g_L)^T = \mathbf{0}$ , holds,  $\mathbf{C}_h = \tilde{\mathbf{C}}_{\mathbf{xx}}$  and  $\mathbf{D}_h = \tilde{\mathbf{D}}_{\mathbf{xx}}$  both hold. Therefore, the above  
17 candidate-branching surface conditions under  $\sigma_{L+1}, \dots, \sigma_N = 0$  are identical to the  
18 branching point conditions along  $(N - L)$ -dimensional constraint surfaces (Ito and  
19 Sasaki, 2016).

## 1 D.5. Branching area conditions

2 The branching area conditions have not been developed for trait spaces of dimensions  
 3 higher than two. Here we heuristically extend the simplified candidate-branching-  
 4 surface conditions in Appendix D.4 into the simplified branching area conditions, in a  
 5 manner analogous to the two-dimensional case. Specifically, we propose the higher-  
 6 dimensional simplified branching area conditions as follows.

### 7 Branching area conditions in distorted trait spaces of arbitrary dimensions (simplified)

8 In an arbitrarily distorted  $N$ -dimensional trait space  $\mathbf{s} = (x_1, \dots, x_N)^T$ , there  
 9 exists an evolutionary branching area containing a point  $\mathbf{s}_0$ , if  $\mathbf{s}_0$  satisfies  
 10 the following two conditions in the corresponding geodesic coordinates  $\tilde{\mathbf{s}}$   
 11 given by Eqs. (D.1-3) (after rotation of coordinates  $\mathbf{s}$  so that Eq. (D.5) holds),  
 12 under  $\sigma_1, \dots, \sigma_L \gg \sigma_{L+1}, \dots, \sigma_N$ .

13 (i) The symmetric part of

$$14 \quad \tilde{\mathbf{C}}_{\mathbf{xx}} = \mathbf{C}_{\mathbf{xx}} + \mathbf{\Omega}_{\mathbf{xx}} \quad (\text{D.11a})$$

15 is negative definite (i.e.,  $\mathbf{s}_0$  is strongly convergence stable in subspace  $\tilde{\mathbf{x}}$   
 16 when  $\mathbf{g}_{\mathbf{x}} = \mathbf{0}$ ).

17 (ii)  $\mathbf{s}_0$  satisfies

$$18 \quad \frac{\lambda_{\max}(\mathbf{W}_{\mathbf{x}} \tilde{\mathbf{D}}_{\mathbf{xx}} \mathbf{W}_{\mathbf{x}})}{\sqrt{2|\mathbf{W}_{\mathbf{x}} \tilde{\mathbf{g}}_{\mathbf{x}}|^2 + |\mathbf{W}_{\mathbf{y}} \tilde{\mathbf{g}}_{\mathbf{y}}|^2}} = \frac{\lambda_{\max}(\mathbf{W}_{\mathbf{x}} [\mathbf{D}_{\mathbf{xx}} + \mathbf{\Omega}_{\mathbf{xx}}] \mathbf{W}_{\mathbf{x}})}{\sqrt{2|\mathbf{W}_{\mathbf{x}} \mathbf{g}_{\mathbf{x}}|^2 + |\mathbf{W}_{\mathbf{y}} \mathbf{g}_{\mathbf{y}}|^2}} > \sqrt{2}\beta \quad (\text{D.11b})$$

19 with  $\beta = \frac{1}{5}$  (i.e.,  $\mathbf{s}_0$  is sufficiently evolutionarily unstable in subspace  $\tilde{\mathbf{x}}$   
 20 when  $\mathbf{g}_{\mathbf{x}} = \mathbf{0}$ ), where  $\mathbf{W}_{\mathbf{x}}$  and  $\mathbf{W}_{\mathbf{y}}$  are diagonal matrices with its diagonal  
 21 components  $\sigma_1, \dots, \sigma_L$  and  $\sigma_{L+1}, \dots, \sigma_N$ , respectively, and  $\lambda_{\max}()$  gives the  
 22 maximum eigenvalue of its argument matrix.

23



1 Under  $\sigma_1, \dots, \sigma_L \gg \sigma_{L+1}, \dots, \sigma_N$ , i.e.,  $\lambda_{\max}(\mathbf{W}_x) \gg \lambda_{\max}(\mathbf{W}_y)$ , Eq.(D.11b) requires  
 2  $|\mathbf{g}_x| = |(g_1, \dots, g_L)^T|$  to be very small, while  $|\mathbf{g}_y| = |(g_{L+1}, \dots, g_N)^T|$  is not needed to  
 3 be very small, which allows  $\mathbf{\Omega}_{xx} = \sum_{j=1}^L g_j \mathbf{Q}_{xx}^i + \sum_{j=L+1}^N g_j \mathbf{Q}_{xx}^i$  to be non-small.  
 4 Therefore, analogously to the two-dimensional case in Appendix C.5, the distortion  
 5 affects the branching area conditions under  $\sigma_1, \dots, \sigma_L \gg \sigma_{L+1}, \dots, \sigma_N$ , in distorted trait  
 6 spaces of arbitrary dimensions.

7

## 8 Appendix E: Describing directional evolution in geodesic 9 coordinates

10 When the mutation distribution non-negligibly deviates from the Gaussian distribution,  
 11 the canonical equation for directional evolution, Eqs. (1) in the main text, may not be  
 12 warranted (Dieckmann and Law, 1996). In this case, if the geodesic-constant-mutation  
 13 assumption (Section 3.1 and Appendix D.1, for two- and the higher-dimensional trait  
 14 spaces, respectively) holds good, the canonical equation described in the geodesic  
 15 coordinates is still warranted.

16 Specifically, in a trait space  $\mathbf{s} = (x_1, \dots, x_N)^T$  of an arbitrary dimension  $N$ , we  
 17 assume a directionally evolving population with a resident phenotype  $\mathbf{s}$ . Even when the  
 18 mutation distribution  $m(\mathbf{s}', \mathbf{s})$  cannot be approximated with an  $N$ -variate Gaussian  
 19 distribution, the geodesic coordinates for the focal point  $\mathbf{s}_0$  chosen at the resident  
 20 phenotype  $\mathbf{s}$  allows the approximation, if the geodesic-constant-mutation assumption  
 21 holds. In this case, in the same manner with Eqs. (1), we can describe the directional  
 22 evolution in the geodesic coordinates  $\tilde{\mathbf{s}}$  as

$$23 \quad \frac{d\tilde{\mathbf{s}}}{dt} = \frac{1}{2} \mu \hat{n} \mathbf{V}(\mathbf{s}_0) \tilde{\mathbf{g}}(\mathbf{s}_0), \quad (\text{E. 1a})$$

1 with

$$2 \quad \mathbf{s} = \tilde{\mathbf{s}} - \frac{1}{2} \begin{pmatrix} (\tilde{\mathbf{s}} - \mathbf{s}_0)^T \mathbf{Q}^x (\tilde{\mathbf{s}} - \mathbf{s}_0) \\ (\tilde{\mathbf{s}} - \mathbf{s}_0)^T \mathbf{Q}^y (\tilde{\mathbf{s}} - \mathbf{s}_0) \end{pmatrix}, \quad (\text{E. 1b})$$

3 where  $\tilde{\mathbf{g}}(\mathbf{s}_0)$  is the fitness gradient in coordinates  $\tilde{\mathbf{s}}$ . For  $\tilde{\mathbf{s}} = \mathbf{s}_0$ , we see that

$$4 \quad \frac{d\tilde{\mathbf{s}}}{dt} = \frac{d\mathbf{s}}{dt},$$

$$\tilde{\mathbf{g}}(\mathbf{s}_0) = \begin{pmatrix} \frac{\partial \tilde{f}(\tilde{\mathbf{s}}', \tilde{\mathbf{s}})}{\partial \tilde{x}'} \\ \frac{\partial \tilde{f}(\tilde{\mathbf{s}}', \tilde{\mathbf{s}})}{\partial \tilde{y}'} \end{pmatrix}_{\tilde{\mathbf{s}}' = \tilde{\mathbf{s}} = \mathbf{s}_0} = \begin{pmatrix} \frac{\partial f(\mathbf{s}', \mathbf{s})}{\partial x'} \\ \frac{\partial f(\mathbf{s}', \mathbf{s})}{\partial y'} \end{pmatrix}_{\mathbf{s}' = \mathbf{s} = \mathbf{s}_0} = \mathbf{g}(\mathbf{s}_0), \quad (\text{E. 2})$$

5 which upon substitution into Eq. (E.1a) gives

$$6 \quad \frac{d\mathbf{s}}{dt} = \frac{1}{2} \mu \hat{n} \mathbf{V}(\mathbf{s}_0) \mathbf{g}(\mathbf{s}_0). \quad (\text{E. 3})$$

7 Replacing  $\mathbf{s}_0$  with  $\mathbf{s}$  gives

$$8 \quad \frac{d\mathbf{s}}{dt} = \frac{1}{2} \mu \hat{n} \mathbf{V}(\mathbf{s}) \mathbf{g}(\mathbf{s}). \quad (\text{E. 4})$$

9 Eq. (E.4) is the same with Eq. (1a) in the main text except that  $\mathbf{V}_m(\mathbf{s})$  is replaced with  
 10  $\mathbf{V}(\mathbf{s})$ . Note that differentiation of Eq. (E.4) is not warranted. Thus, for numerical  
 11 simulation by differentiation, Eq. (E.1) is better than Eq. (E.4).

12

## 13 Appendix F: Analysis of evolutionary branching in Example

14 In the main text, the original coordinates  $\mathbf{s}$  are first rotated so that its mutational  
 15 covariance at the focal point becomes diagonal, and then the rotated coordinates are  
 16 denoted by  $\mathbf{s}$  again. To avoid confusion, only in this section we distinguish the original  
 17 coordinates before the rotation and after the rotation, by calling the former the “original  
 18 coordinates”, denoted by  $\bar{\mathbf{s}} = (\bar{x}, \bar{y})^T$ , and calling the latter the “rotated original  
 19 coordinates”, denoted by  $\mathbf{s} = (x, y)^T$ .

## 1 F.1. Mutational covariance

2 In coordinates  $\mathbf{u} = (\theta, r)^T$ , the mutational covariance is given by a constant diagonal  
3 matrix

$$4 \quad \mathbf{V}_{\mathbf{u}} = \begin{pmatrix} \sigma_{\theta}^2 & 0 \\ 0 & \sigma_r^2 \end{pmatrix}. \quad (\text{F.1})$$

5 Since  $\mathbf{V}_{\mathbf{u}}^{-1}$  can be treated as a metric for coordinates  $\mathbf{u}$ , we describe the mutational  
6 square distance from  $\mathbf{u}$  to  $\mathbf{u} + \mathbf{du}$  with infinitesimal  $\mathbf{du} = (d\theta, dr)^T$  as

$$7 \quad dl^2 = \mathbf{du}^T \mathbf{V}_{\mathbf{u}}^{-1} \mathbf{du}. \quad (\text{F.2})$$

8 By taking the first derivative of Eqs. (26) in the main text,

$$9 \quad \begin{aligned} \bar{x} &= r \sin \theta, \\ \bar{y} &= r \cos \theta, \end{aligned} \quad (\text{F.3})$$

10 we express an infinitesimally small  $\mathbf{d}\bar{\mathbf{s}} = (d\bar{x}, d\bar{y})^T$  as

$$11 \quad \mathbf{d}\bar{\mathbf{s}} = \begin{pmatrix} d\bar{x} \\ d\bar{y} \end{pmatrix} = \begin{pmatrix} \frac{\partial \bar{x}}{\partial \theta} & \frac{\partial \bar{x}}{\partial r} \\ \frac{\partial \bar{y}}{\partial \theta} & \frac{\partial \bar{y}}{\partial r} \end{pmatrix} \begin{pmatrix} d\theta \\ dr \end{pmatrix} = \begin{pmatrix} r \cos \theta & \sin \theta \\ -r \sin \theta & \cos \theta \end{pmatrix} \begin{pmatrix} d\theta \\ dr \end{pmatrix}, \quad (\text{F.4})$$

12 which gives

$$\begin{aligned} \mathbf{du} = \begin{pmatrix} d\theta \\ dr \end{pmatrix} &= \begin{pmatrix} r \cos \theta & \sin \theta \\ -r \sin \theta & \cos \theta \end{pmatrix}^{-1} \mathbf{d}\bar{\mathbf{s}} = \begin{pmatrix} r^{-1} \cos \theta & -r^{-1} \sin \theta \\ \sin \theta & \cos \theta \end{pmatrix} \mathbf{d}\bar{\mathbf{s}} \\ &= \begin{pmatrix} r^{-1} & 0 \\ 0 & 1 \end{pmatrix} \mathbf{P}(\theta)^T \mathbf{d}\bar{\mathbf{s}}, \\ \mathbf{P}(\theta) &= \begin{pmatrix} \cos \theta & \sin \theta \\ -\sin \theta & \cos \theta \end{pmatrix}. \end{aligned} \quad (\text{F.5})$$

14 Substituting Eq. (F.5) into Eq. (F.2) gives

$$\begin{aligned} dl^2 &= \mathbf{d}\bar{\mathbf{s}}^T \mathbf{P}(\theta) \begin{pmatrix} r^{-2} \sigma_{\theta}^{-2} & 0 \\ 0 & \sigma_r^{-2} \end{pmatrix} \mathbf{P}(\theta)^T \mathbf{d}\bar{\mathbf{s}} \\ &= \mathbf{d}\bar{\mathbf{s}}^T \bar{\mathbf{V}}(\bar{\mathbf{s}})^{-1} \mathbf{d}\bar{\mathbf{s}}, \end{aligned} \quad (\text{F.6})$$

16 which gives the mutational metric in the original coordinates,

$$\bar{\mathbf{V}}(\bar{\mathbf{s}})^{-1} = \mathbf{P}(\theta) \begin{pmatrix} r^{-2}\sigma_{\theta}^{-2} & 0 \\ 0 & \sigma_r^{-2} \end{pmatrix} \mathbf{P}(\theta)^T. \quad (\text{F.7})$$

Next, we rotate the original coordinates  $\bar{\mathbf{s}}$  about the focal point  $\bar{\mathbf{s}}_0 = (\bar{x}_0, \bar{y}_0)^T = (r_0 \sin \theta_0, r_0 \cos \theta_0)^T$  into the rotated original coordinates  $\mathbf{s} = (x, y)^T$  by

$$\bar{\mathbf{s}} - \bar{\mathbf{s}}_0 = \mathbf{P}(\theta_0)[\mathbf{s} - \bar{\mathbf{s}}_0] \quad (\text{F.8})$$

with a rotation matrix  $\mathbf{P}(\theta_0)$ . Eq. (F.8) gives  $d\bar{\mathbf{s}} = \mathbf{P}(\theta_0)d\mathbf{s}$ , and substituting it into Eq. (F.6) gives

$$\begin{aligned} dl^2 &= d\mathbf{s}^T \mathbf{P}(\theta_0)^T \mathbf{P}(\theta) \begin{pmatrix} r^{-2}\sigma_{\theta}^{-2} & 0 \\ 0 & \sigma_r^{-2} \end{pmatrix} \mathbf{P}(\theta)^T \mathbf{P}(\theta_0) d\mathbf{s} \\ &= d\mathbf{s}^T \mathbf{P}(\theta - \theta_0) \begin{pmatrix} r^{-2}\sigma_{\theta}^{-2} & 0 \\ 0 & \sigma_r^{-2} \end{pmatrix} \mathbf{P}(\theta - \theta_0)^T d\mathbf{s}, \end{aligned} \quad (\text{F.9})$$

from which we get the mutational metric in the rotated original coordinates,

$$\begin{aligned} \mathbf{V}(\mathbf{s})^{-1} &= \mathbf{P}(\phi) \mathbf{L}(r) \mathbf{P}(\phi)^T, \\ \mathbf{L}(r) &= \begin{pmatrix} r^{-2}\sigma_{\theta}^{-2} & 0 \\ 0 & \sigma_r^{-2} \end{pmatrix}, \\ \mathbf{P}(\phi) &= \begin{pmatrix} \cos \phi & \sin \phi \\ -\sin \phi & \cos \phi \end{pmatrix}, \end{aligned} \quad (\text{F.10})$$

where  $\phi = \theta - \theta_0$ , and  $\mathbf{V}(\bar{\mathbf{s}}_0)$  is given by

$$\mathbf{V}(\bar{\mathbf{s}}_0) = \mathbf{L}(r_0)^{-1} = \begin{pmatrix} r_0^2 \sigma_{\theta}^2 & 0 \\ 0 & \sigma_r^2 \end{pmatrix} = \begin{pmatrix} \sigma_x^2 & 0 \\ 0 & \sigma_y^2 \end{pmatrix}. \quad (\text{F.11})$$

For convenience, we express  $\mathbf{s} - \bar{\mathbf{s}}_0$  in terms of  $r$  and  $\phi = \theta - \theta_0$ , as

$$\begin{aligned} \mathbf{s} - \bar{\mathbf{s}}_0 &= \mathbf{P}(\theta_0)^T [\bar{\mathbf{s}} - \bar{\mathbf{s}}_0] = \begin{pmatrix} \cos \theta_0 & -\sin \theta_0 \\ \sin \theta_0 & \cos \theta_0 \end{pmatrix} \left[ \begin{pmatrix} r \sin \theta \\ r \cos \theta \end{pmatrix} - \begin{pmatrix} r_0 \sin \theta_0 \\ r_0 \cos \theta_0 \end{pmatrix} \right] \\ &= r \begin{pmatrix} \sin \theta \cos \theta_0 - \cos \theta \sin \theta_0 \\ \sin \theta \sin \theta_0 + \cos \theta \cos \theta_0 \end{pmatrix} - \begin{pmatrix} 0 \\ r_0 \end{pmatrix} \\ &= r \begin{pmatrix} \sin \phi \\ \cos \phi \end{pmatrix} - \begin{pmatrix} 0 \\ r_0 \end{pmatrix} \end{aligned} \quad (\text{F.12})$$

Note that the focal point  $\bar{\mathbf{s}}_0 = (\bar{x}_0, \bar{y}_0)^T$  corresponds to  $(\phi, r)^T = (\phi_0, r_0)^T$  with  $\phi_0 = 0$ .

## 1 F.2. Distortion matrices

2 By using Eq. (F.10), we express the first derivative of the mutational metric  $\mathbf{V}(\mathbf{s})^{-1}$  as

$$\begin{aligned} 3 \left[ \frac{\partial \mathbf{V}(\mathbf{s})^{-1}}{\partial x} \right]_{\mathbf{s}=\bar{\mathbf{s}}_0} &= \left[ \frac{\partial \mathbf{P}(\phi)}{\partial x} \mathbf{L}(r) \mathbf{P}(\phi)^T + \mathbf{P}(\phi) \mathbf{L}(r) \frac{\partial \mathbf{P}(\phi)^T}{\partial x} + \mathbf{P}(\phi) \frac{\partial \mathbf{L}(r)}{\partial x} \mathbf{P}(\phi)^T \right]_{\mathbf{s}=\bar{\mathbf{s}}_0} \\ &= \left[ \frac{\partial \mathbf{P}(\phi)}{\partial x} \right]_{\mathbf{s}=\bar{\mathbf{s}}_0} \mathbf{L}(r_0) + \mathbf{L}(r_0) \left[ \frac{\partial \mathbf{P}(\phi)}{\partial x} \right]_{\mathbf{s}=\bar{\mathbf{s}}_0}^T + \left[ \frac{\partial \mathbf{L}(r)}{\partial x} \right]_{\mathbf{s}=\bar{\mathbf{s}}_0} \end{aligned} \quad (\text{F.13a})$$

4 and

$$\begin{aligned} 5 \left[ \frac{\partial \mathbf{V}(\mathbf{s})^{-1}}{\partial y} \right]_{\mathbf{s}=\bar{\mathbf{s}}_0} &= \left[ \frac{\partial \mathbf{P}(\phi)}{\partial y} \mathbf{L}(r) \mathbf{P}(\phi)^T + \mathbf{P}(\phi) \mathbf{L}(r) \frac{\partial \mathbf{P}(\phi)^T}{\partial y} + \mathbf{P}(\phi) \frac{\partial \mathbf{L}(r)}{\partial y} \mathbf{P}(\phi)^T \right]_{\mathbf{s}=\bar{\mathbf{s}}_0} \\ &= \left[ \frac{\partial \mathbf{P}(\phi)}{\partial y} \right]_{\mathbf{s}=\bar{\mathbf{s}}_0} \mathbf{L}(r_0) + \mathbf{L}(r_0) \left[ \frac{\partial \mathbf{P}(\phi)}{\partial y} \right]_{\mathbf{s}=\bar{\mathbf{s}}_0}^T + \left[ \frac{\partial \mathbf{L}(r)}{\partial y} \right]_{\mathbf{s}=\bar{\mathbf{s}}_0}. \end{aligned} \quad (\text{F.13b})$$

6 From Eqs. (F.12) we see

$$\begin{aligned} 7 \begin{pmatrix} \frac{\partial \phi}{\partial x} & \frac{\partial \phi}{\partial y} \\ \frac{\partial r}{\partial x} & \frac{\partial r}{\partial y} \end{pmatrix} &= \begin{pmatrix} \frac{\partial x}{\partial \phi} & \frac{\partial x}{\partial r} \\ \frac{\partial y}{\partial \phi} & \frac{\partial y}{\partial r} \end{pmatrix}^{-1} = \begin{pmatrix} r \cos \phi & \sin \phi \\ -r \sin \phi & \cos \phi \end{pmatrix}^{-1} \\ &= \begin{pmatrix} r^{-1} \cos \phi & -r^{-1} \sin \phi \\ \sin \phi & \cos \phi \end{pmatrix} \end{aligned} \quad (\text{F.14})$$

8 and thus

$$\left[ \frac{\partial \mathbf{P}(\phi)}{\partial x} \right]_{\mathbf{s}=\bar{\mathbf{s}}_0} = \left[ \frac{\partial \mathbf{P}(\phi)}{\partial \phi} \frac{\partial \phi}{\partial x} + \frac{\partial \mathbf{P}(\phi)}{\partial r} \frac{\partial r}{\partial x} \right]_{\mathbf{s}=\bar{\mathbf{s}}_0} = r_0^{-1} \begin{pmatrix} 0 & 1 \\ -1 & 0 \end{pmatrix},$$

9

$$\left[ \frac{\partial \mathbf{P}(\phi)}{\partial y} \right]_{\mathbf{s}=\bar{\mathbf{s}}_0} = \left[ \frac{\partial \mathbf{P}(\phi)}{\partial \phi} \frac{\partial \phi}{\partial y} + \frac{\partial \mathbf{P}(\phi)}{\partial r} \frac{\partial r}{\partial y} \right]_{\mathbf{s}=\bar{\mathbf{s}}_0} = \begin{pmatrix} 0 & 0 \\ 0 & 0 \end{pmatrix}, \quad (\text{F.15a})$$

10 and

$$\left[ \frac{\partial \mathbf{L}(r)}{\partial x} \right]_{\mathbf{s}=\bar{\mathbf{s}}_0} = \left[ \frac{\partial \mathbf{L}(r)}{\partial \phi} \frac{\partial \phi}{\partial x} + \frac{\partial \mathbf{L}(r)}{\partial r} \frac{\partial r}{\partial x} \right]_{\mathbf{s}=\bar{\mathbf{s}}_0} = \begin{pmatrix} 0 & 0 \\ 0 & 0 \end{pmatrix},$$

11

$$\left[ \frac{\partial \mathbf{L}(r)}{\partial y} \right]_{\mathbf{s}=\bar{\mathbf{s}}_0} = \left[ \frac{\partial \mathbf{L}(r)}{\partial \phi} \frac{\partial \phi}{\partial y} + \frac{\partial \mathbf{L}(r)}{\partial r} \frac{\partial r}{\partial y} \right]_{\mathbf{s}=\bar{\mathbf{s}}_0} = \left[ \frac{\partial \mathbf{L}(r)}{\partial r} \right]_{\mathbf{s}=\bar{\mathbf{s}}_0} = \begin{pmatrix} -2r_0^{-3} \sigma_\theta^{-2} & 0 \\ 0 & 0 \end{pmatrix}. \quad (\text{F.15b})$$

1 Substituting Eqs. (F.15) into Eqs. (F.13) gives

$$\begin{aligned}
 \left[ \frac{\partial \mathbf{V}(\mathbf{s})^{-1}}{\partial x} \right]_{\mathbf{s}=\bar{\mathbf{s}}_0} &= \left[ \frac{\partial \mathbf{P}(\phi)}{\partial x} \right]_{\mathbf{s}=\bar{\mathbf{s}}_0} \mathbf{L}(r_0) + \mathbf{L}(r_0) \left[ \frac{\partial \mathbf{P}(\phi)}{\partial x} \right]_{\mathbf{s}=\bar{\mathbf{s}}_0}^T \\
 &= \begin{pmatrix} 0 & r_0^{-1}\sigma_r^{-2} - r_0^{-3}\sigma_\theta^{-2} \\ r_0^{-1}\sigma_r^{-2} - r_0^{-3}\sigma_\theta^{-2} & 0 \end{pmatrix} = \begin{pmatrix} \Lambda_{xx}^x & \Lambda_{xy}^x \\ \Lambda_{xy}^x & \Lambda_{yy}^x \end{pmatrix}, \\
 \left[ \frac{\partial \mathbf{V}(\mathbf{s})^{-1}}{\partial y} \right]_{\mathbf{s}=\bar{\mathbf{s}}_0} &= \left[ \frac{\partial \mathbf{L}(r)}{\partial y} \right]_{\mathbf{s}=\bar{\mathbf{s}}_0} = \begin{pmatrix} -2r_0^{-3}\sigma_\theta^{-2} & 0 \\ 0 & 0 \end{pmatrix} = \begin{pmatrix} \Lambda_{xx}^y & \Lambda_{xy}^y \\ \Lambda_{xy}^y & \Lambda_{yy}^y \end{pmatrix}. \tag{F.16}
 \end{aligned}$$

3 Finally, substituting Eqs. (F.11) and (F.16) into Eqs. (16) in the main text, we get

$$4 \quad Q_{xx}^x = \frac{\sigma_x^2}{2} \Lambda_{xx}^x = 0, \quad Q_{xy}^x = \frac{\sigma_x^2}{2} \Lambda_{xy}^x = -r_0^{-1}, \quad Q_{yy}^x = \frac{\sigma_x^2}{2} [2\Lambda_{xy}^y - \Lambda_{yy}^x] = 0, \tag{F.17a}$$

5 and

$$\begin{aligned}
 Q_{xx}^y &= \frac{\sigma_r^2}{2} [2\Lambda_{xy}^x - \Lambda_{xx}^y] = \sigma_r^2 [r_0^{-1}\sigma_r^{-2} - r_0^{-3}\sigma_\theta^{-2}] + \sigma_r^2 r_0^{-3}\sigma_\theta^{-2} = r_0^{-1}, \\
 Q_{xy}^y &= \frac{\sigma_r^2}{2} \Lambda_{xy}^y = 0, \quad Q_{yy}^y = \frac{\sigma_r^2}{2} \Lambda_{yy}^y = 0. \tag{F.17b}
 \end{aligned}$$

### 7 F.3. Geodesic invasion fitness function

8 In the original coordinates before rotation,  $\bar{\mathbf{s}} = (\bar{x}, \bar{y})^T$ , we express the invasion fitness  
 9 function (Eq. (25) in the main text) as

$$10 \quad \bar{f}(\bar{\mathbf{s}}', \bar{\mathbf{s}}) = 1 - \frac{\alpha(\bar{\mathbf{s}}' - \bar{\mathbf{s}})K(\bar{\mathbf{s}})}{K(\bar{\mathbf{s}}')}, \tag{F.18}$$

11 and expand it around the focal point  $\bar{\mathbf{s}}_0$  as

$$12 \quad \bar{f}(\bar{\mathbf{s}}', \bar{\mathbf{s}}) = \bar{\mathbf{g}}^T \delta \bar{\mathbf{s}} + [\bar{\mathbf{s}} - \bar{\mathbf{s}}_0]^T \bar{\mathbf{C}} \delta \bar{\mathbf{s}} + \frac{1}{2} \delta \bar{\mathbf{s}}^T \bar{\mathbf{D}} \delta \bar{\mathbf{s}} + \text{h. o. t.}, \tag{F.19a}$$

13 with  $\delta \bar{\mathbf{s}} = \bar{\mathbf{s}}' - \bar{\mathbf{s}}$  and

$$14 \quad \bar{\mathbf{g}} = \begin{pmatrix} \bar{g}_x \\ \bar{g}_y \end{pmatrix} = \nabla_{\bar{\mathbf{s}}'} \bar{f}(\bar{\mathbf{s}}_0, \bar{\mathbf{s}}_0) = \left( \frac{\partial \bar{f}(\bar{\mathbf{s}}', \bar{\mathbf{s}})}{\partial \bar{x}'} \right)_{\bar{\mathbf{s}}'=\bar{\mathbf{s}}_0} = -\frac{1}{\sigma_K^2} \begin{pmatrix} \bar{x}_0 - x_K \\ \bar{y}_0 - y_K \end{pmatrix} \tag{F.19b}$$

$$\begin{aligned} \bar{\mathbf{D}} &= \begin{pmatrix} \bar{D}_{xx} & \bar{D}_{xy} \\ \bar{D}_{xy} & \bar{D}_{yy} \end{pmatrix} = \nabla_{\bar{\mathbf{s}}'} \nabla_{\bar{\mathbf{s}}'}^T \bar{f}(\bar{\mathbf{s}}_0, \bar{\mathbf{s}}_0) = \begin{pmatrix} \frac{\partial^2 \bar{f}(\bar{\mathbf{s}}', \bar{\mathbf{s}})}{\partial \bar{x}'^2} & \frac{\partial^2 \bar{f}(\bar{\mathbf{s}}', \bar{\mathbf{s}})}{\partial \bar{x}' \partial \bar{y}'} \\ \frac{\partial^2 \bar{f}(\bar{\mathbf{s}}', \bar{\mathbf{s}})}{\partial \bar{x}' \partial \bar{y}'} & \frac{\partial^2 \bar{f}(\bar{\mathbf{s}}', \bar{\mathbf{s}})}{\partial \bar{y}'^2} \end{pmatrix}_{\mathbf{s}'=\bar{\mathbf{s}}=\bar{\mathbf{s}}_0} \\ &= \left[ \frac{1}{\sigma_\alpha^2} - \frac{1}{\sigma_K^2} \right] \begin{pmatrix} 1 & 0 \\ 0 & 1 \end{pmatrix} - \bar{\mathbf{g}} \bar{\mathbf{g}}^T, \end{aligned} \quad (\text{F.19c})$$

$$\bar{\mathbf{C}} = \begin{pmatrix} \bar{C}_{xx} & \bar{C}_{xy} \\ \bar{C}_{yx} & \bar{C}_{yy} \end{pmatrix} = \bar{\mathbf{D}} + \nabla_{\bar{\mathbf{s}}} \nabla_{\bar{\mathbf{s}}'}^T \bar{f}(\bar{\mathbf{s}}_0, \bar{\mathbf{s}}_0)$$

$$= \bar{\mathbf{D}} + \begin{pmatrix} \frac{\partial^2 \bar{f}(\bar{\mathbf{s}}', \bar{\mathbf{s}})}{\partial \bar{x} \partial \bar{x}'} & \frac{\partial^2 \bar{f}(\bar{\mathbf{s}}', \bar{\mathbf{s}})}{\partial \bar{x} \partial \bar{y}'} \\ \frac{\partial^2 \bar{f}(\bar{\mathbf{s}}', \bar{\mathbf{s}})}{\partial \bar{y} \partial \bar{x}'} & \frac{\partial^2 \bar{f}(\bar{\mathbf{s}}', \bar{\mathbf{s}})}{\partial \bar{y} \partial \bar{y}'} \end{pmatrix}_{\mathbf{s}'=\bar{\mathbf{s}}=\bar{\mathbf{s}}_0} = -\frac{1}{\sigma_K^2} \begin{pmatrix} 1 & 0 \\ 0 & 1 \end{pmatrix}. \quad (\text{F.19d})$$

Substituting Eq. (F.8) into Eqs. (F.19) gives the invasion fitness in the rotated original coordinates  $\mathbf{s}$ ,

$$f(\mathbf{s}', \mathbf{s}) = \mathbf{g}^T \delta \mathbf{s} + [\mathbf{s} - \bar{\mathbf{s}}_0]^T \mathbf{C} \delta \mathbf{s} + \frac{1}{2} \delta \mathbf{s}^T \mathbf{D} \delta \mathbf{s} + \text{h. o. t.}, \quad (\text{F.20a})$$

with

$$\begin{aligned} \mathbf{g} &= \begin{pmatrix} g_x \\ g_y \end{pmatrix} = \mathbf{P}(\theta_0)^T \bar{\mathbf{g}} = \frac{1}{r_0} \begin{pmatrix} \bar{y}_0 & -\bar{x}_0 \\ \bar{x}_0 & \bar{y}_0 \end{pmatrix} \left[ -\frac{1}{\sigma_K^2} \begin{pmatrix} \bar{x}_0 - x_K \\ \bar{y}_0 - y_K \end{pmatrix} \right] \\ &= -\frac{1}{\sigma_K^2 r_0} \begin{pmatrix} y_K \bar{x}_0 - x_K \bar{y}_0 \\ r_0^2 - x_K \bar{x}_0 - y_K \bar{y}_0 \end{pmatrix}, \end{aligned}$$

$$\mathbf{C} = \begin{pmatrix} C_{xx} & C_{xy} \\ C_{yx} & C_{yy} \end{pmatrix} = \mathbf{P}(\theta_0)^T \bar{\mathbf{C}} \mathbf{P}(\theta_0) = \bar{\mathbf{C}} = -\frac{1}{\sigma_K^2} \begin{pmatrix} 1 & 0 \\ 0 & 1 \end{pmatrix},$$

$$\begin{aligned} \mathbf{D} &= \begin{pmatrix} D_{xx} & D_{xy} \\ D_{xy} & D_{yy} \end{pmatrix} = \mathbf{P}(\theta_0)^T \bar{\mathbf{D}} \mathbf{P}(\theta_0) = \bar{\mathbf{D}} - \mathbf{P}(\theta_0)^T \bar{\mathbf{g}} \bar{\mathbf{g}}^T \mathbf{P}(\theta_0) \\ &= \left[ \frac{1}{\sigma_\alpha^2} - \frac{1}{\sigma_K^2} \right] \begin{pmatrix} 1 & 0 \\ 0 & 1 \end{pmatrix} - \mathbf{g} \mathbf{g}^T \end{aligned} \quad (\text{F.20b})$$

and

$$\boldsymbol{\Omega} = -g_x \mathbf{Q}^x - g_y \mathbf{Q}^y = r_0^{-1} \begin{pmatrix} -g_y & g_x \\ g_x & 0 \end{pmatrix}. \quad (\text{F.20c})$$

In addition, Eq. (F.11) gives

$$\sigma_x = r_0 \sigma_\theta,$$

1

$$\sigma_y = \sigma_r. \quad (\text{F.20d})$$

## 2 **F.4. Evolutionary branching points**

3 Since the branching point conditions are not affected by the distortion, as shown in  
 4 Section 3.3, we can directly examine those conditions in the original coordinates  $\bar{\mathbf{s}}$  (or  
 5 in the rotated original coordinates  $\mathbf{s}$ , equivalently), by using Eqs. (F.19). Condition (i)  
 6 (for evolutionary singularity),  $\bar{\mathbf{g}} = \mathbf{g} = \mathbf{0}$ , gives a unique evolutionarily singular point  
 7  $\bar{\mathbf{s}}_0 = \mathbf{s}_K = (x_K, y_K)^T$ . At the point, we see

$$8 \quad \bar{\mathbf{C}} = \mathbf{C} = -\frac{1}{\sigma_K^2} \begin{pmatrix} 1 & 0 \\ 0 & 1 \end{pmatrix}, \quad \bar{\mathbf{D}} = \mathbf{D} = \left( \frac{1}{\sigma_\alpha^2} - \frac{1}{\sigma_K^2} \right) \begin{pmatrix} 1 & 0 \\ 0 & 1 \end{pmatrix}. \quad (\text{F.21})$$

9 Thus, condition (ii) (for strong convergence stability) is always satisfied. Condition (iii)  
 10 (for evolutionary instability) is satisfied if and only if  $\sigma_\alpha < \sigma_K$ . Therefore, a necessary  
 11 and sufficient condition for existence of an evolutionary branching point is given by  
 12  $\sigma_\alpha < \sigma_K$ .

## 13 **F.5. Evolutionary branching lines**

14 We apply the simplified branching line conditions described in Section 3.4, by  
 15 substituting Eqs. (F.20) into Eqs. (21) in the main text. For simplicity, we assume that  
 16  $\sigma_y = \sigma_r$  is much smaller than  $\sigma_x = r_0 \sigma_\theta$ , so that condition (i) is satisfied. Then  
 17 condition (ii) (for evolutionarily singular line) is given by

$$18 \quad \tilde{g}_x = g_x = -\frac{1}{\sigma_K^2 r_0} [y_K \bar{x}_0 - x_K \bar{y}_0] = 0, \quad (\text{F.22})$$

19 which forms a line

$$20 \quad \begin{pmatrix} \bar{x}_0 \\ \bar{y}_0 \end{pmatrix} = \begin{pmatrix} x_K \frac{r_0}{r_K} \\ y_K \frac{r_0}{r_K} \end{pmatrix} \quad (\text{F.23})$$



1 with  $r_K = \sqrt{x_K^2 + y_K^2}$  and a positive parameter  $r_0$ . From Eqs. (F.20) and (F.23) we see

$$\begin{aligned}
 \tilde{g}_y &= g_y = -\frac{1}{\sigma_K^2} [r_0 - r_K], \\
 \tilde{C}_{xx} &= C_{xx} + \Omega_{xx} = -\frac{1}{\sigma_K^2} + \Omega_{xx}, \\
 \tilde{D}_{xx} &= D_{xx} + \Omega_{xx} = \left[ \frac{1}{\sigma_\alpha^2} - \frac{1}{\sigma_K^2} \right] + \Omega_{xx}, \\
 \Omega_{xx} &= -r_0^{-1} g_y = \frac{1}{\sigma_K^2} \left[ 1 - \frac{r_K}{r_0} \right].
 \end{aligned} \tag{F.24}$$

3 Thus, condition (ii) (for convergence stability along  $\tilde{x}$ ) is expressed as

$$\tilde{C}_{xx} = -\frac{1}{\sigma_K^2} + \Omega_{xx} = -\frac{r_K}{\sigma_K^2 r_0} < 0, \tag{E.25}$$

5 which is always satisfied because  $r_0 > 0$ . Condition (iv) (for sufficient disruptive  
6 selection along  $\tilde{x}$ ) is expressed as

$$\frac{\tilde{\sigma}_x^2 \tilde{D}_{xx}}{\tilde{\sigma}_y |\tilde{g}_y|} = \frac{\sigma_\theta^2 r_0^2 \left[ \left( \frac{1}{\sigma_\alpha^2} - \frac{1}{\sigma_K^2} \right) + \Omega_{xx} \right]}{\sigma_r \left| \frac{r_0 - r_K}{\sigma_K^2} \right|} = \frac{\sigma_\theta^2 r_0^2 \left[ \frac{\sigma_K^2}{\sigma_\alpha^2} - \frac{r_K}{r_0} \right]}{\sigma_r |r_0 - r_K|} > \sqrt{2}. \tag{F.26}$$

## 8 F.6. Meaning of geodesic invasion fitness

9 Here we show that the geodesic invasion fitness function for a focal point describes the  
10 invasion fitness function in the undistorted coordinates  $\mathbf{u} = (r, \theta)^T$  up to the second  
11 order terms.

12 Substituting Eqs. (24) and (26) into Eq. (25), we express the invasion fitness in  
13 coordinates  $\mathbf{u} = (r, \theta)^T$  as

$$\begin{aligned}
 f_{\mathbf{u}}(\mathbf{u}', \mathbf{u}) &= \exp \left( \frac{r'^2 + r^2 - 2r'r \cos(\theta' - \theta)}{2\sigma_\alpha^2} \right) \\
 &\times \exp \left( -\frac{r'^2 - r^2 - 2r'r_K \cos(\theta' - \theta_K) + 2rr_K \cos(\theta - \theta_K)}{2\sigma_K^2} \right),
 \end{aligned} \tag{F.27}$$

15 which is expanded around the point  $\mathbf{u}_0 = (\theta_0, r_0)^T$  corresponding to the focal point

1  $\bar{\mathbf{s}}_0 = (r_0 \sin \theta_0, r_0 \cos \theta_0)^T$  as

2 
$$f_{\mathbf{u}}(\mathbf{u}', \mathbf{u}) = \mathbf{g}_{\mathbf{u}}^T \delta \mathbf{u} + [\mathbf{u} - \mathbf{u}_0]^T \mathbf{C}_{\mathbf{u}} \delta \mathbf{u} + \frac{1}{2} \delta \mathbf{u}^T \mathbf{D}_{\mathbf{u}} \delta \mathbf{u} + \text{h. o. t.}, \quad (\text{F. 28a})$$

3 with

4 
$$\mathbf{g}_{\mathbf{u}} = -\frac{1}{\sigma_K^2} \begin{pmatrix} r_0 r_K \sin(\theta_0 - \theta_K) \\ r_0 - r_K \cos(\theta_0 - \theta_K) \end{pmatrix},$$

5 
$$\mathbf{C}_{\mathbf{u}} = -\frac{1}{\sigma_K^2} \begin{pmatrix} r_0 r_K \cos(\theta_0 - \theta_K) & r_K \sin(\theta_0 - \theta_K) \\ r_K \sin(\theta_0 - \theta_K) & 1 \end{pmatrix}, \quad (\text{F. 29b})$$

5 and

6 
$$\mathbf{D}_{\mathbf{u}} = \begin{pmatrix} D_{\theta\theta} & D_{\theta r} \\ D_{\theta r} & D_{rr} \end{pmatrix},$$

7 
$$D_{\theta\theta} = \frac{r^2}{\sigma_{\alpha}^2} - \left[ \frac{r_0 r_K \sin(\theta_0 - \theta_K)}{\sigma_K^2} \right]^2 - \frac{r_0 r_K \cos(\theta_0 - \theta_K)}{\sigma_K^2},$$

8 
$$D_{rr} = \frac{1}{\sigma_{\alpha}^2} - \frac{1}{\sigma_K^2} - \left[ \frac{r_0 - r_K \cos(\theta_0 - \theta_K)}{\sigma_K^2} \right]^2,$$

9 
$$D_{\theta r} = -r_0 \left[ \frac{r_K \sin(\theta_0 - \theta_K)}{\sigma_K^2} \right] \left[ \frac{r_0 - r_K \cos(\theta_0 - \theta_K)}{\sigma_K^2} \right] - \frac{r_K \sin(\theta_0 - \theta_K)}{\sigma_K^2}. \quad (\text{F. 29c})$$

7 On the other hand, we can express the geodesic invasion fitness (from Eqs. (18) with  
8 Eqs. (F.20)) as

9 
$$\tilde{f}(\tilde{\mathbf{s}}', \tilde{\mathbf{s}}) = \tilde{\mathbf{g}}^T \delta \tilde{\mathbf{s}} + [\tilde{\mathbf{s}} - \bar{\mathbf{s}}_0]^T \tilde{\mathbf{C}} \delta \tilde{\mathbf{s}} + \frac{1}{2} \delta \tilde{\mathbf{s}}^T \tilde{\mathbf{D}} \delta \tilde{\mathbf{s}} + \text{h. o. t.} \quad (\text{F. 30a})$$

10 with

11 
$$\tilde{\mathbf{g}} = \mathbf{H}^T \mathbf{g}_{\mathbf{u}}, \quad \tilde{\mathbf{C}} = \mathbf{H}^T \mathbf{C}_{\mathbf{u}} \mathbf{H}, \quad \tilde{\mathbf{D}} = \mathbf{H}^T \mathbf{D}_{\mathbf{u}} \mathbf{H},$$

12 
$$\mathbf{H} = \begin{pmatrix} r_0^{-1} & 0 \\ 0 & 1 \end{pmatrix}. \quad (\text{F. 30b}),$$

12 Note that the coordinates  $\mathbf{u} = (r, \theta)^T$  has a globally constant mutational covariance  
13  $\begin{pmatrix} \sigma_{\theta}^2 & 0 \\ 0 & \sigma_r^2 \end{pmatrix}$ , while the geodesic coordinates  $\tilde{\mathbf{s}} = (\tilde{x}, \tilde{y})^T$  have a locally constant

1 mutational covariance  $\begin{pmatrix} r_0^2 \sigma_\theta^2 & 0 \\ 0 & \sigma_r^2 \end{pmatrix}$  around the focal point  $\bar{\mathbf{s}}_0$ . Thus, we scale  $\tilde{x}$  of the  
 2 geodesic coordinates by  $r_0^{-1}$  (and shift  $\bar{\mathbf{s}}_0$  to  $\mathbf{u}_0$ ), by introducing new coordinates

$$3 \quad \mathbf{w} = \begin{pmatrix} X \\ Y \end{pmatrix} = \mathbf{H}[\tilde{\mathbf{s}} - \bar{\mathbf{s}}_0] + \mathbf{u}_0, \quad (\text{F.31})$$

4 to attain the same covariance matrix  $\begin{pmatrix} \sigma_\theta^2 & 0 \\ 0 & \sigma_r^2 \end{pmatrix}$  with that of the coordinates  $\mathbf{u} =$   
 5  $(r, \theta)^T$ . Then we get the scaled geodesic invasion fitness,

$$6 \quad \begin{aligned} f_{\mathbf{w}}(\mathbf{w}', \mathbf{w}) &= \tilde{f}(\mathbf{H}^{-1}[\mathbf{w}' - \mathbf{u}_0] + \bar{\mathbf{s}}_0, \mathbf{H}^{-1}[\mathbf{w} - \mathbf{u}_0] + \bar{\mathbf{s}}_0) \\ &= \mathbf{g}_{\mathbf{u}} \mathbf{d}\mathbf{w} + [\mathbf{w} - \mathbf{u}_0]^T \mathbf{C}_{\mathbf{u}} \delta \mathbf{w} + \frac{1}{2} \delta \mathbf{w}^T \mathbf{D}_{\mathbf{u}} \delta \mathbf{w} + \text{h. o. t.} \end{aligned} \quad (\text{F.32})$$

7 Note that Eq. (F.32) is identical to Eq. (28a). Therefore, the scaled geodesic fitness  
 8 function  $f_{\mathbf{w}}(\mathbf{w}', \mathbf{w})$  describes the invasion fitness function  $f_{\mathbf{u}}(\mathbf{u}', \mathbf{u})$  in the non-  
 9 distorted coordinates  $\mathbf{u} = (r, \theta)^T$  up to the second order terms. Since all of the  
 10 conditions for evolutionary branching points, lines, and areas in this paper concern only  
 11 the first and second order derivatives of invasion fitness functions, application of those  
 12 conditions in the coordinates  $\mathbf{u} = (r, \theta)^T$  give identical results to those in the scaled  
 13 geodesic coordinates  $\mathbf{w} = (X, Y)^T$ , which are also identical to those in the geodesic  
 14 coordinates  $\tilde{\mathbf{s}} = (\tilde{x}, \tilde{y})^T$ , because a linear coordinate transformation does not affect  
 15 those conditions.

16

## 17 Appendix G: Simulation algorithm for evolutionary dynamics

18 This study conducts numerical simulation of evolutionary dynamics in Example as trait  
 19 substitution sequences based on the oligomorphic stochastic model defined by Ito and  
 20 Dieckmann (2014). The oligomorphic stochastic model in Ito and Dieckmann (2014) is

- 1 the same with the algorithm described in Ito and Dieckmann (2007), except that  
2 population dynamics after each mutant invasion is directly calculated in Ito and  
3 Dieckmann (2014). The algorithm of the oligomorphic stochastic model used in this study  
4 is listed below.
- 5 0. [Initial setting] Set initial  $M$  phenotypes  $\mathbf{s}_1, \dots, \mathbf{s}_M$  at time  $t = 0$  (This study uses  
6  $M = 1$ , corresponding to an initially monomorphic community). Calculate  
7 equilibrium population densities  $\hat{\mathbf{n}} = (\hat{n}_1, \dots, \hat{n}_M)$  at which  $dn_k/dt = 0$  for all  
8  $k = 1, \dots, M$ . Define the extinction threshold  $\varepsilon$ .
  - 9 1. [Mutant emergence] Choose resident  $i$  with probability  $w_i/w$ , where  $w_k = \mu\hat{n}_k$   
10 is the emergence rate of a mutant from resident  $\mathbf{s}_k$ , with  $\mu$  the mutation rate per  
11 unit population density per one generation, and  $w = \sum_{k=1}^M w_k$ . Choose a mutant  $\mathbf{s}'_i$   
12 according to the mutation distribution  $m(\mathbf{s}'_i, \mathbf{s}_i)$ .
  - 13 2. [Time updating] Update time  $t$  by adding  $\Delta t = -\frac{1}{w} \ln \zeta$ , where  $0 < \zeta \leq 1$  is a  
14 uniformly distributed random number.
  - 15 3. [Mutant invasion] Choose a uniformly distributed random number  $0 < \zeta \leq 1$ . If  $\zeta$   
16 is smaller than the invasion fitness  $f(\mathbf{s}'_i; \mathbf{s}_1, \dots, \mathbf{s}_M)$  of the mutant phenotype  $\mathbf{s}'_i$   
17 against residents  $\mathbf{s}_1, \dots, \mathbf{s}_M$  at  $\hat{\mathbf{n}} = (\hat{n}_1, \dots, \hat{n}_M)$ , proceed to Step 4. Otherwise,  
18 return to Step 1.
  - 19 4. [Population dynamics triggered by mutant invasion] Increase  $M$  by 1 and set  $\mathbf{s}_M =$   
20  $\mathbf{s}'_i$ . Calculate equilibrium population densities from population dynamics with initial  
21 population densities  $(n_1, \dots, n_{M-1}, n_M) = (\hat{n}_1, \dots, \hat{n}_{M-1}, c\varepsilon)$  with a constant  $c \geq 1$ .  
22 In the course of these population dynamics, delete phenotypes  $\mathbf{s}_k$  with  $n_k < \varepsilon$ ,  
23 and decrease  $M$  accordingly.

1 5. Continue with Step 1.

2

3 Note that the time taking for population dynamics triggered by a mutant invasion  
4 to reach the next equilibrium (Step 4) is assumed to be negligible in comparison with  
5 waiting times for invading mutants (Step 2). The above algorithm is slightly simplified  
6 from Ito and Dieckmann (2014), by assuming that the birth rate per unit population  
7 density per unite time is equal to 1.

8 For the numerical simulation in Example, the two parameters  $\varepsilon$  and  $c$  are set at  
9  $\varepsilon = 1 \times 10^{-1}$  and  $c = 10^3$ . Occurrence of evolutionary branching are treated as  
10 emergence of polymorphic residents with the maximum distance among them  
11 exceeding  $15 \times \sigma_\theta$  along  $\theta$ .

12

## Figure 1 (Ito and Sasaki)

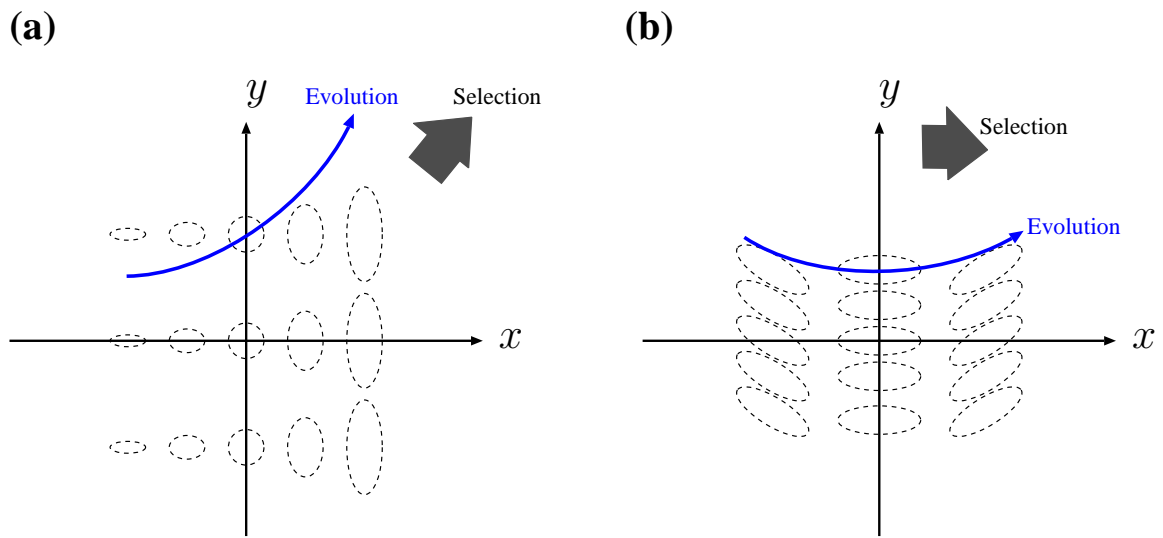

**Figure 2** (Ito and Sasaki)

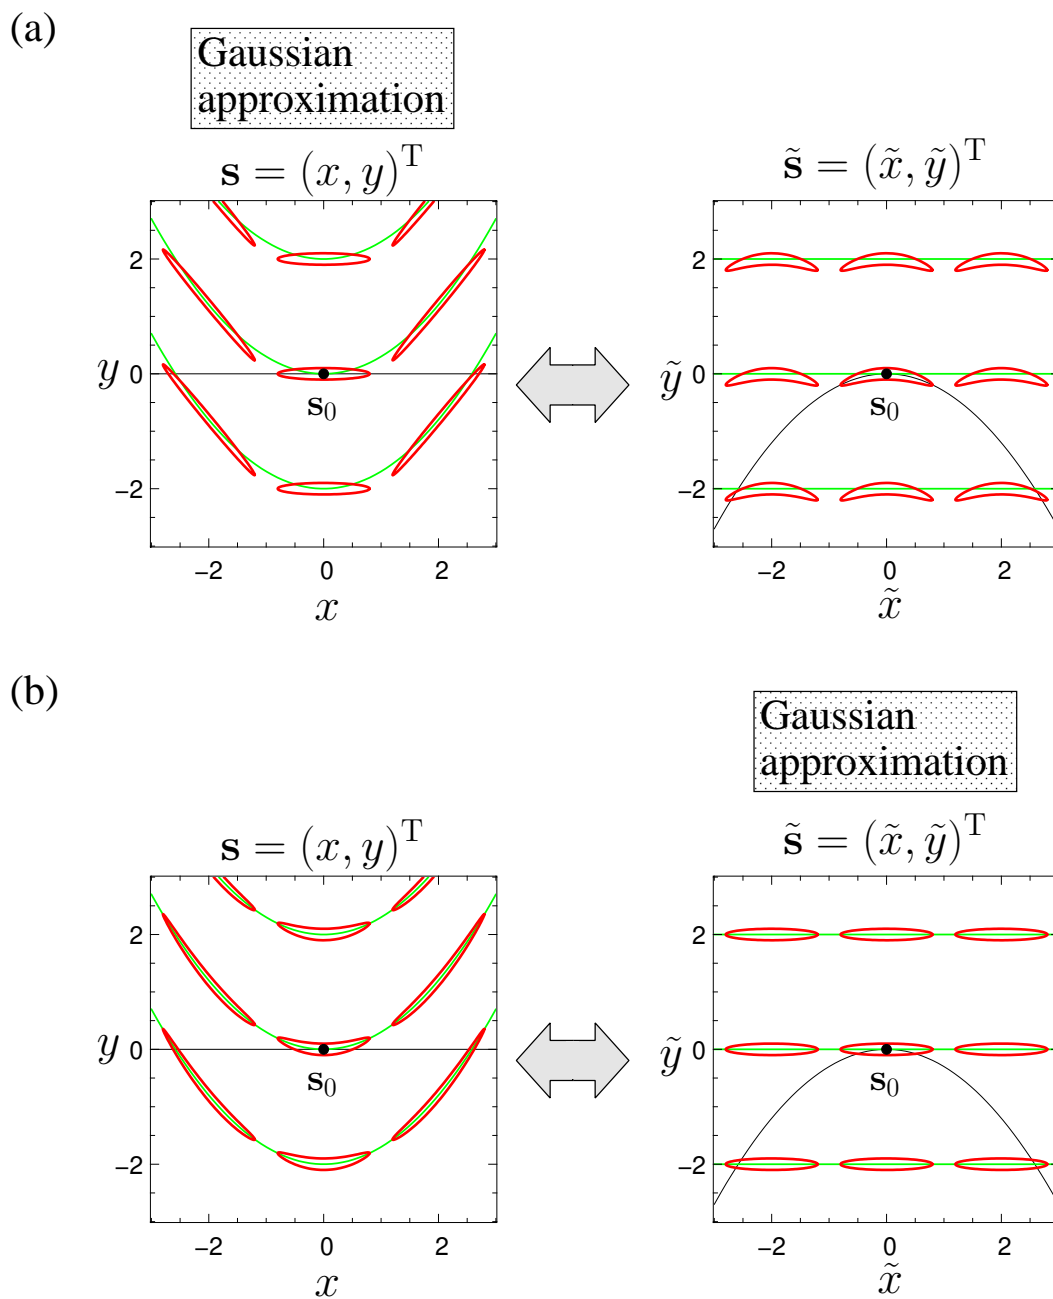

**Figure 3** (Ito and Sasaki)

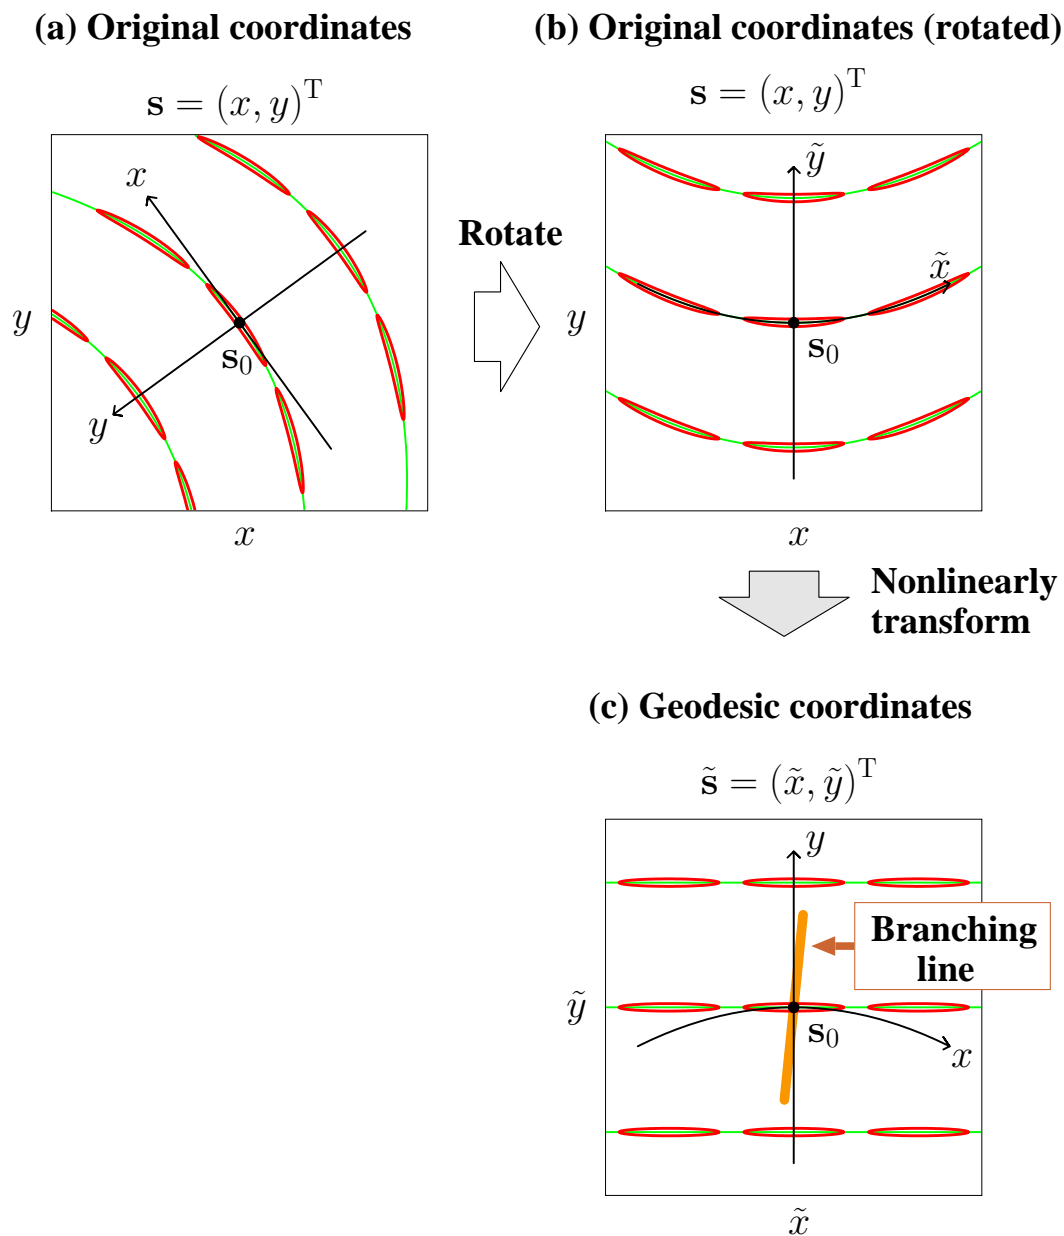



**Figure 4** (Ito and Sasaki)

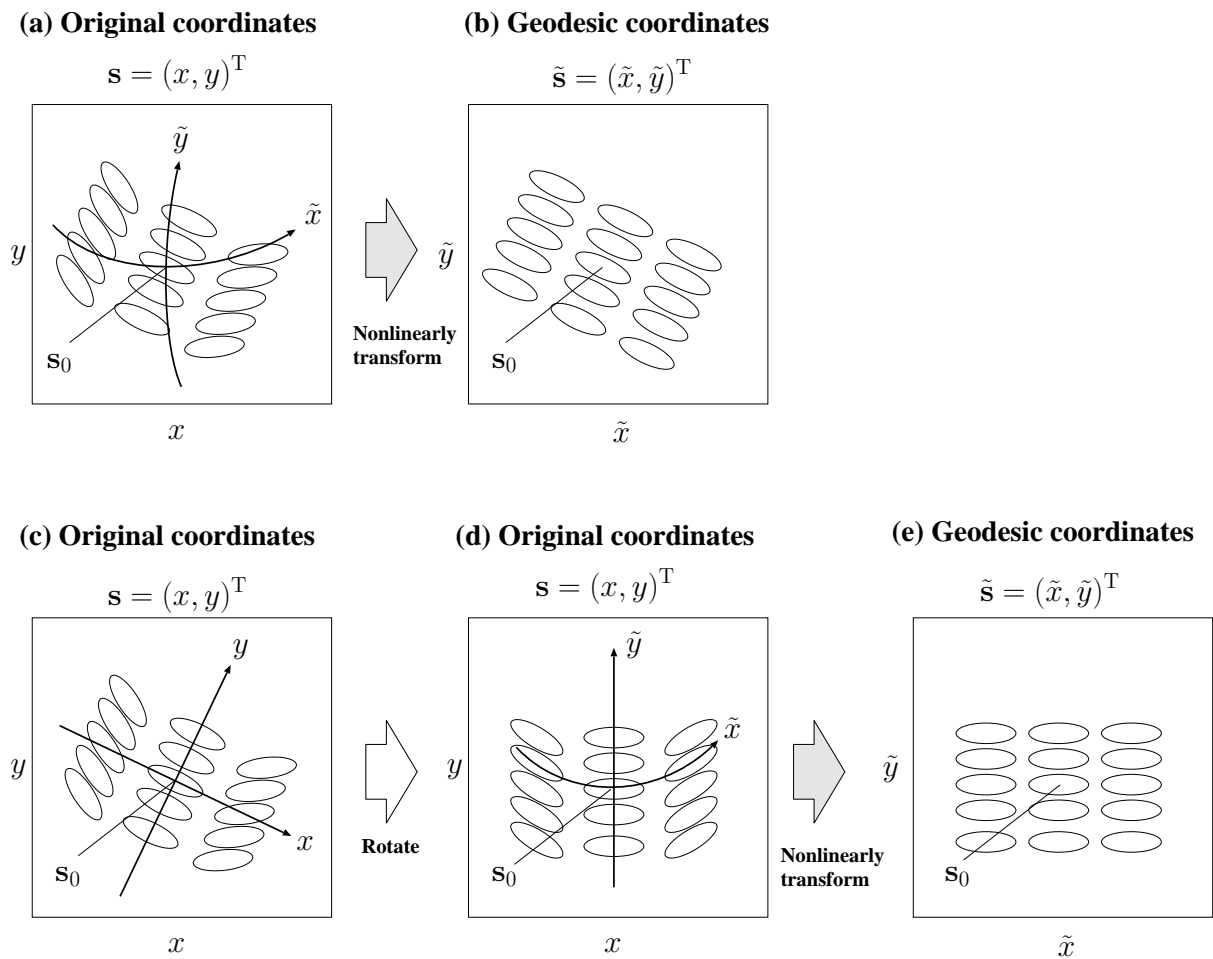

## Figure 5 (Ito and Sasaki)

(a) Original coordinates  $\mathbf{s} = (x, y)^T$

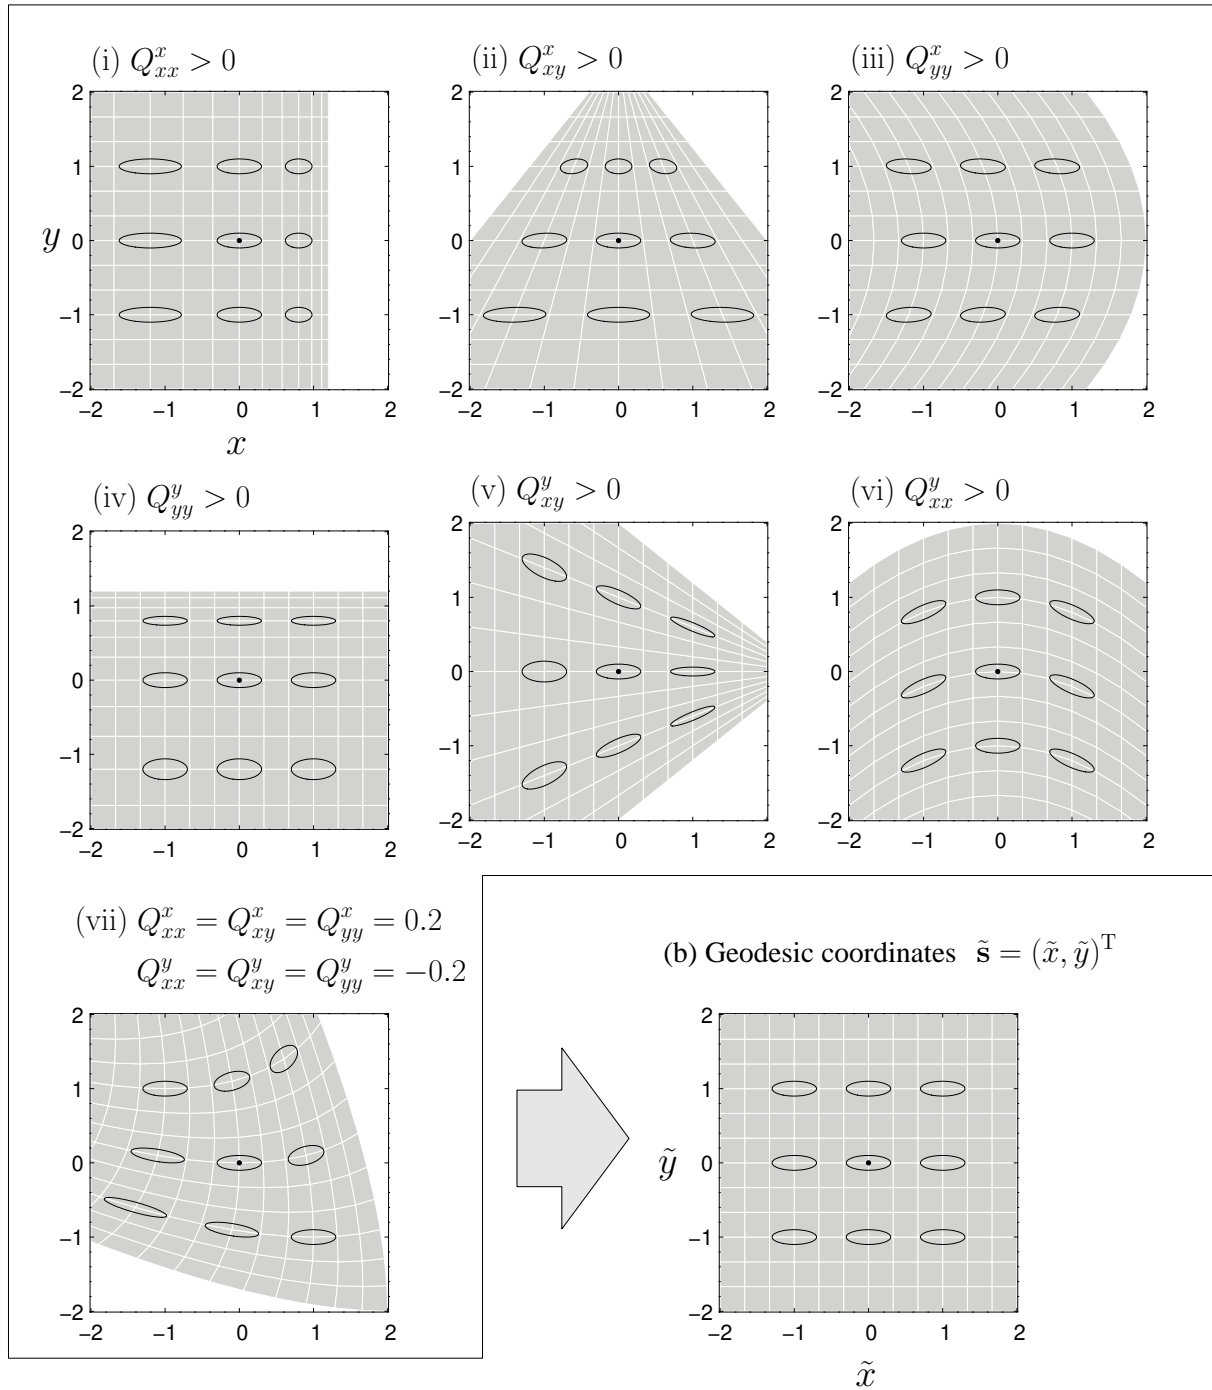

**Figure 6** (Ito and Sasaki)

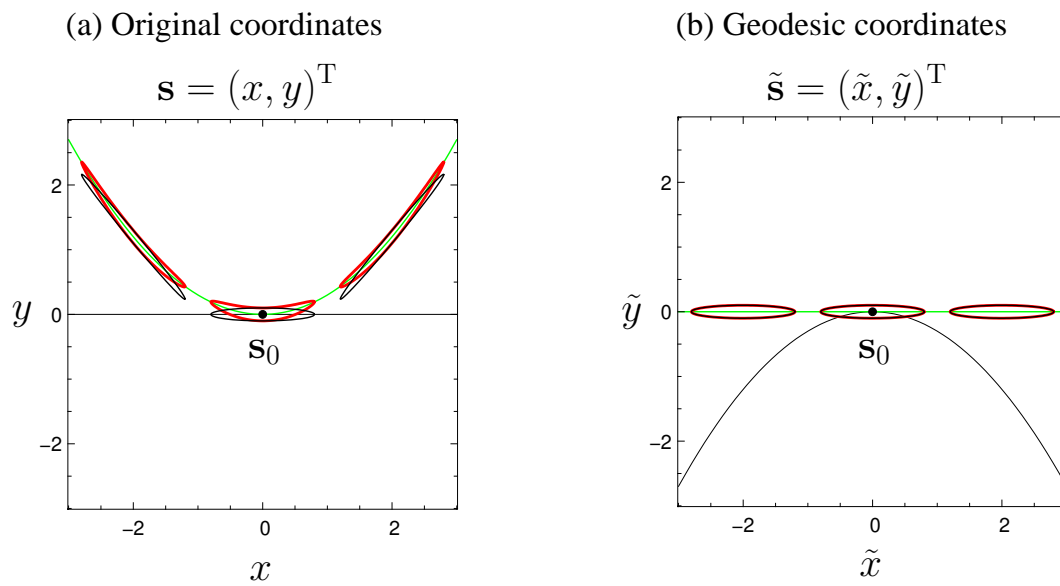

## Figure 7 (Ito and Sasaki)

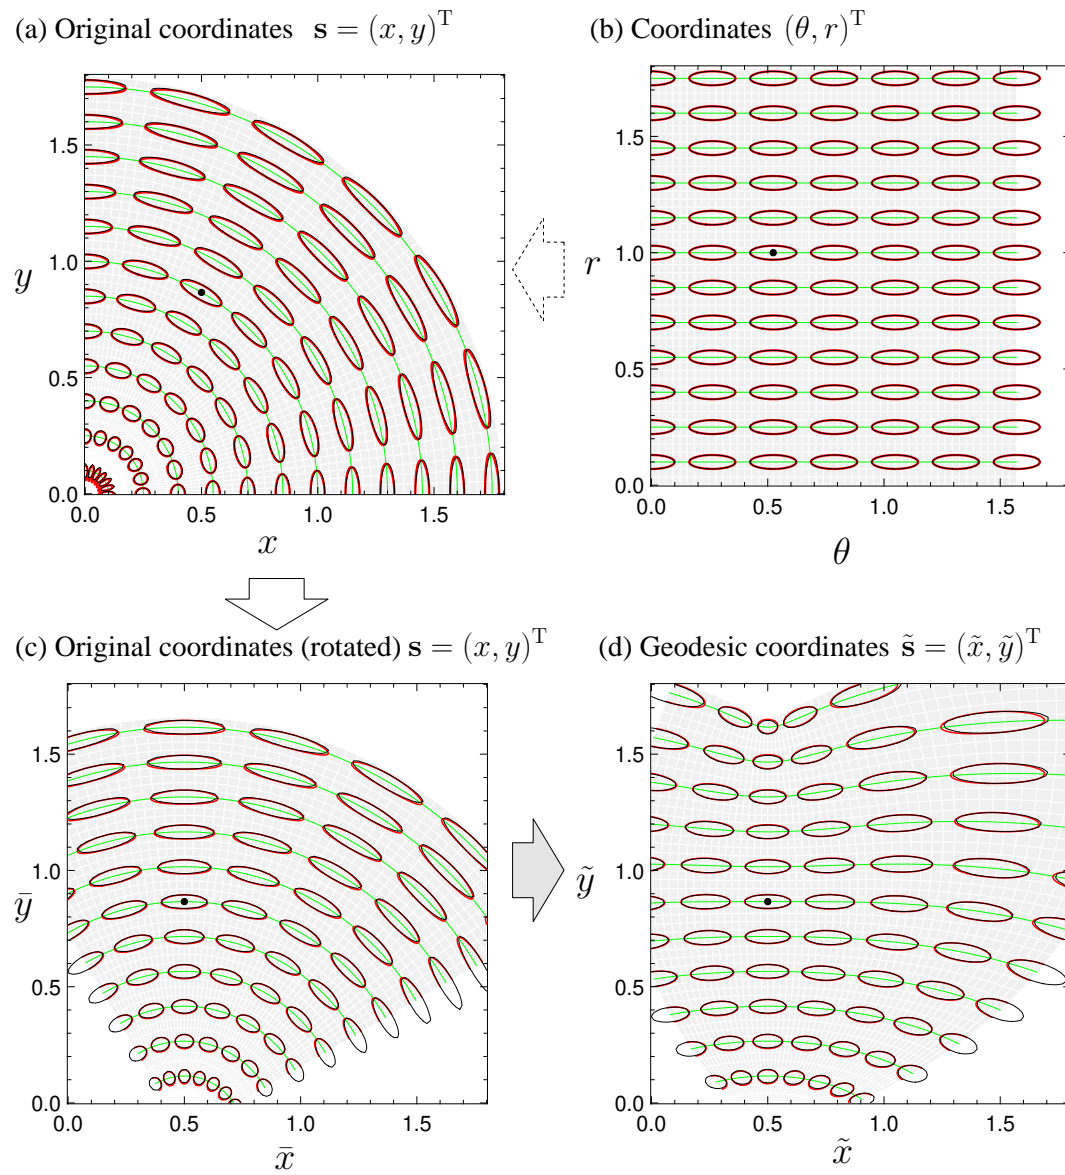

**Figure 8** (Ito and Sasaki)

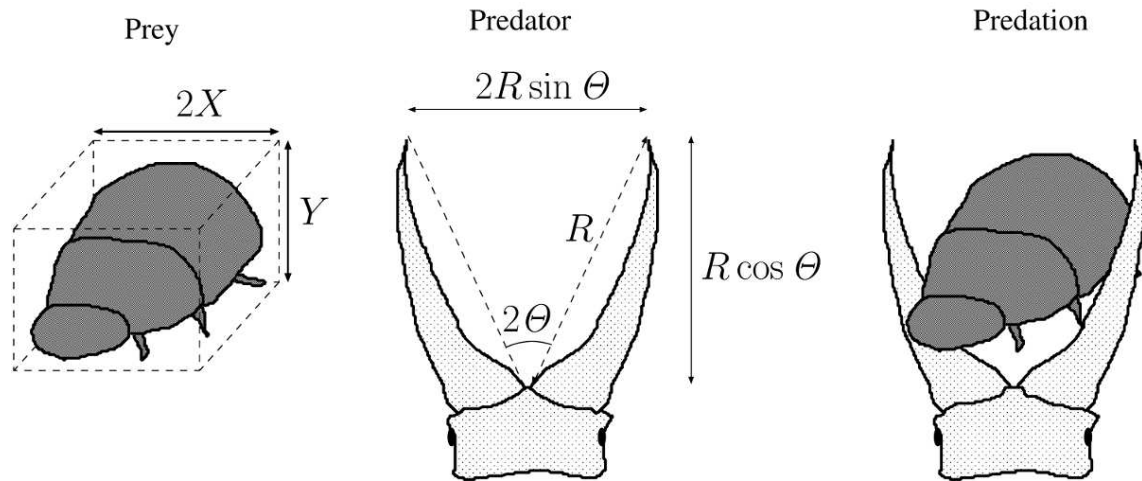

**Figure 9** (Ito and Sasaki)

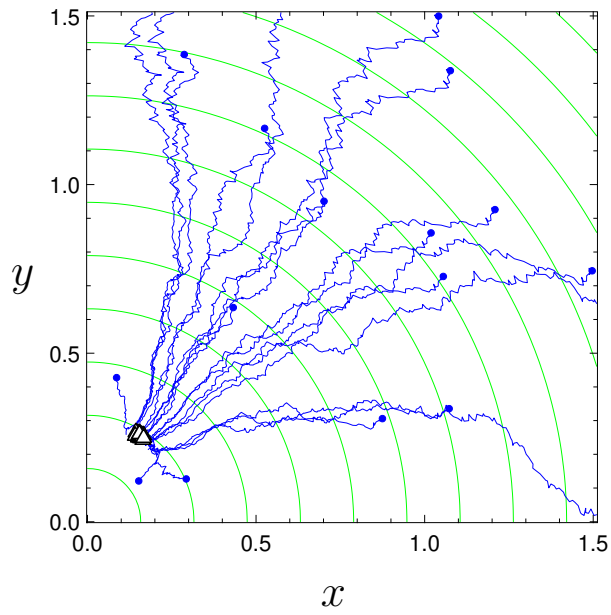

**Figure 10** (Ito and Sasaki)

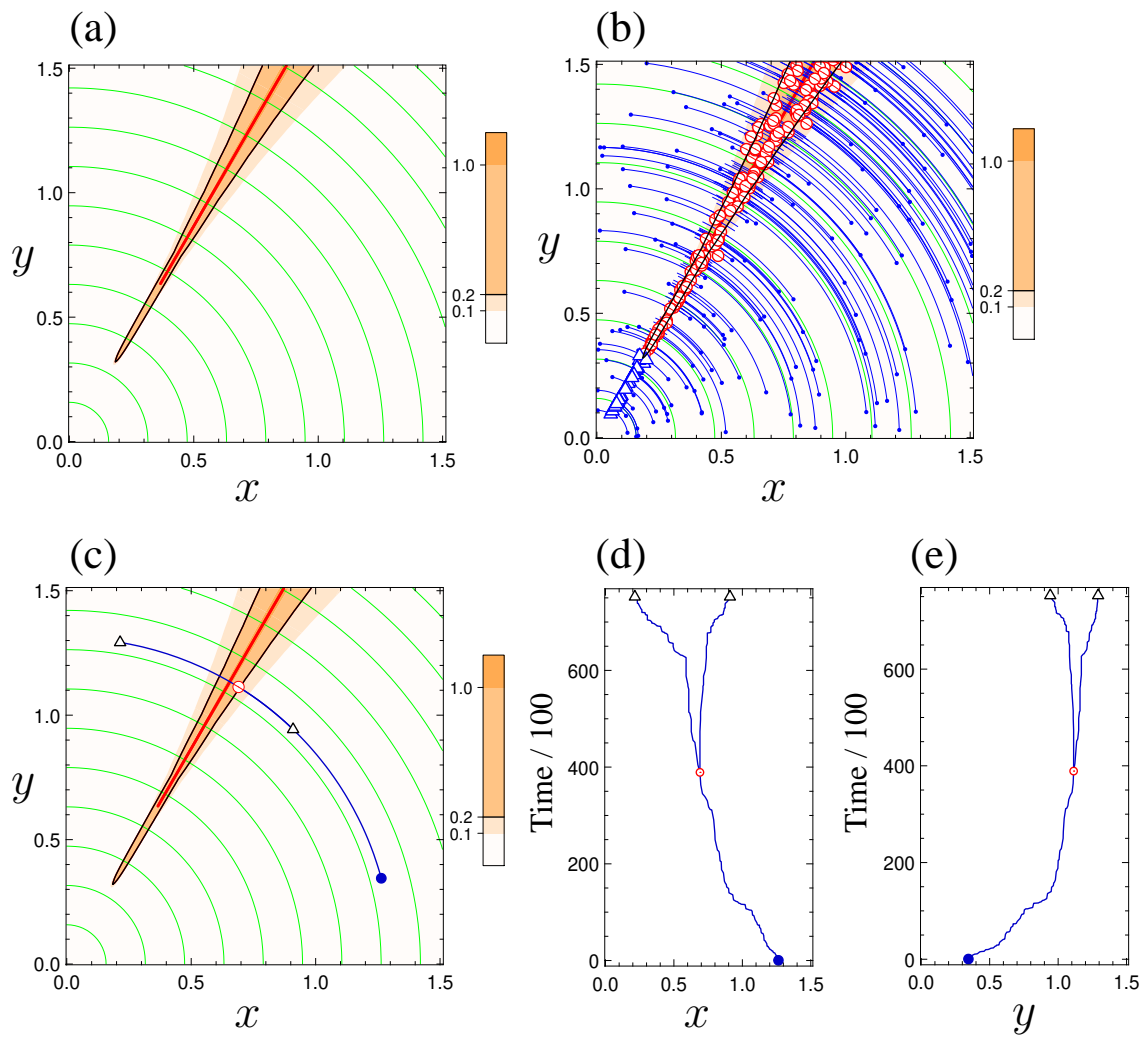

Source: https://www.biorxiv.org/content/10.1101/794966v2.full.pdf
